# Supplementary material
Source: PubMed Central journal article supplement (PMC8139365)

# Age group and sex specific standardised incidence (SIR) and mortality ratios (SMR) on district level by notification week

Figures 1 to 16 shows the age and sex specific SIR and SMR mapped on district level. Figures 17 to 18 shows the SIR and SMR and corresponding 95%-CI on national level, stratified by age and sex, respectively.

**Figure 1: Sex specific standardised incidence ratio (female)**

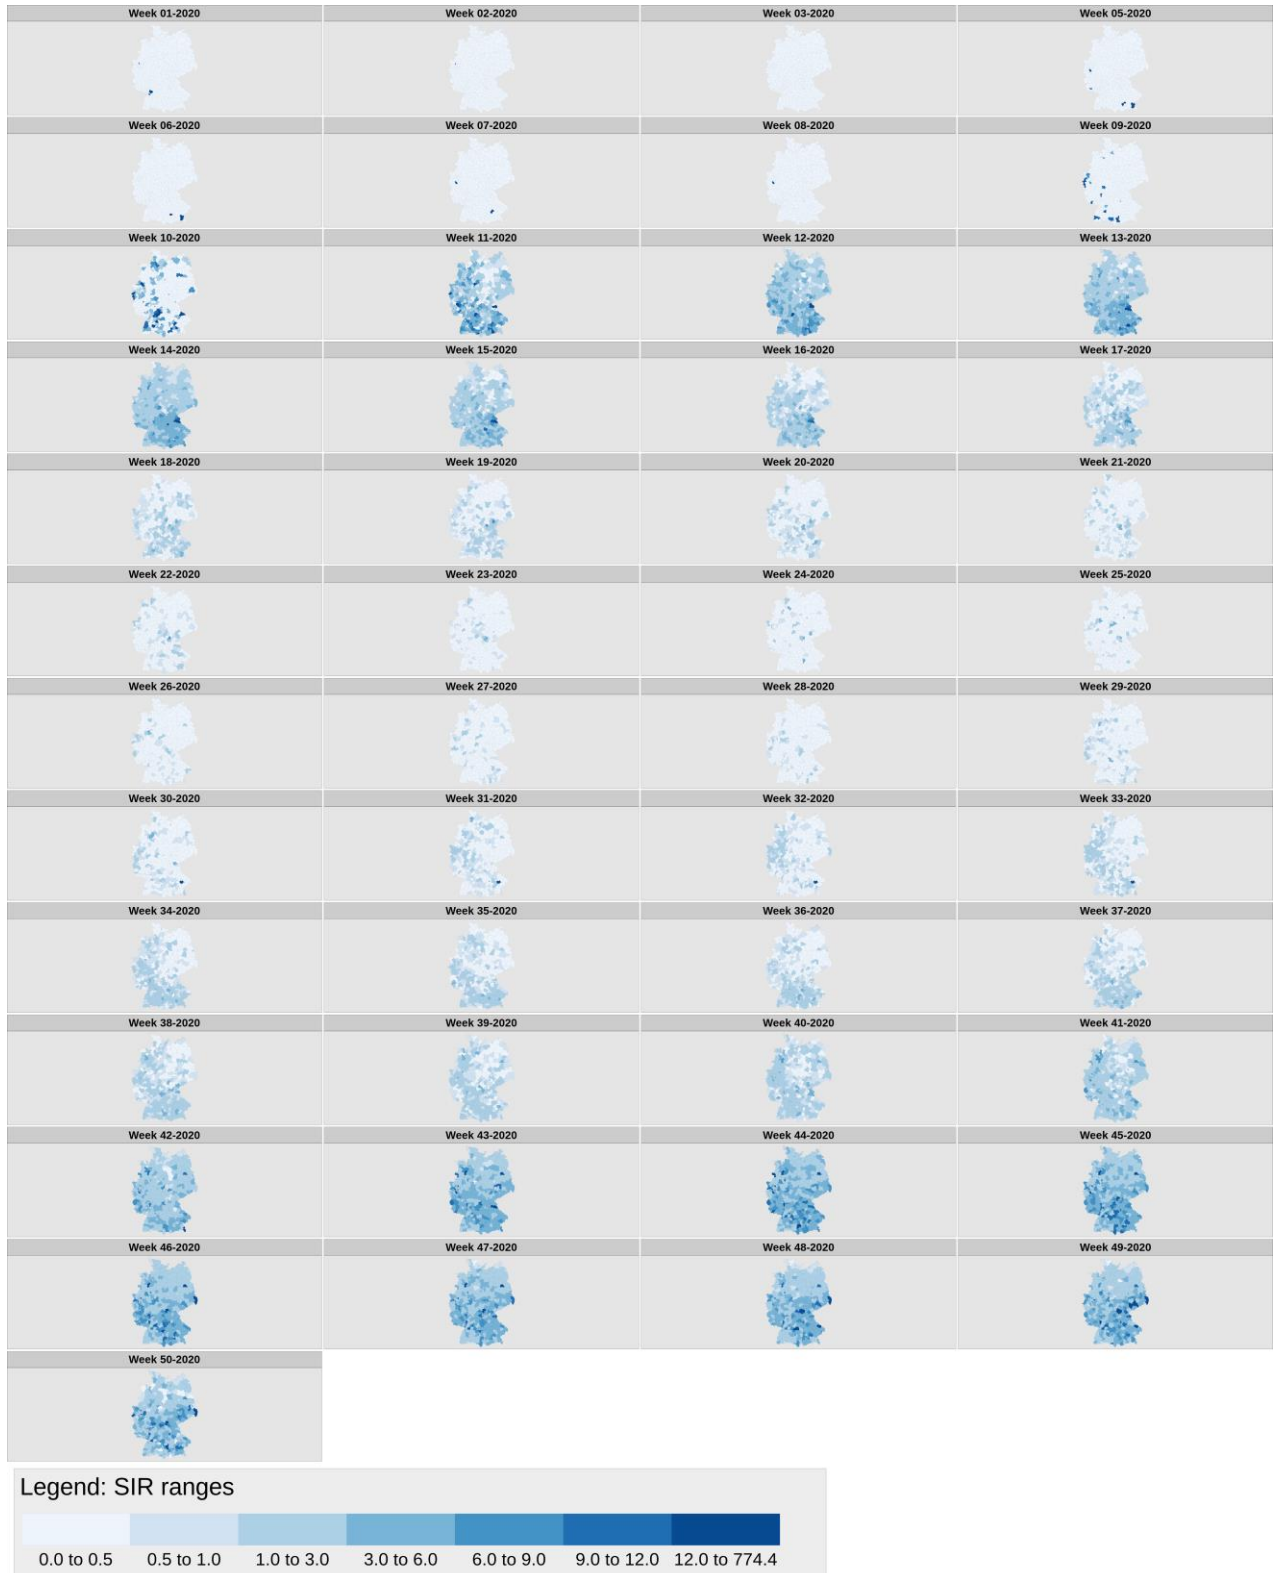

**Figure 2: Sex specific standardised incidence ratio (male)**

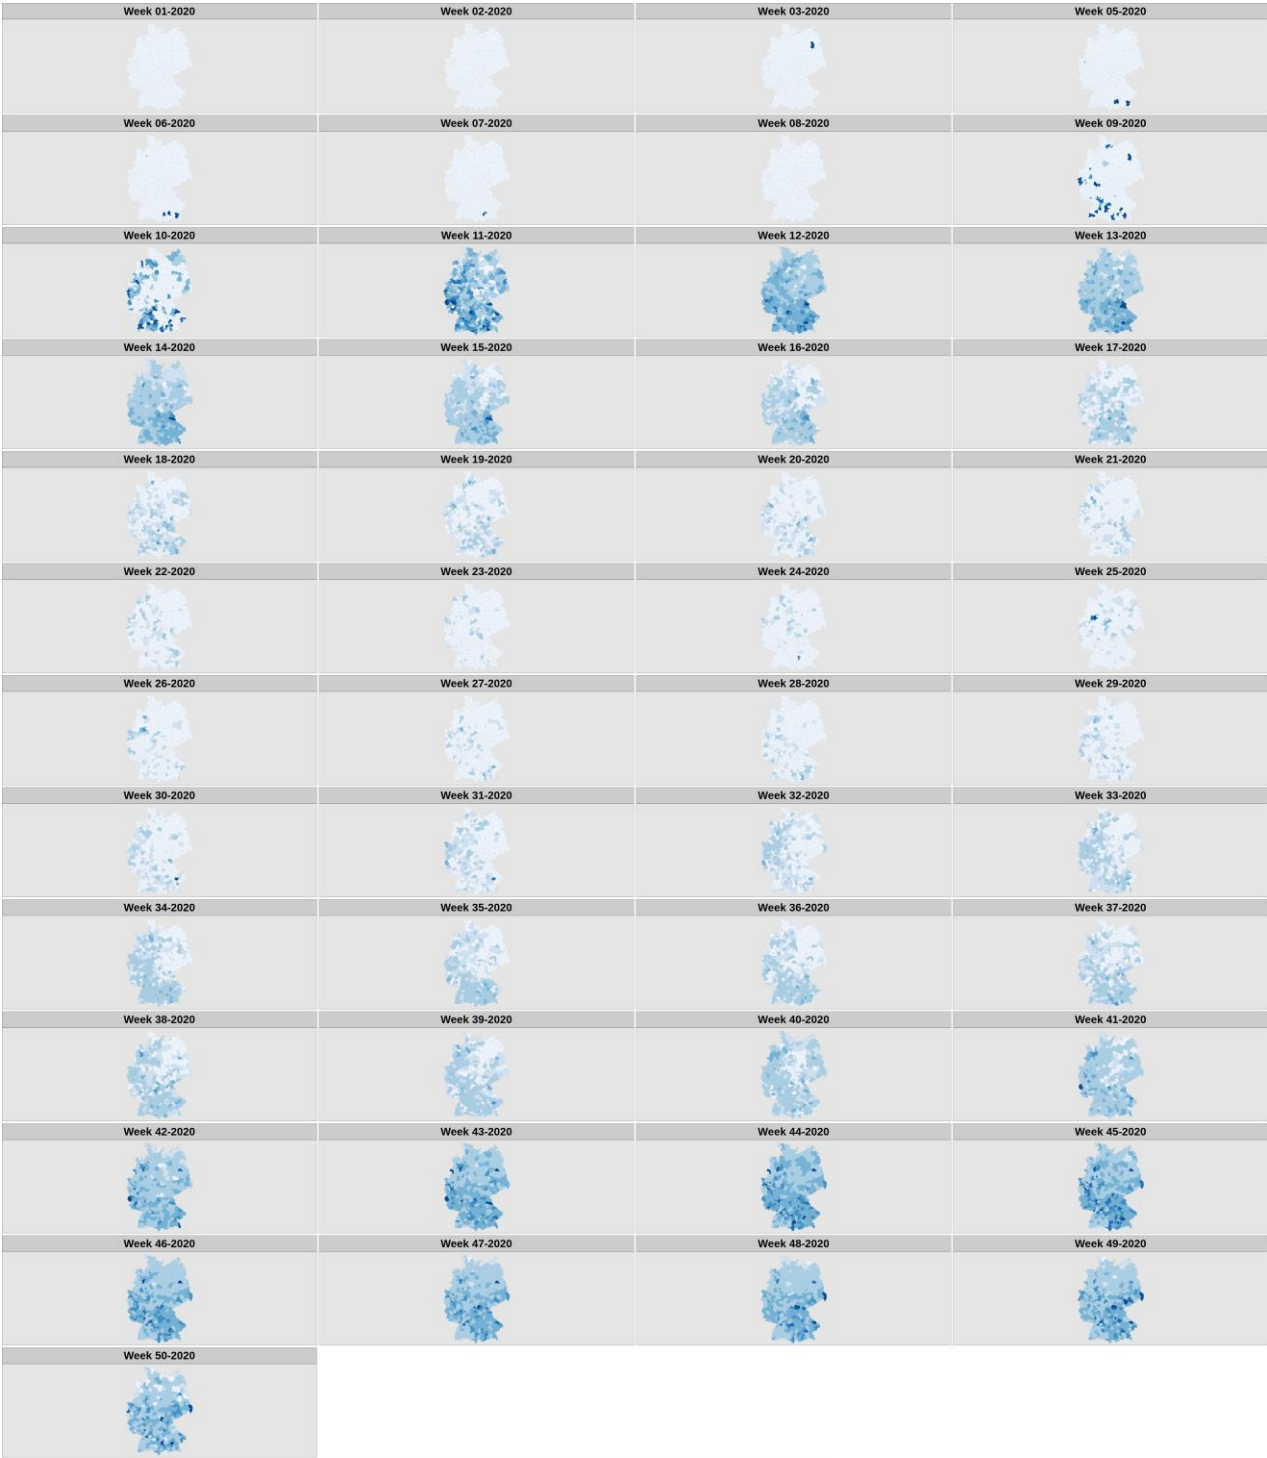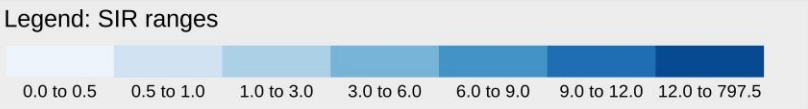

**Figure 3: Age specific standardised incidence ratio (0-4)**

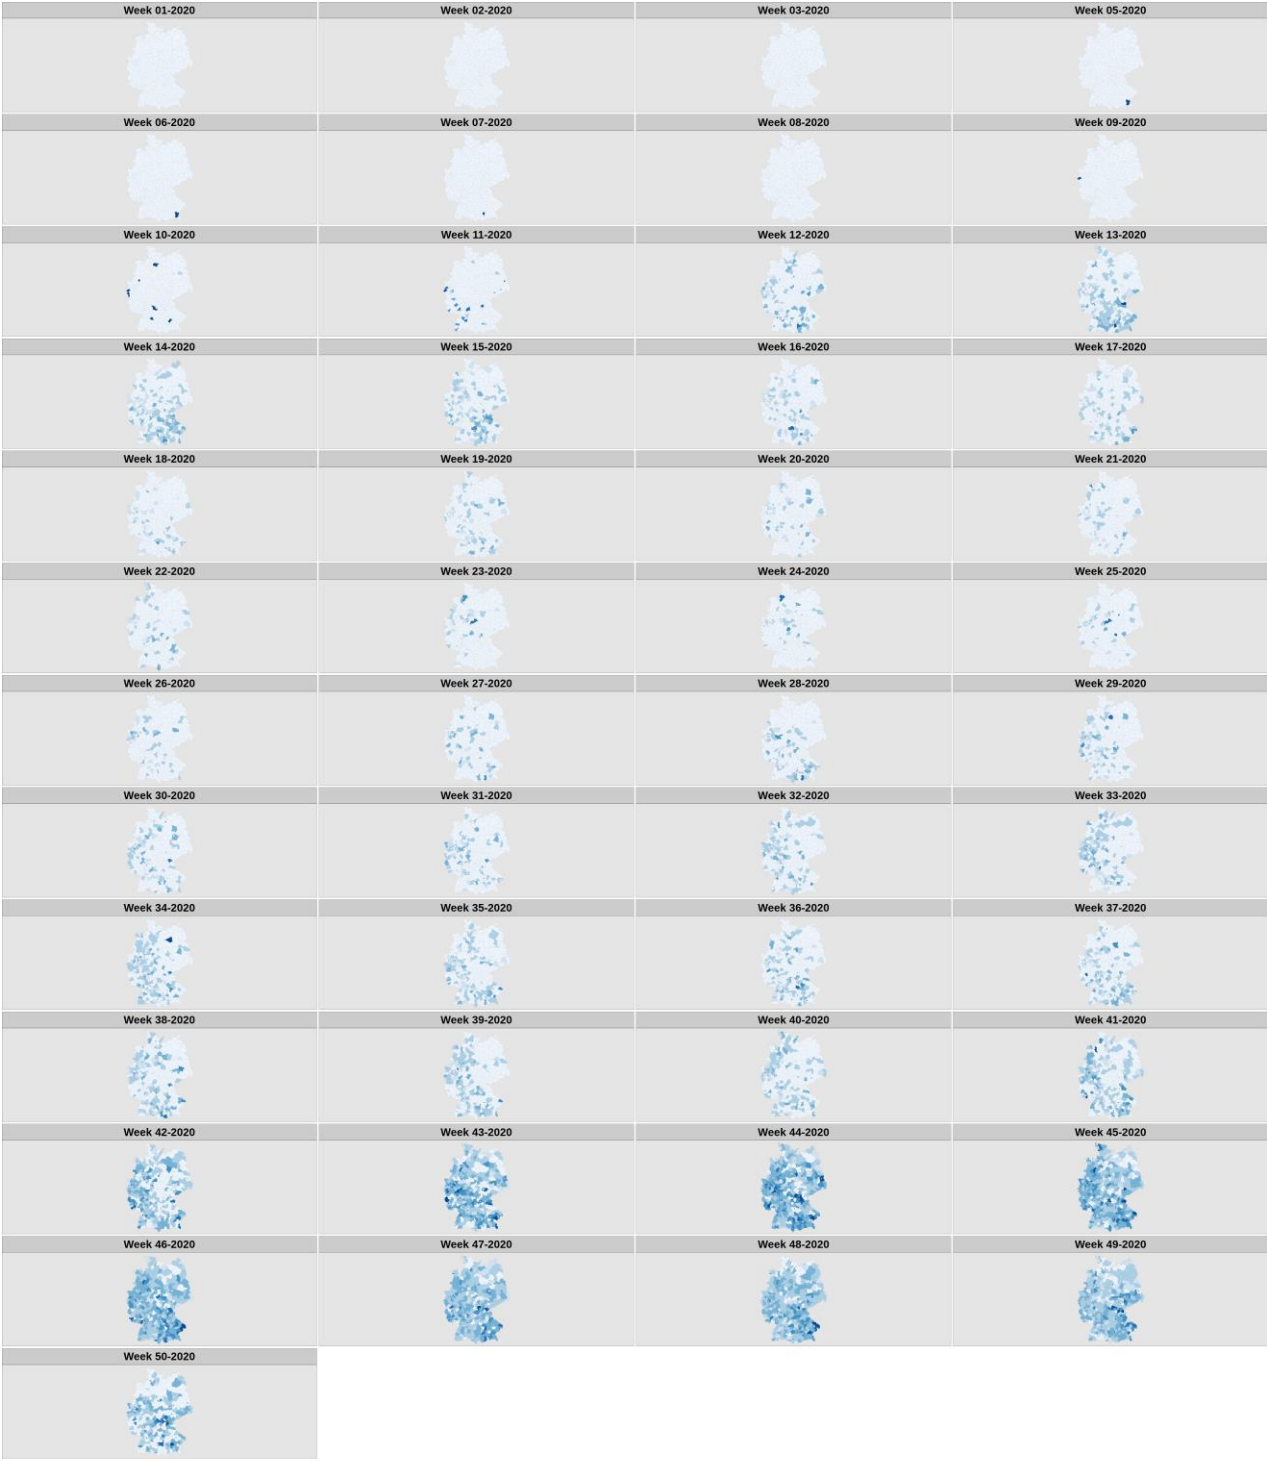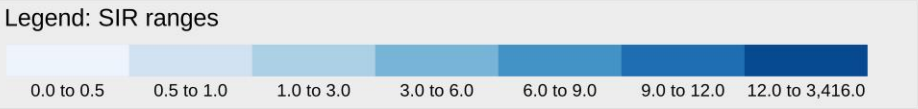

**Figure 4: Age specific standardised incidence ratio (5-14)**

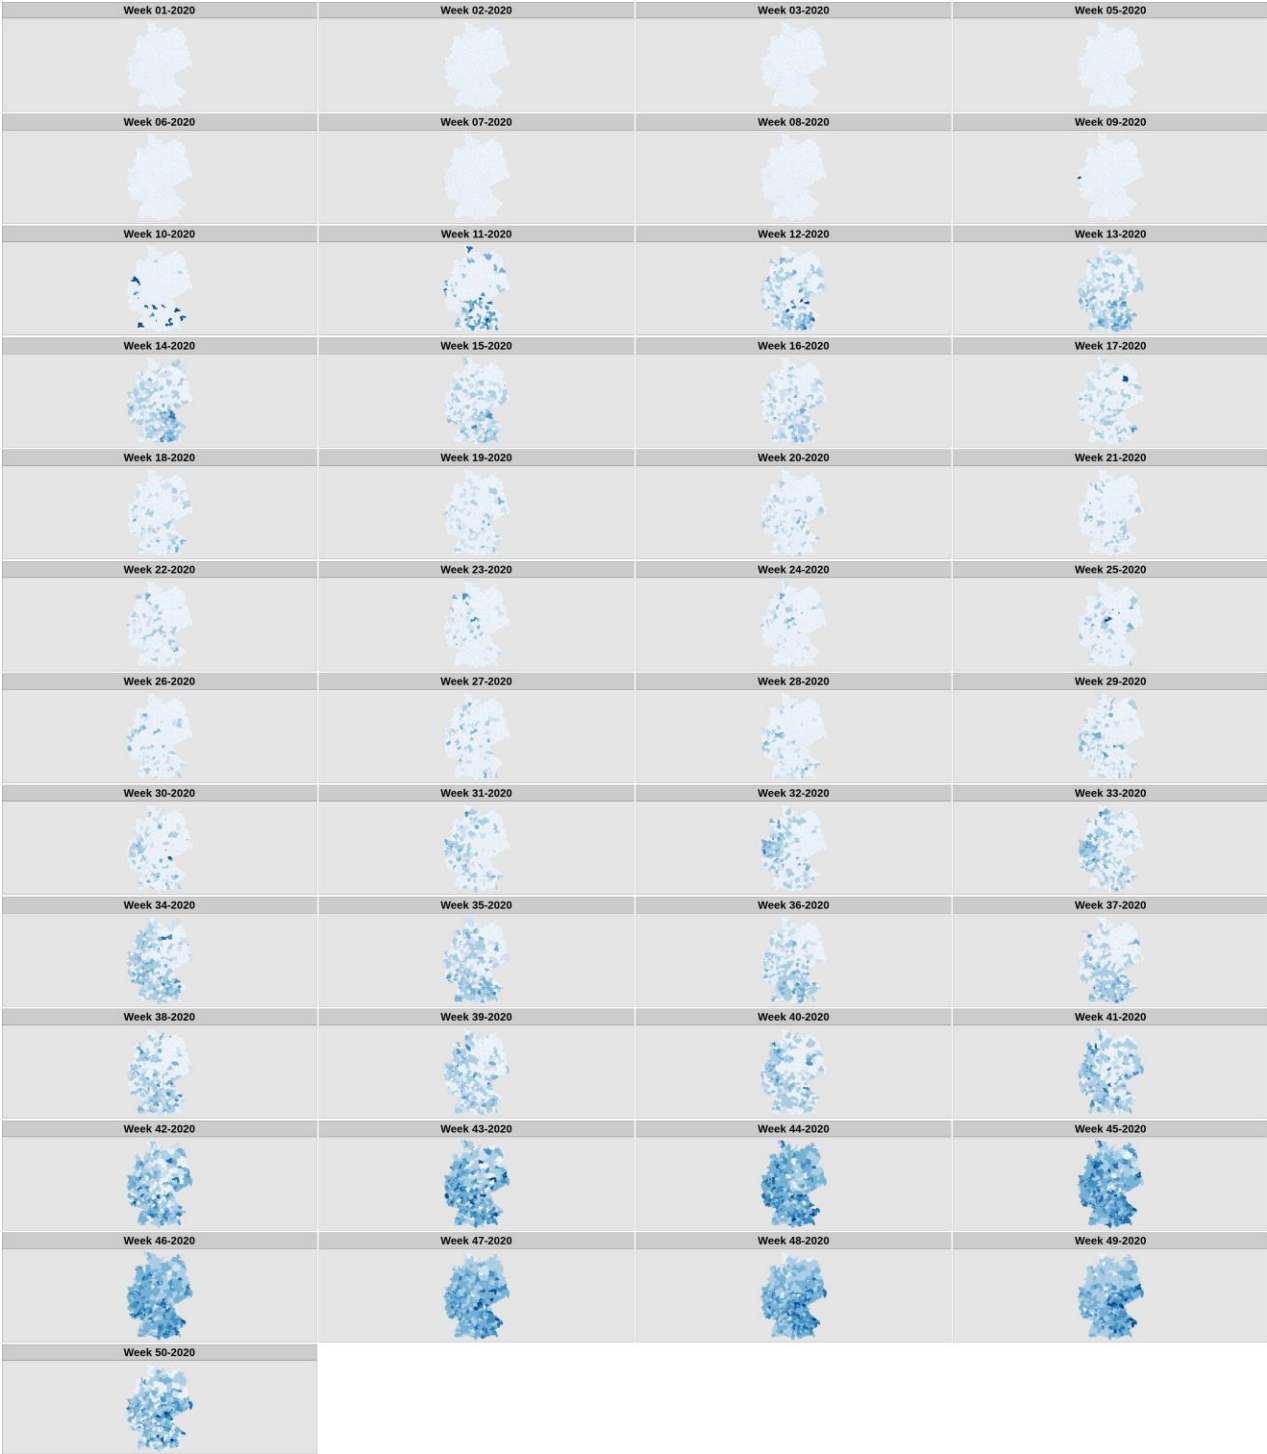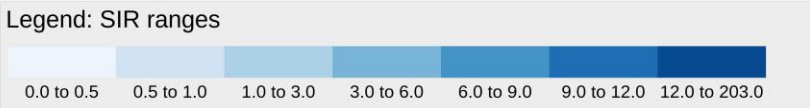

**Figure 5: Age specific standardised incidence ratio (15-34)**

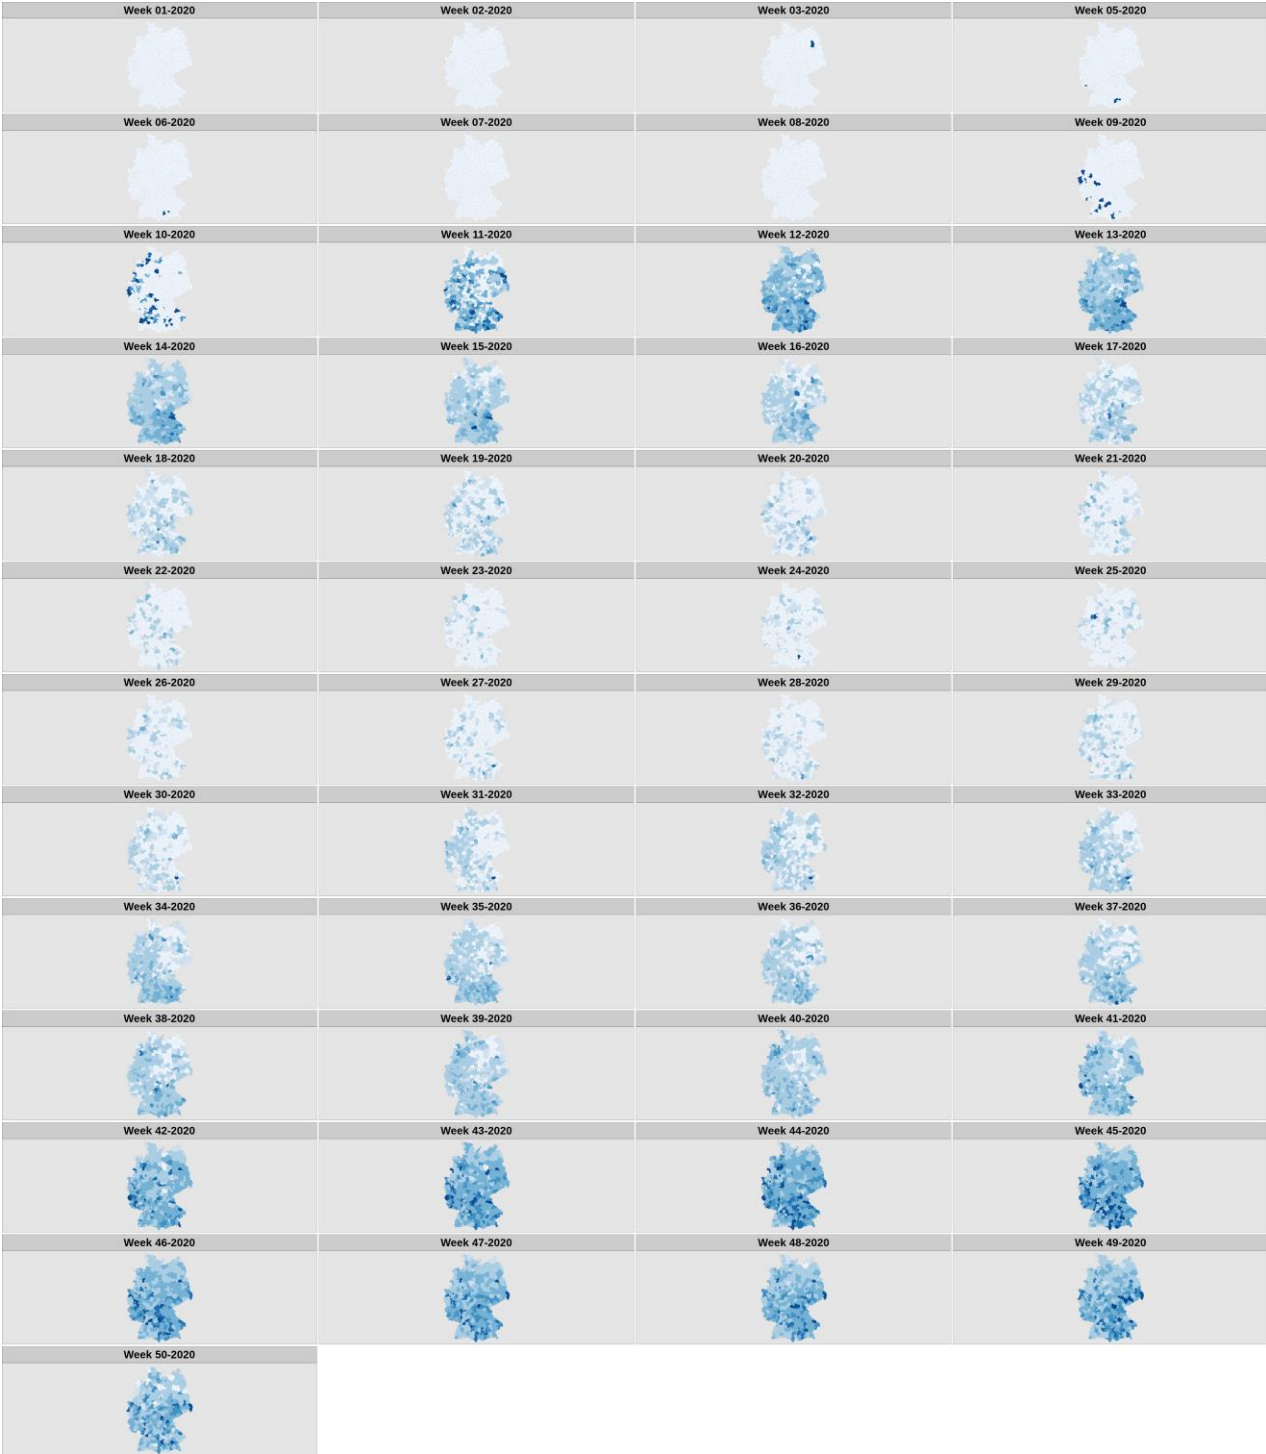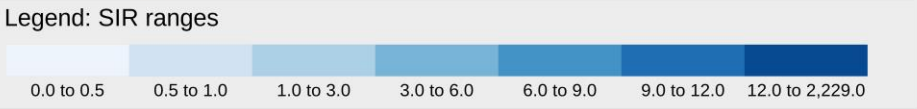



**Figure 6: Age specific standardised incidence ratio (35-59)**

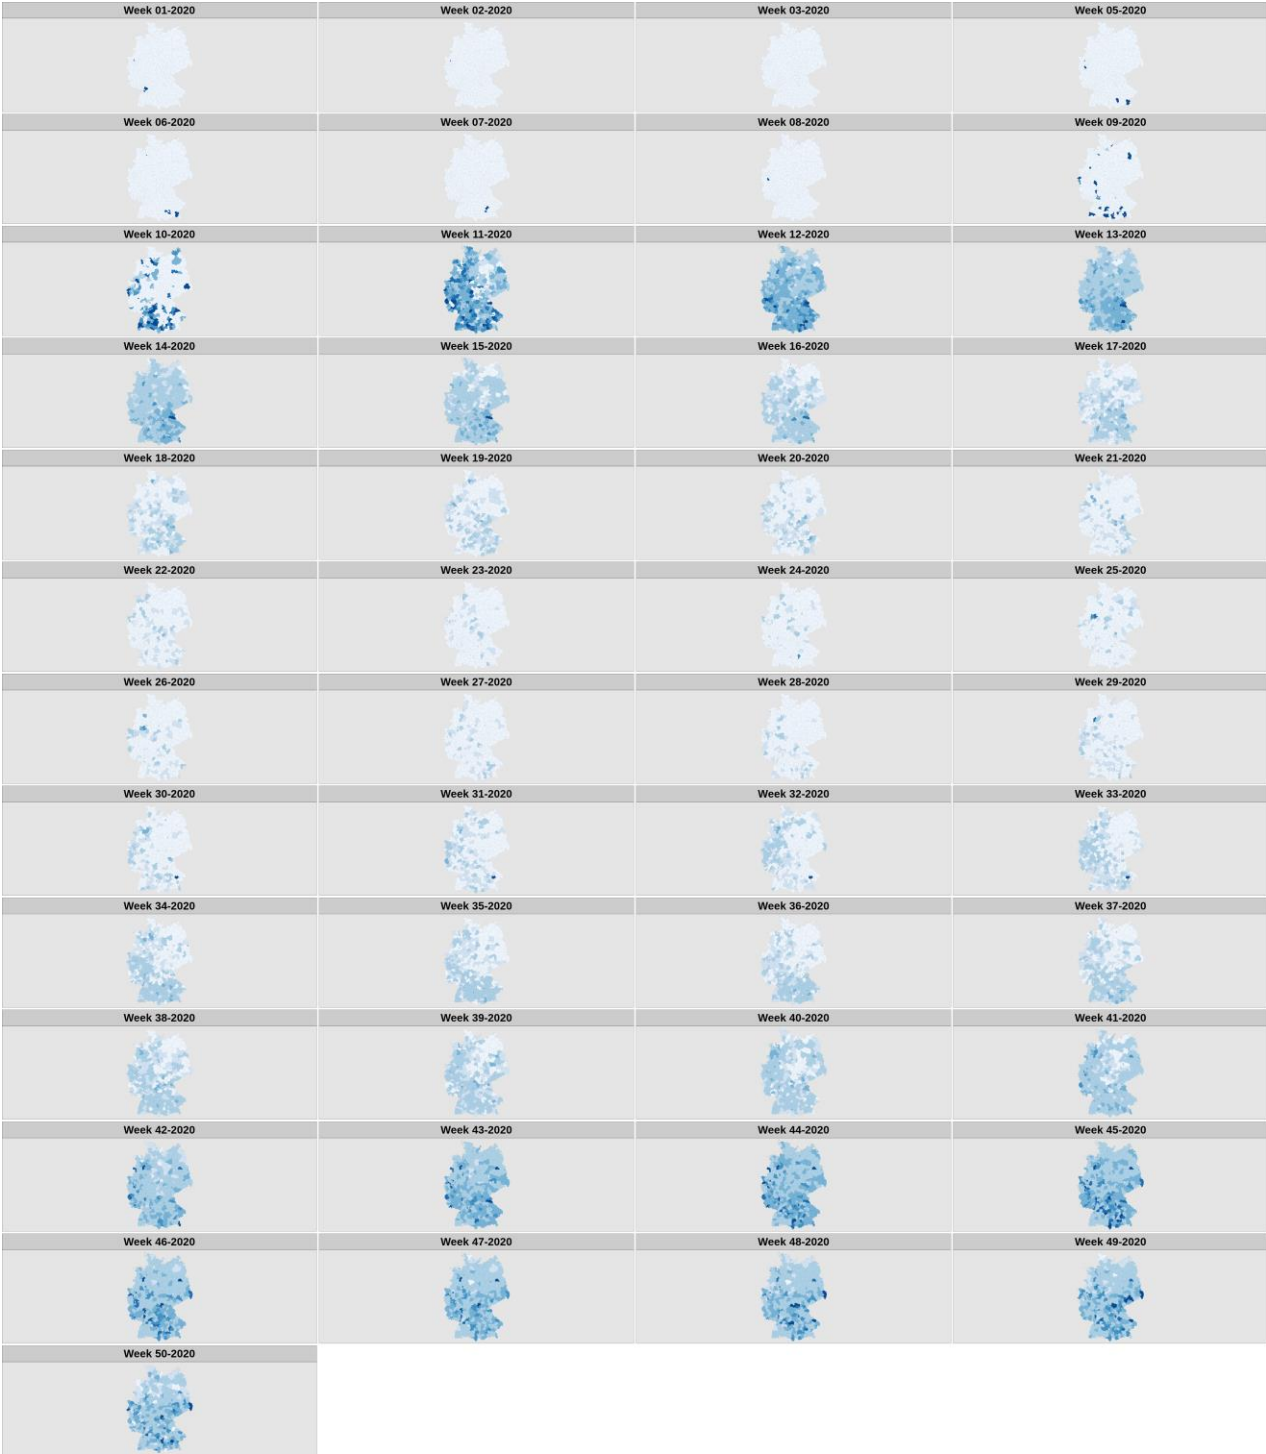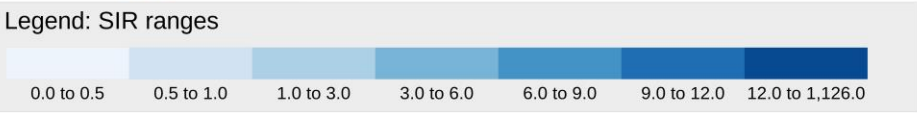

**Figure 7: Age specific standardised incidence ratio (60-79)**

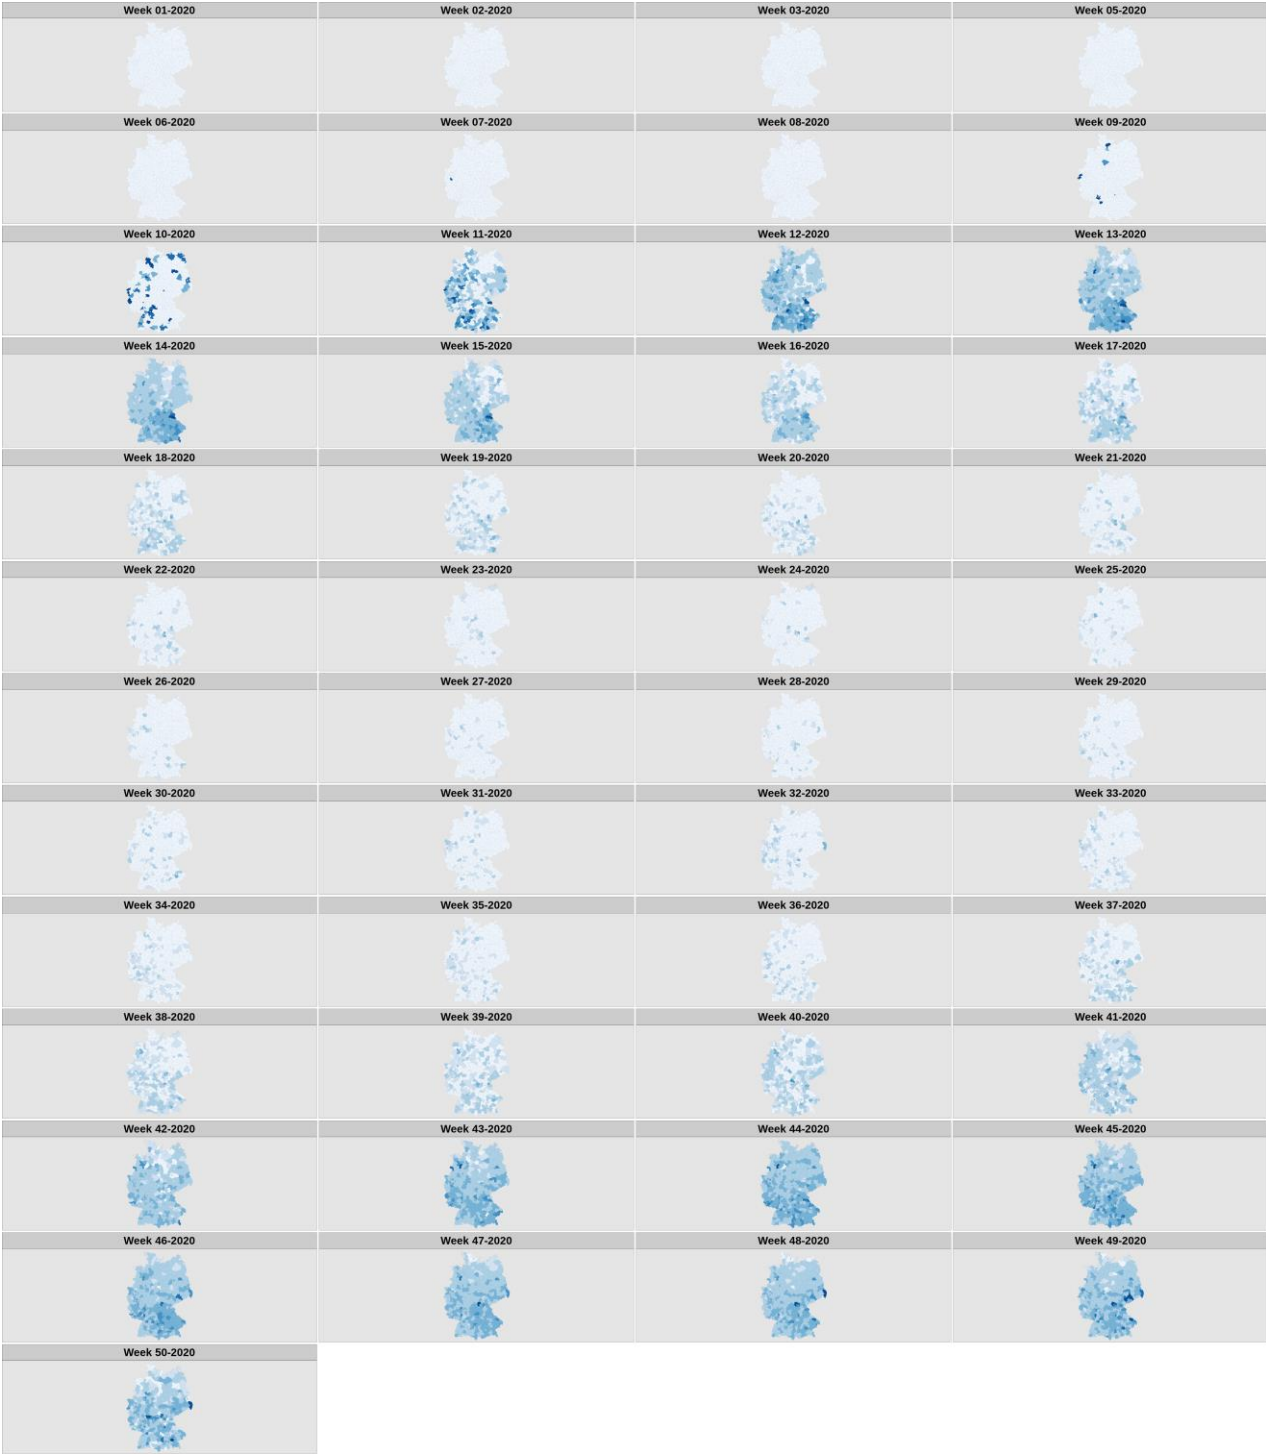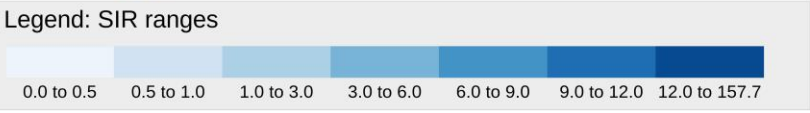

**Figure 8: Age specific standardised incidence ratio (80+)**

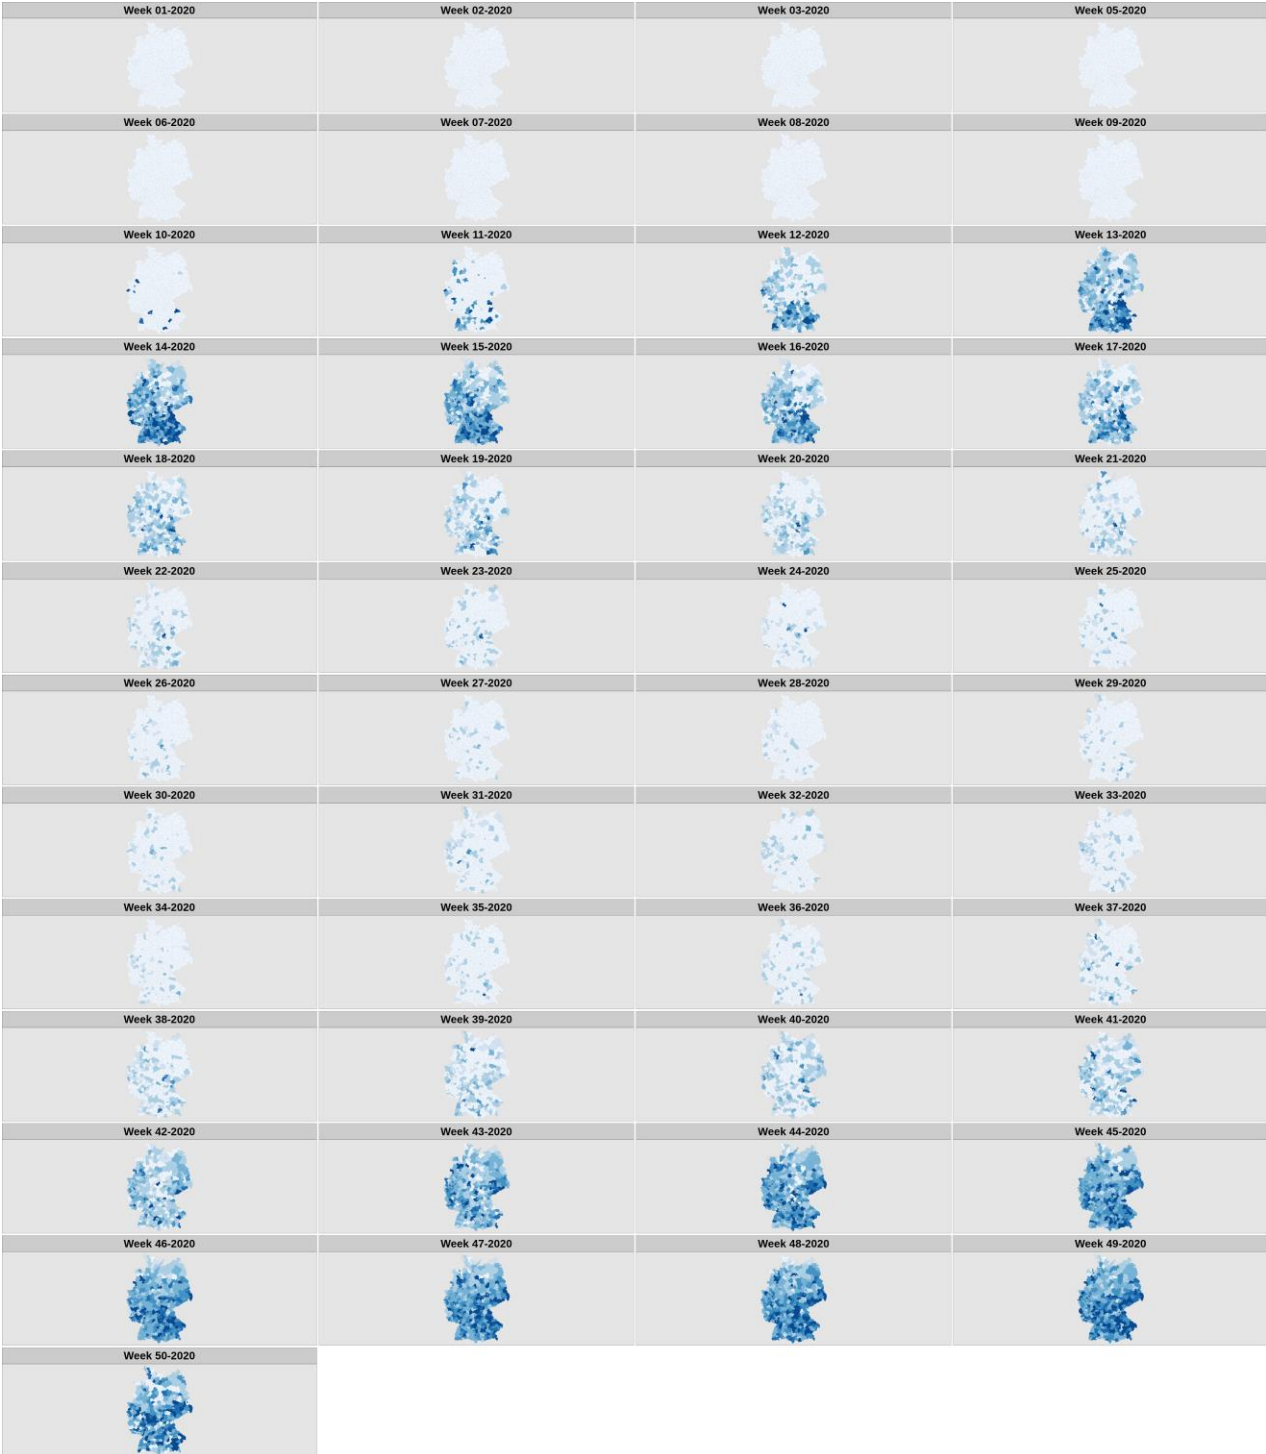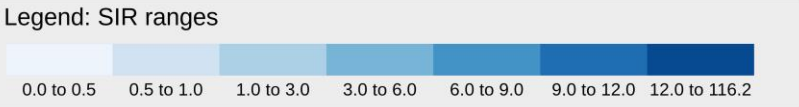



**Figure 9: Sex specific standardised mortality ratio (female)**

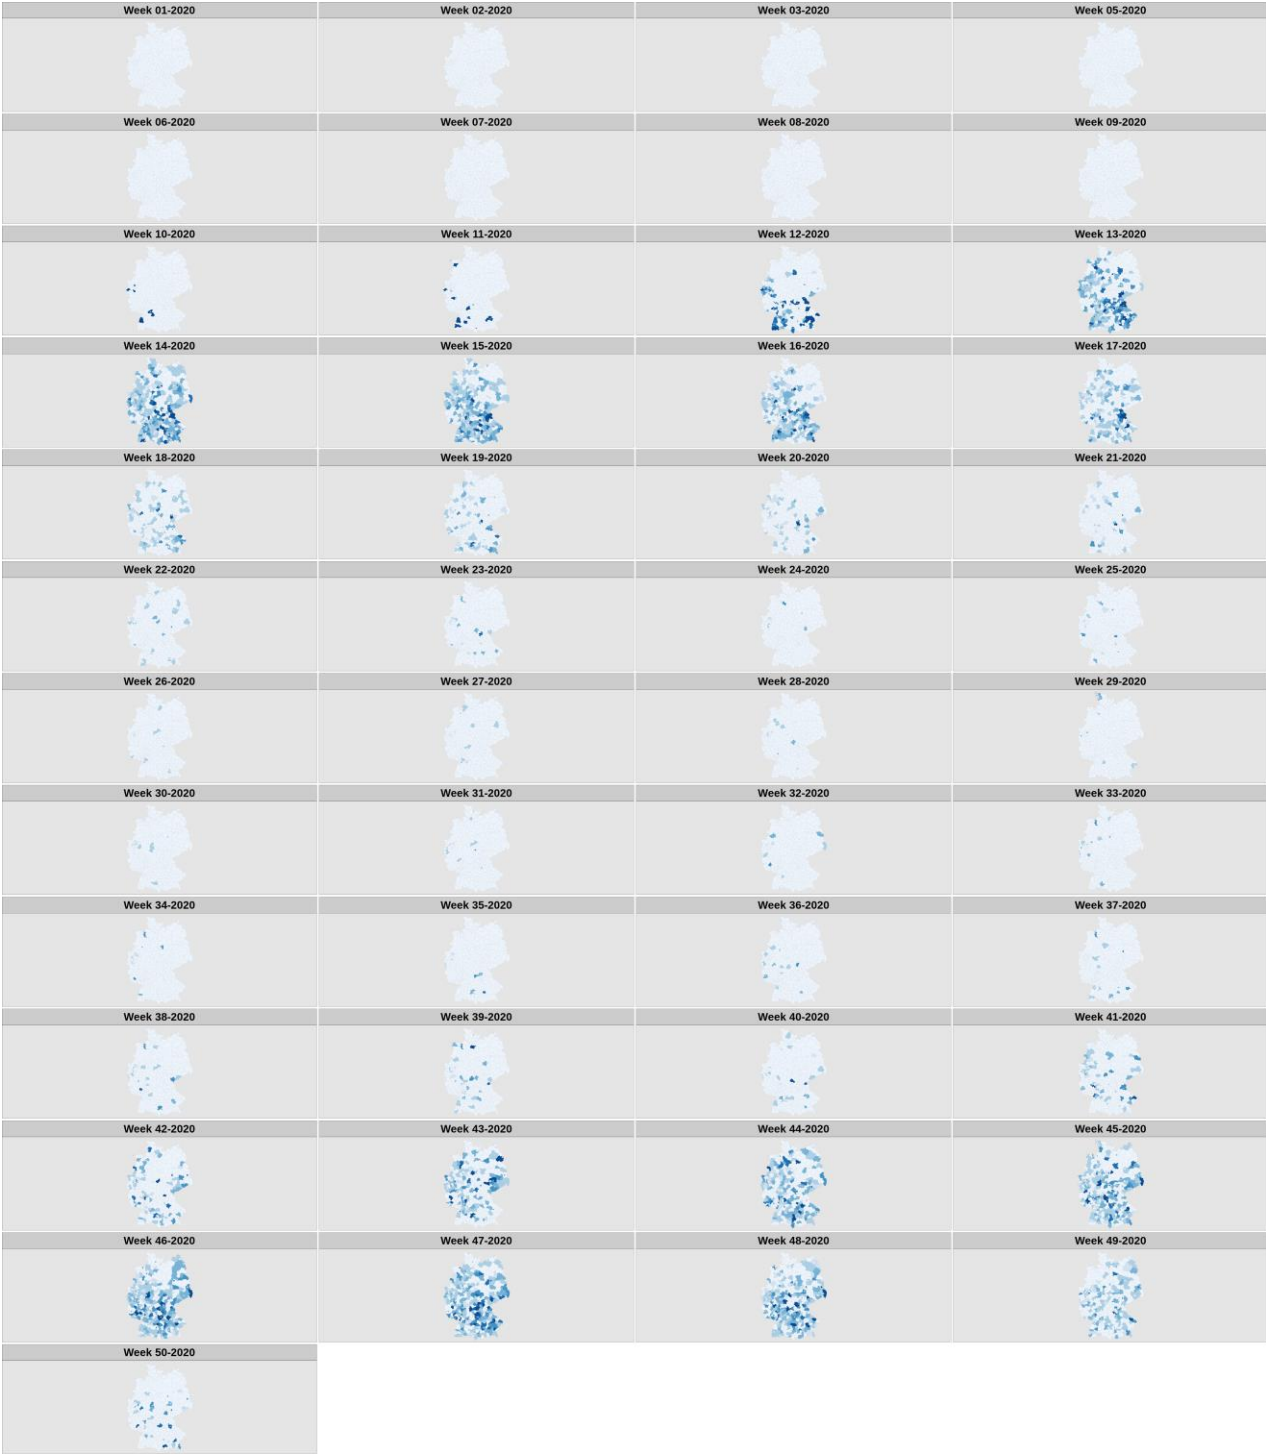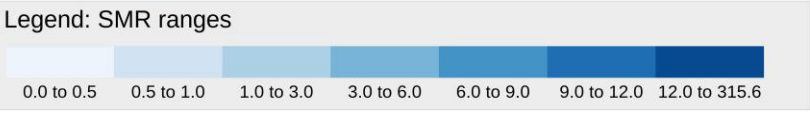

**Figure 10: Sex specific standardised mortality ratio (male)**

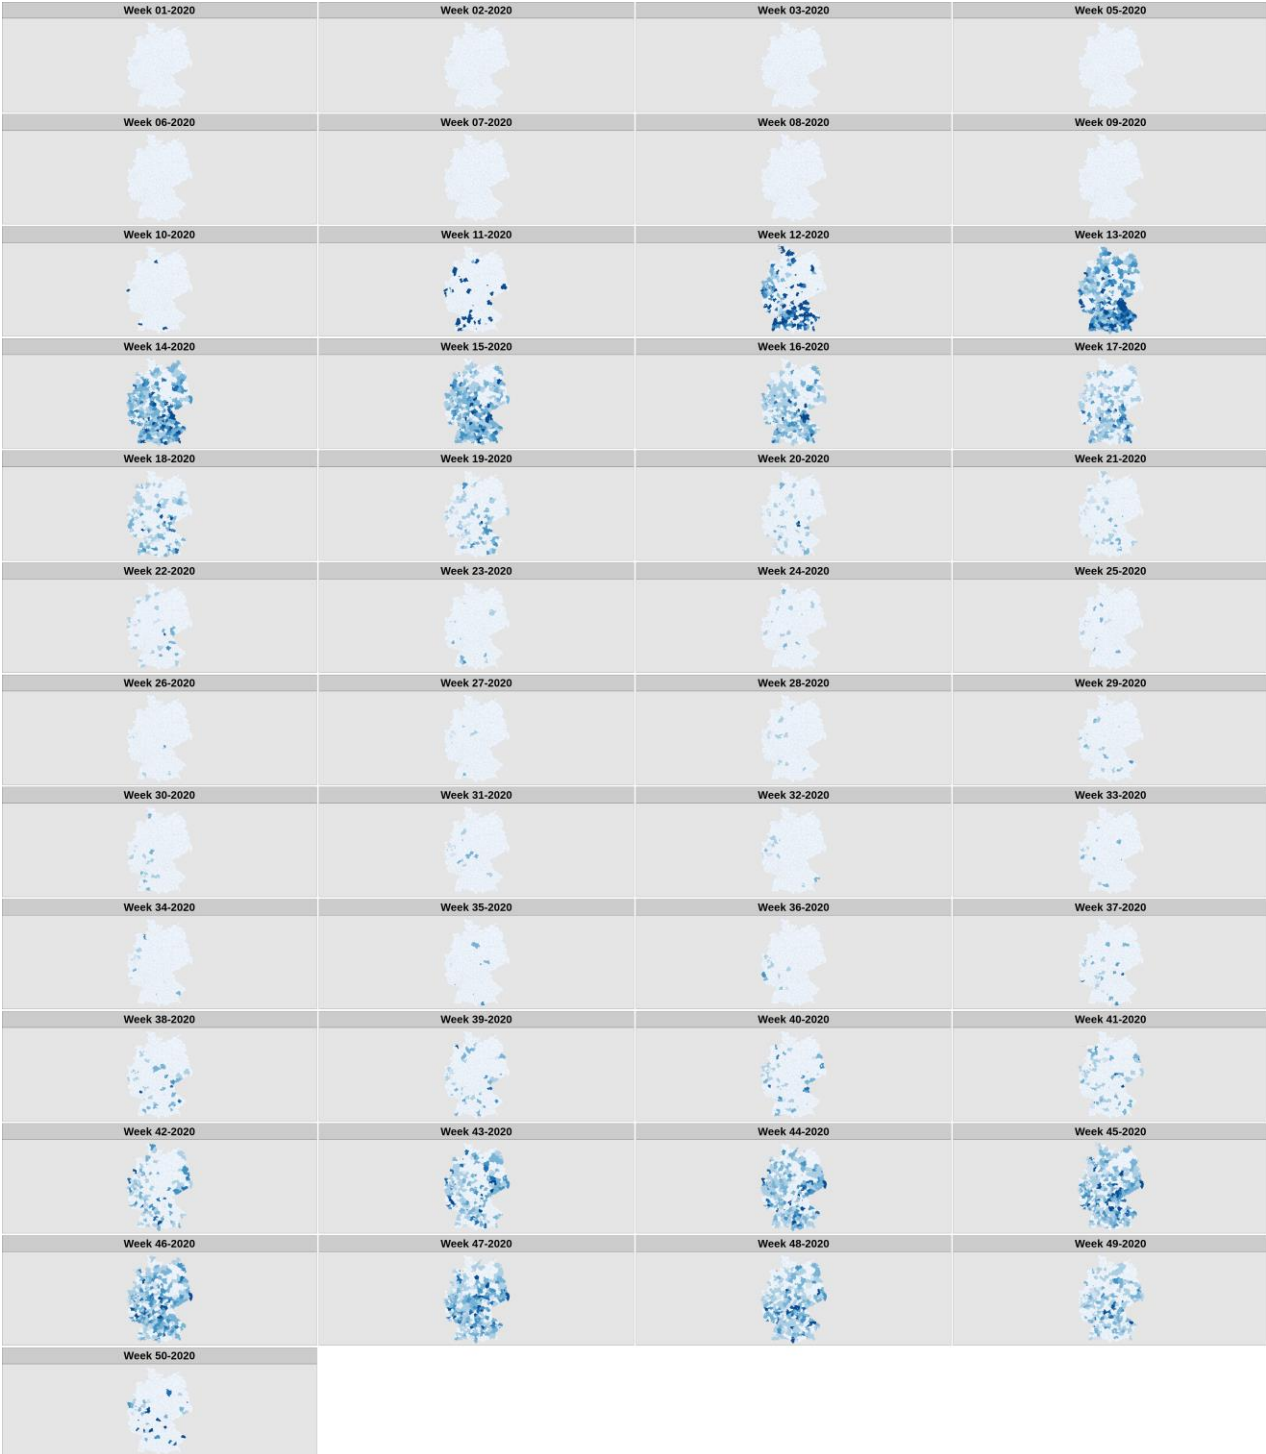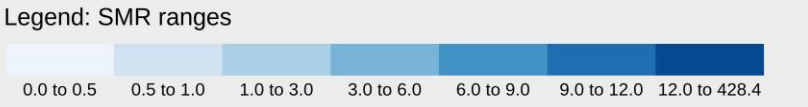

**Figure 11: Age specific standardised mortality ratio (0-4)**

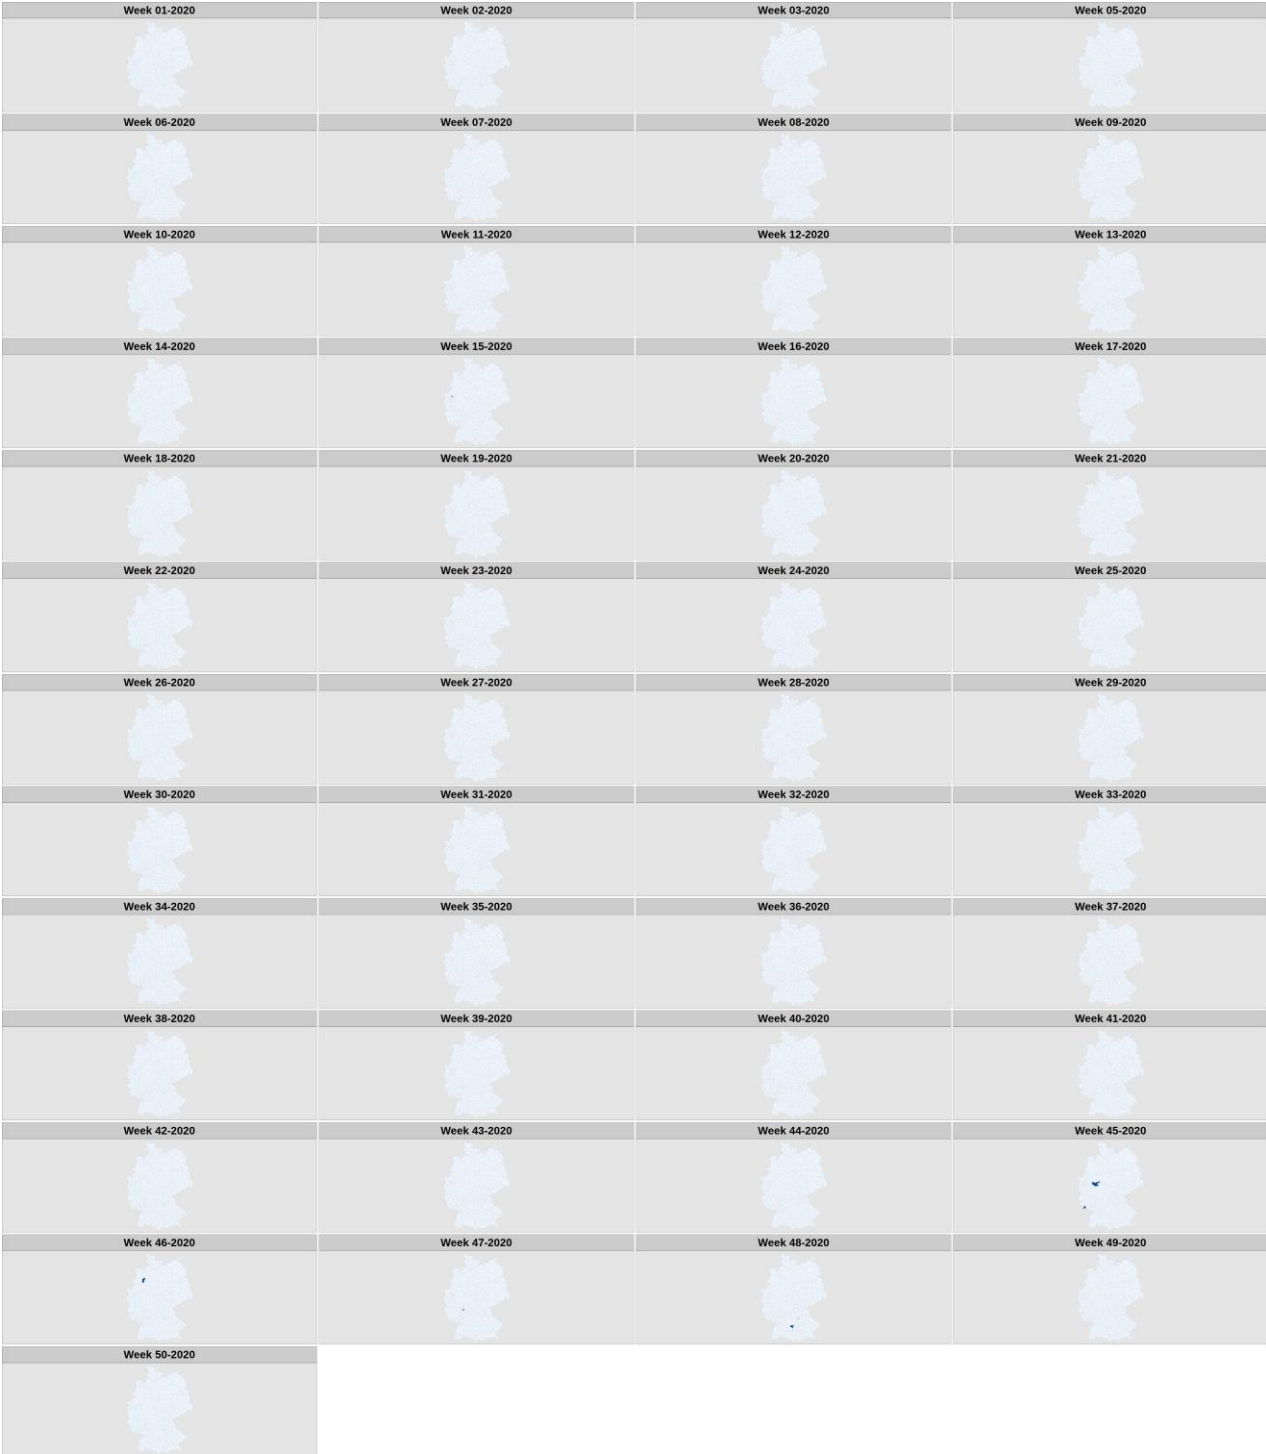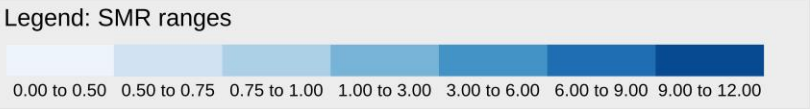

**Figure 12: Age specific standardised mortality ratio (5-14)**

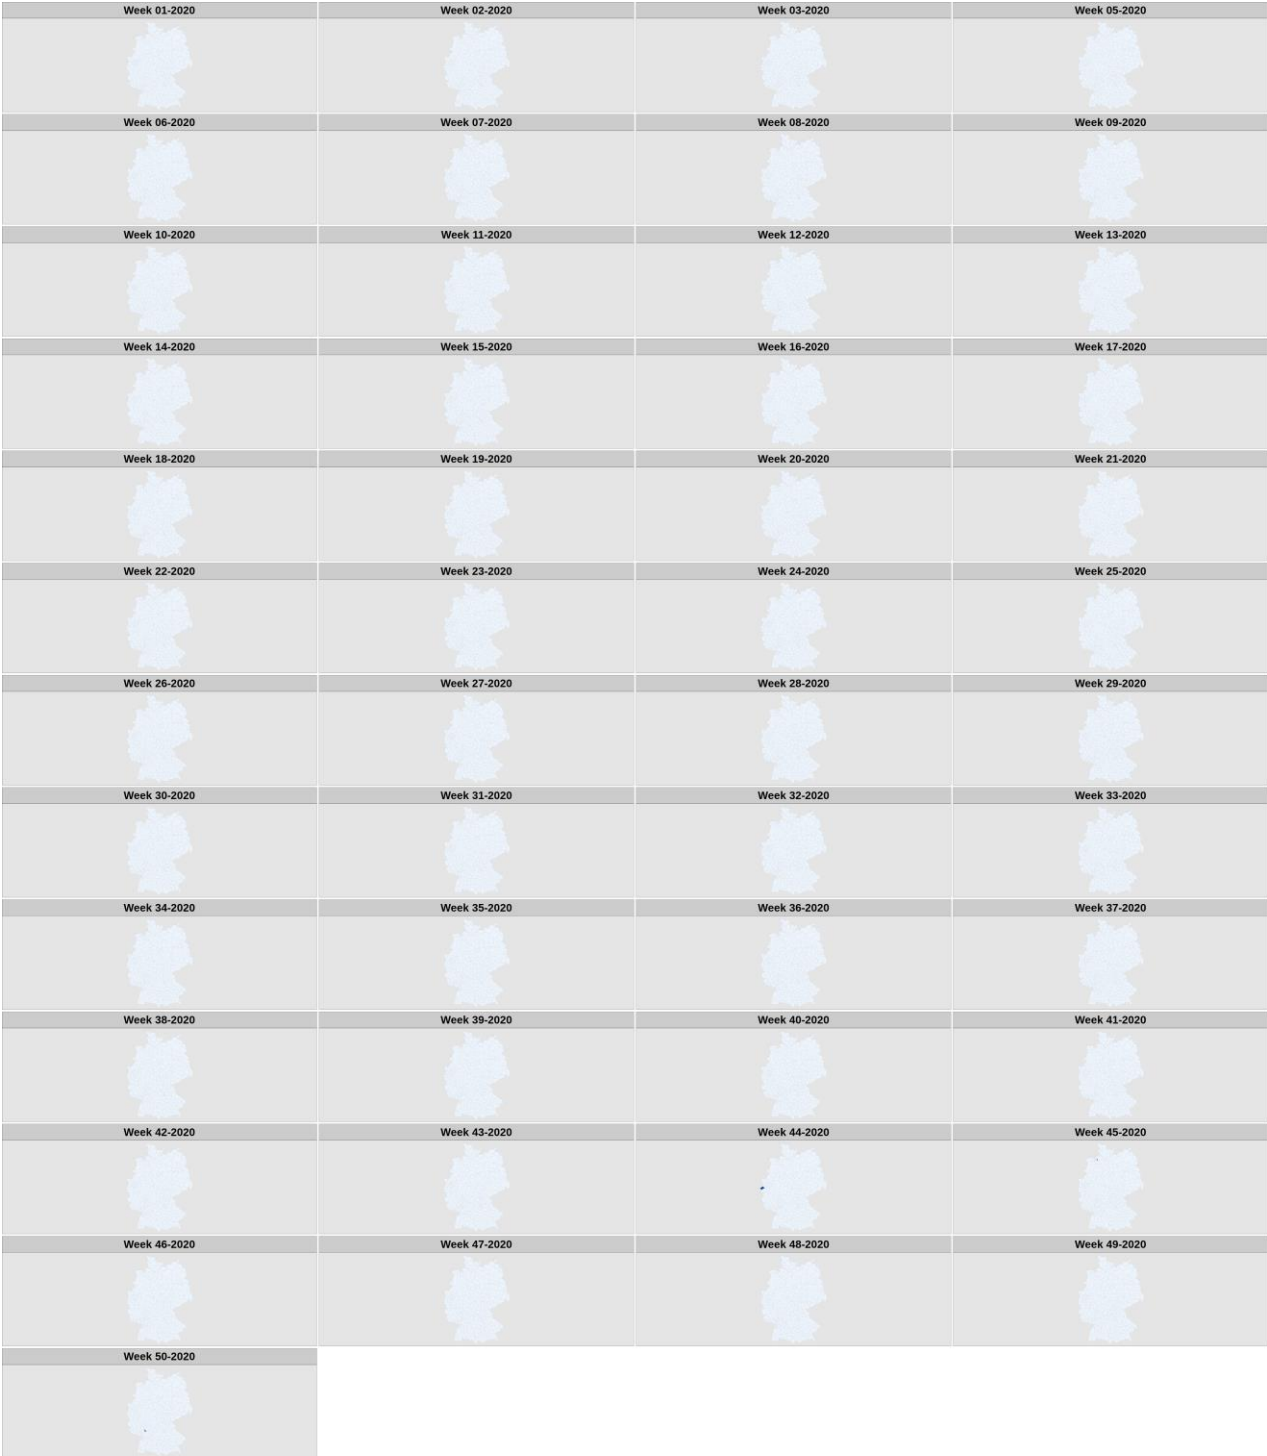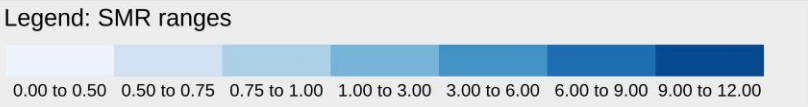

**Figure 13: Age specific standardised mortality ratio (15-34)**

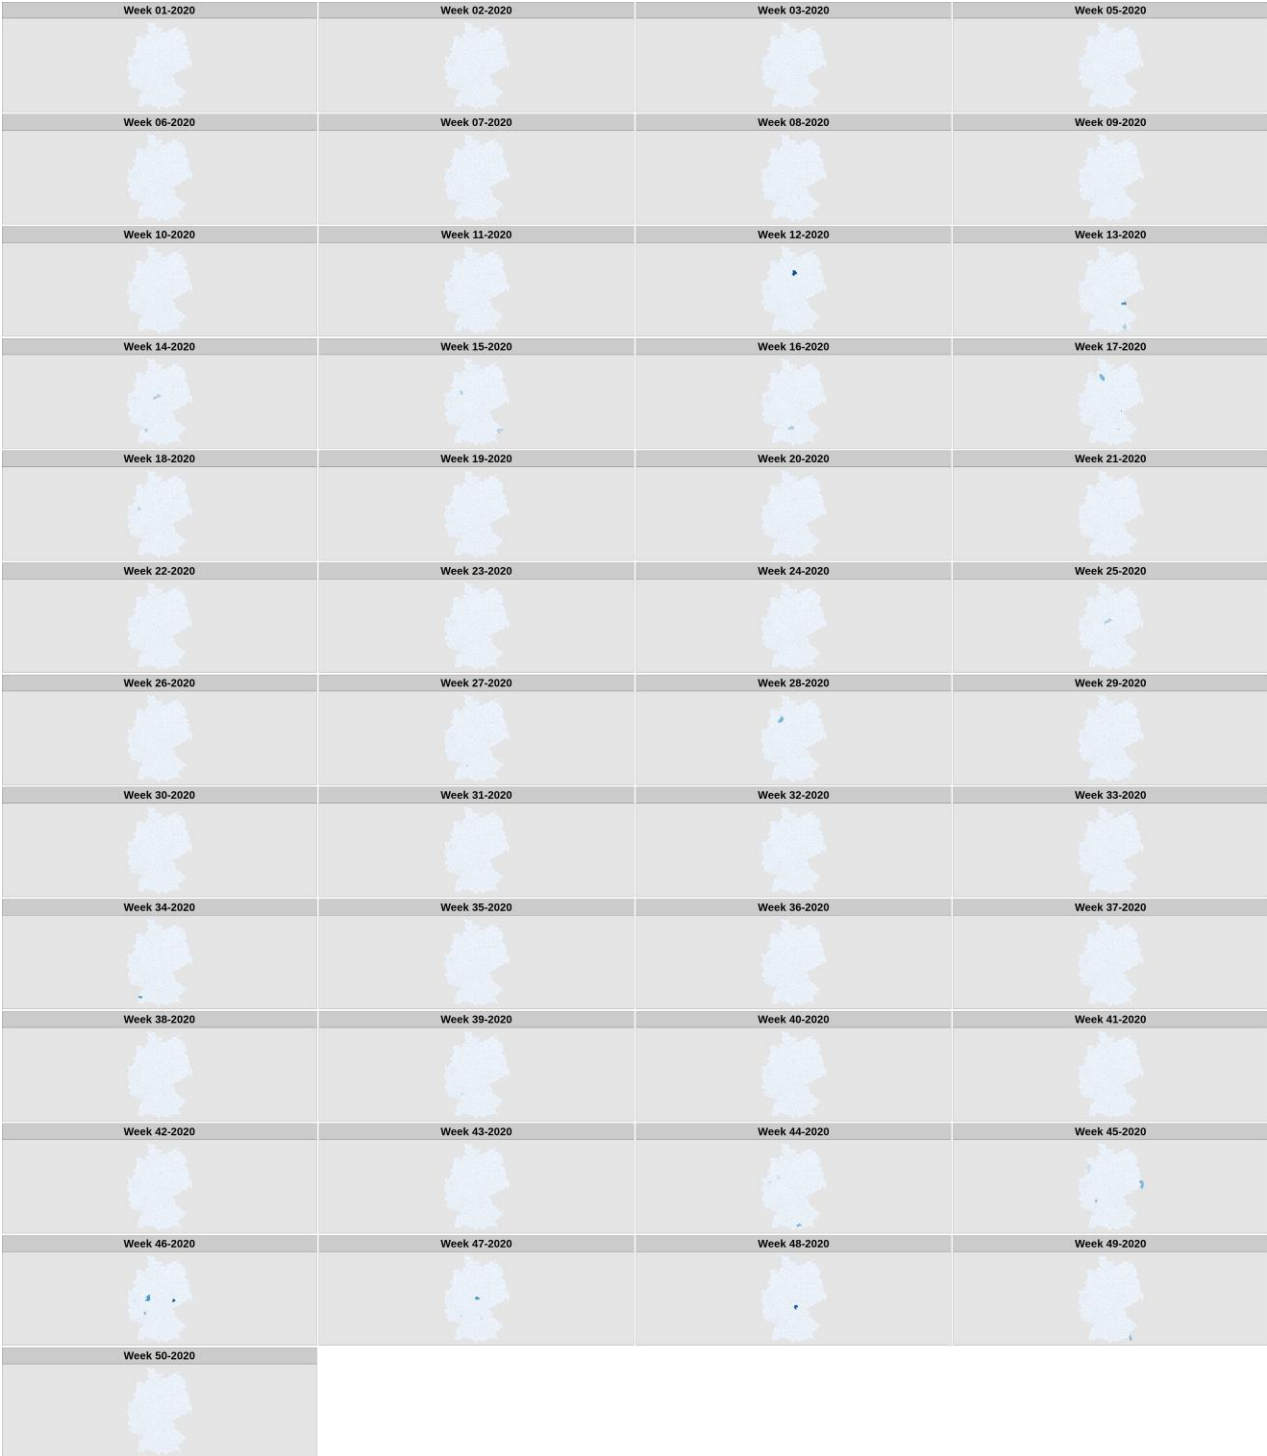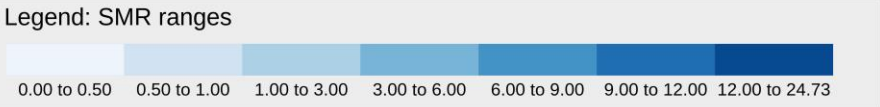



**Figure 14: Age specific standardised mortality ratio (35-59)**

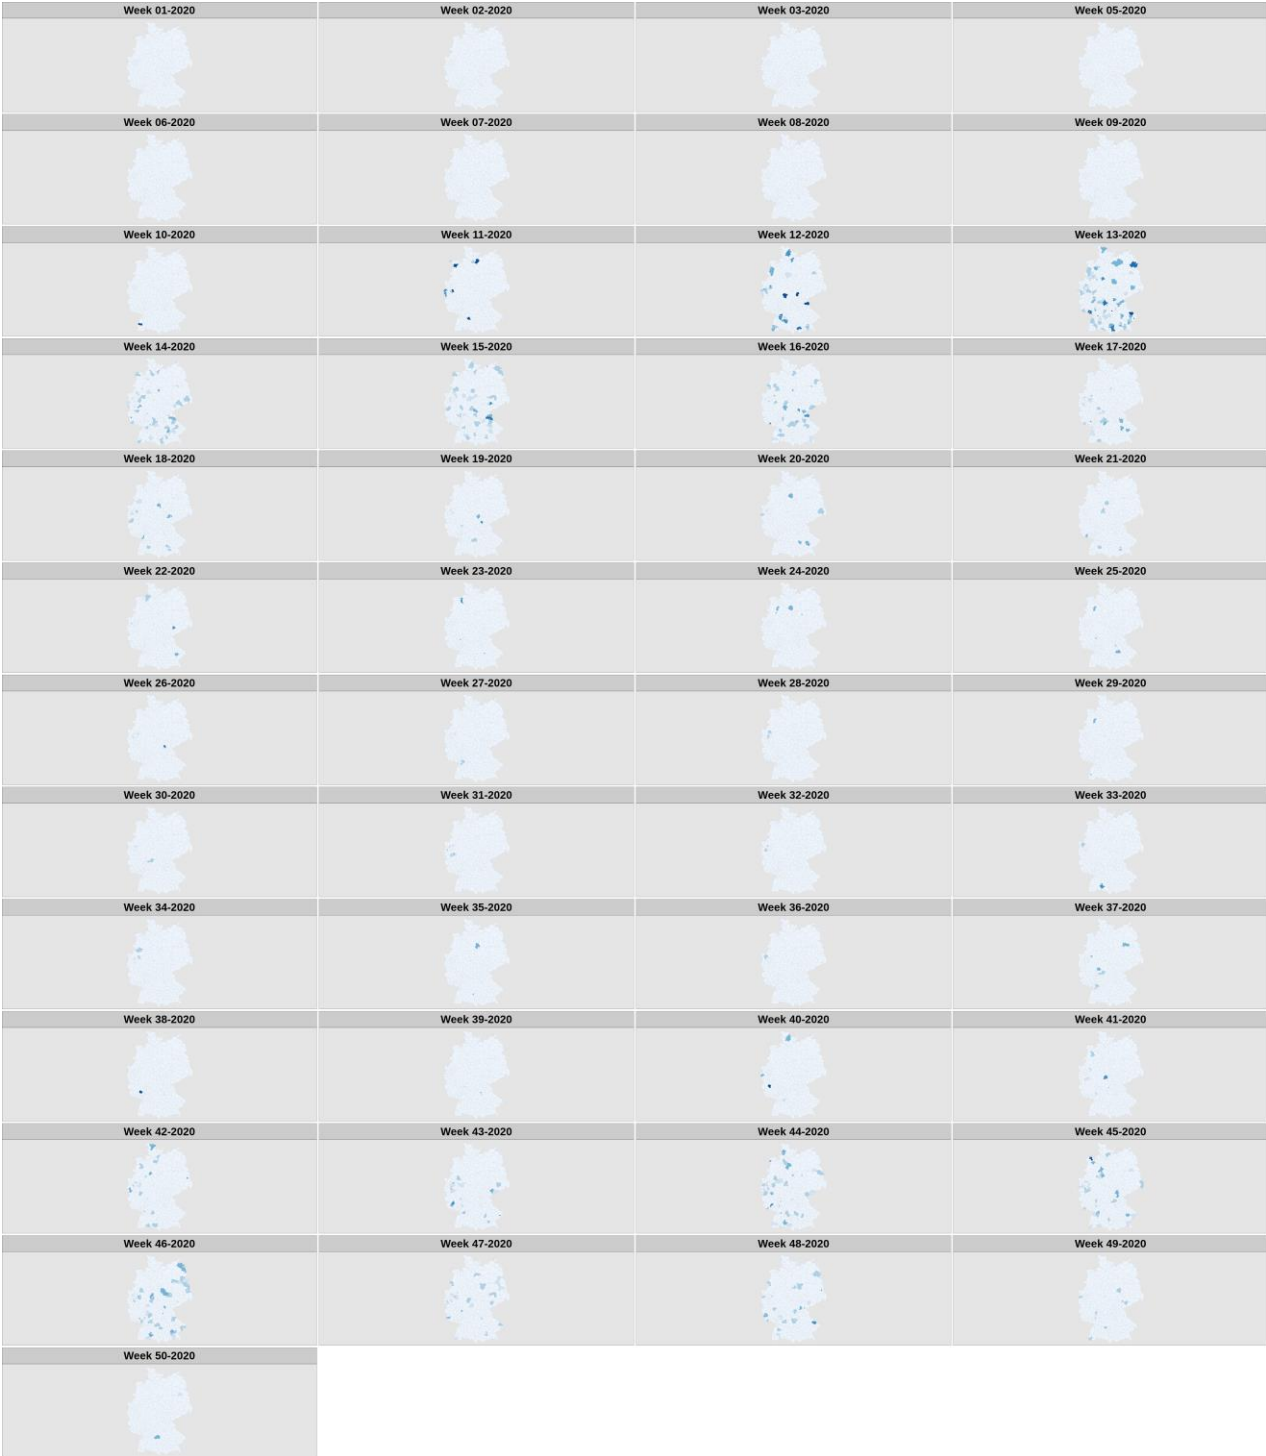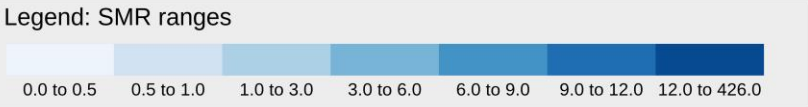

**Figure 15: Age specific standardised mortality ratio (60-79)**

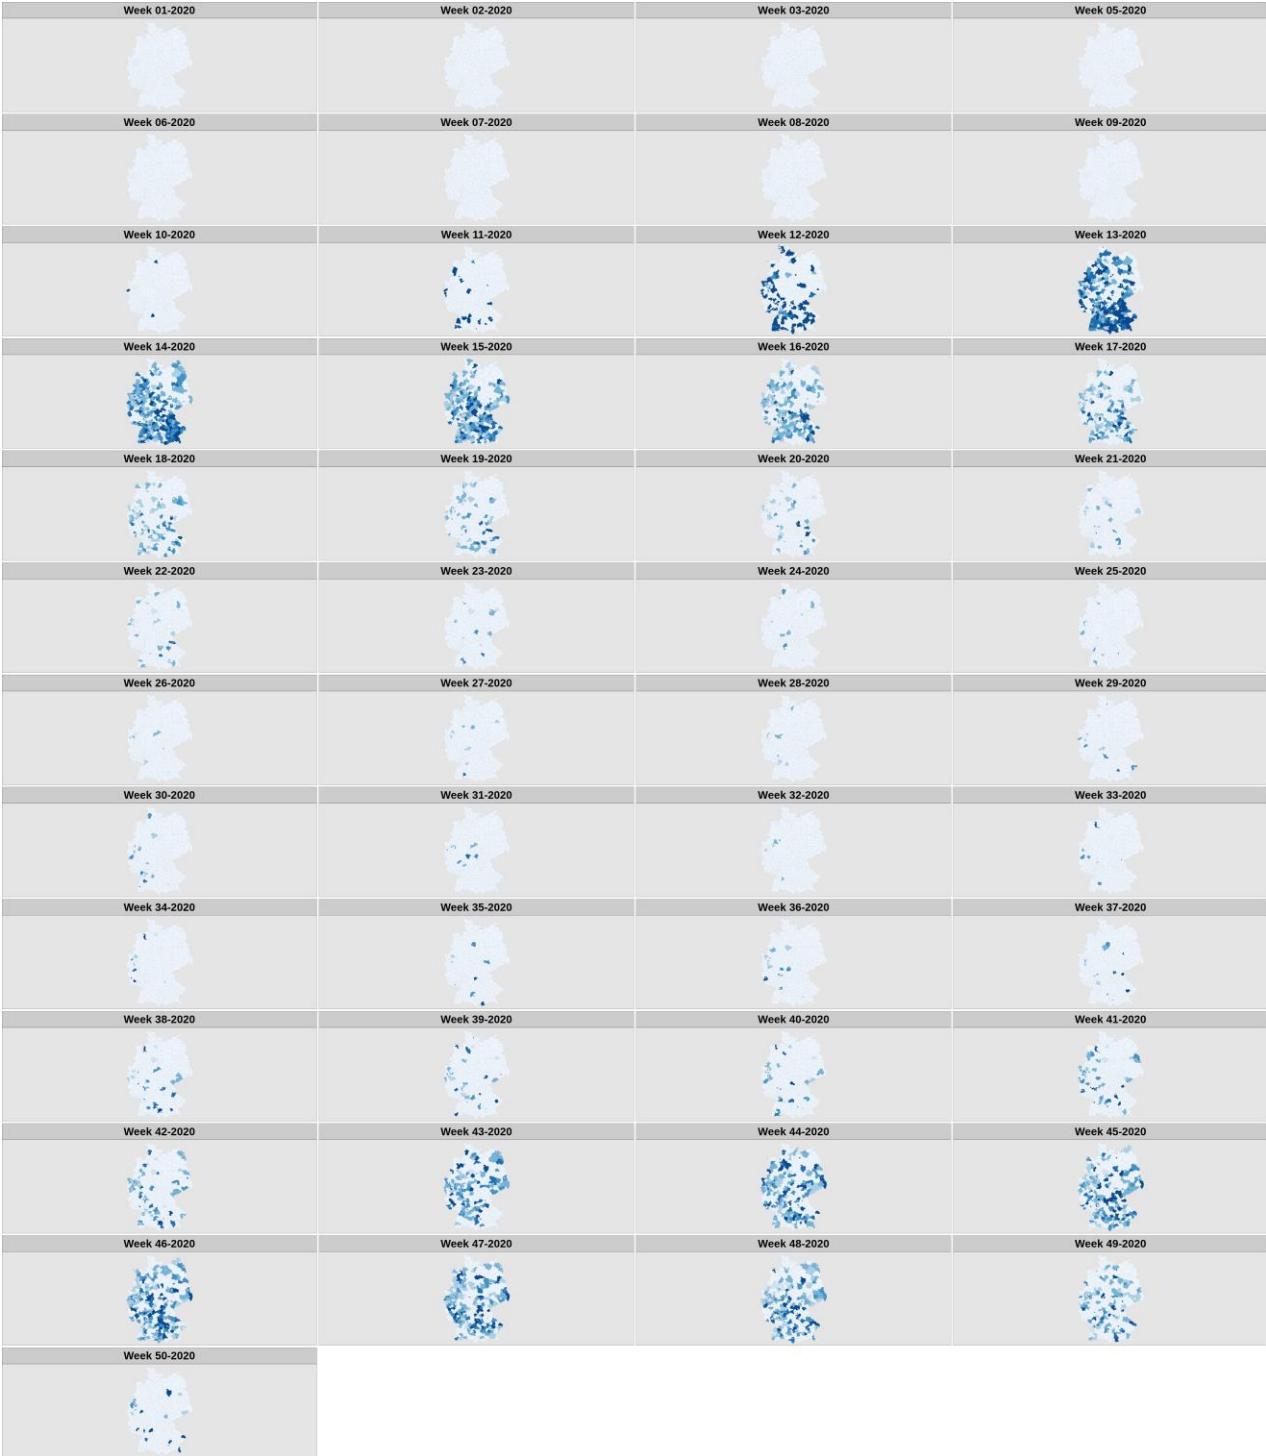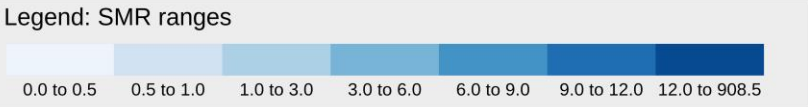

**Figure 16: Age specific standardised mortality ratio (80+)**

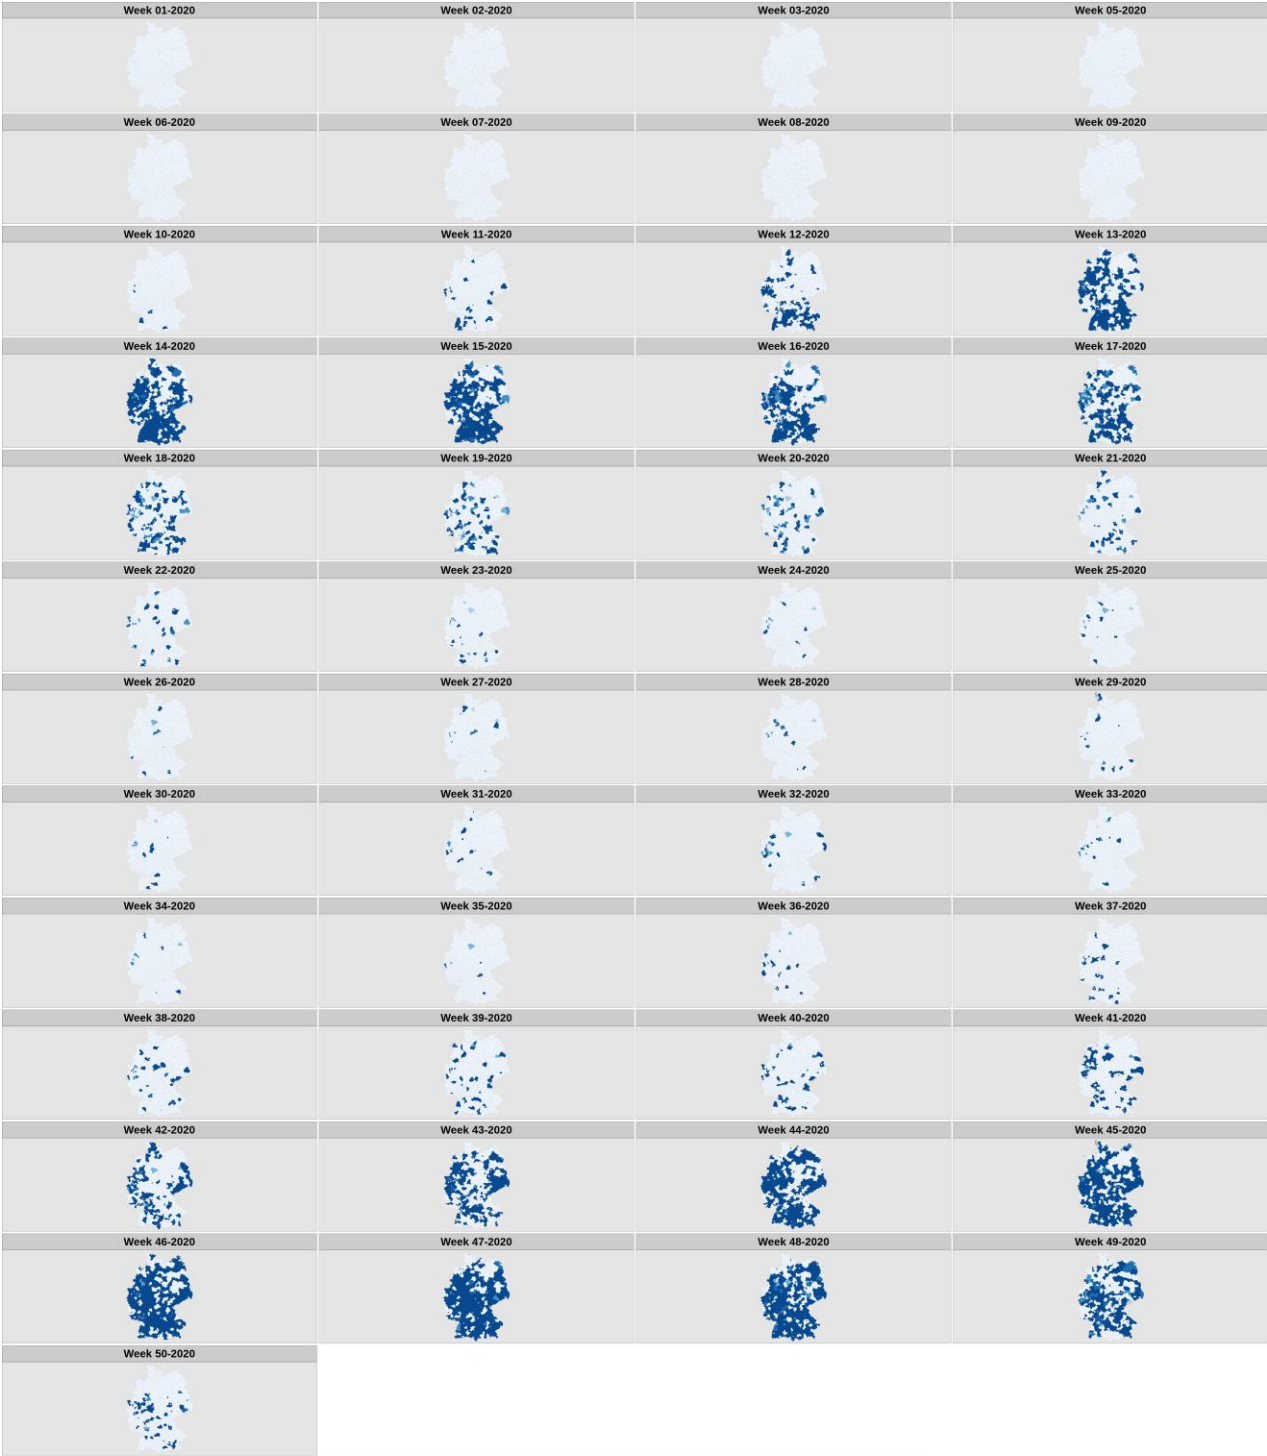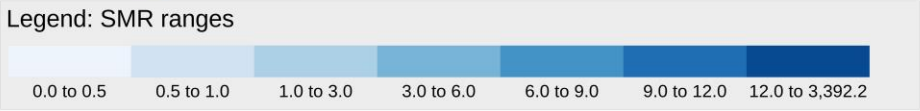

**Figure 17: Sex specific standardised incidence and mortality ratios over notification weeks**

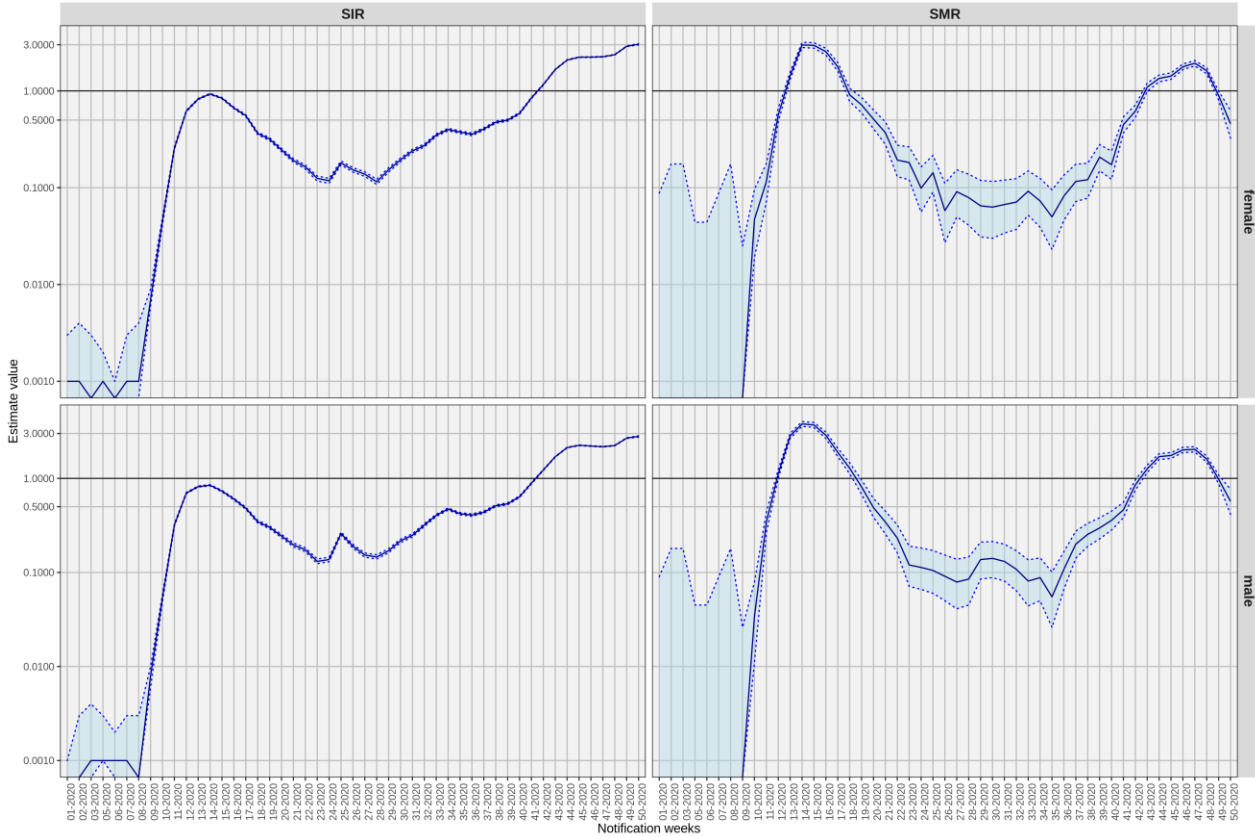

**Figure 18: Age specific standardised incidence and mortality ratios over notification weeks**

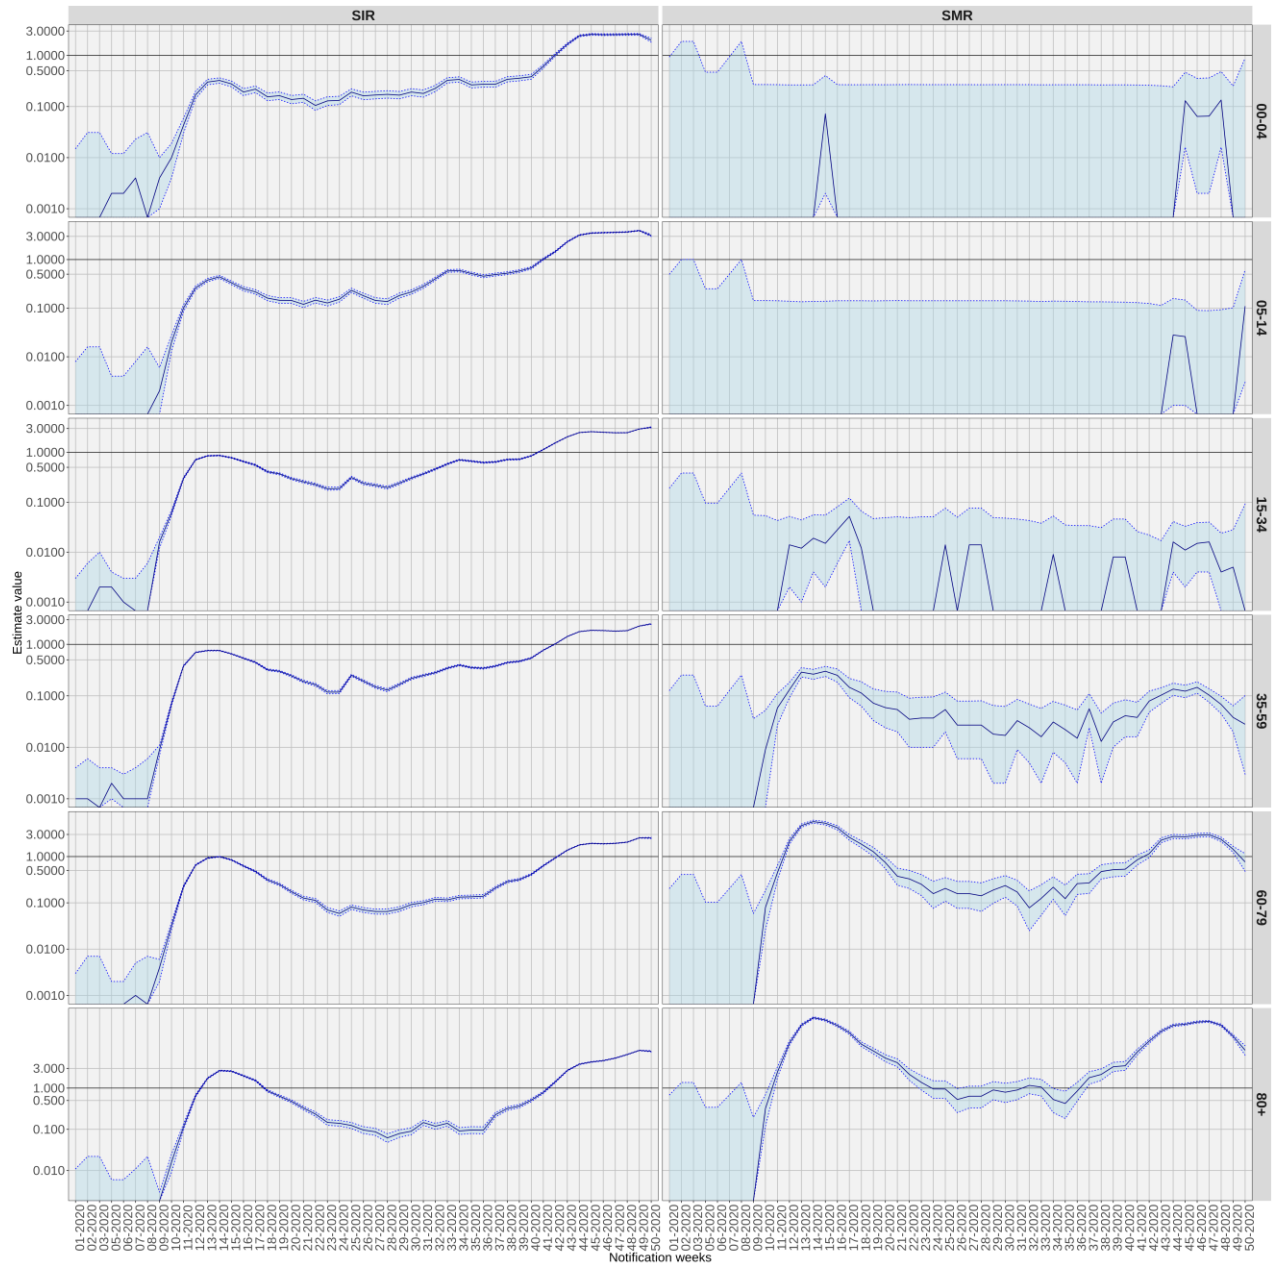

Supplement: mmc4.pdf [file mmc4.pdf]
