# Supplementary material
Source: PubMed Central journal article supplement (PMC8139365)
Supplement: mmc1.pdf [file mmc1.pdf]

## Model summaries

Table 1 shows the summaries of the intercept-only models with for different likelihood distributions: Poisson, zero-inflated Poisson (ZIP), negative binomial (NBIN) and zero-inflated negative binomial (ZNBIN). Assuming non-structural zeros (sample zeros), the zero-inflated models embed the probability of observing a zero  $i$ th district and  $t$ th notification day, given here as mean and variance for the model. The size of negative binomial observations (dispersion parameter) in  $i$ th district and  $t$ th notification day is given here as mean and variance. The Watanabe Akaike-information criterion (WAIC) gives the model fit: the smaller the WAIC, the better the model fit.

**Table 1: Intercept-only models**

| Model results                  | Poisson      | ZIP         | NBIN        | ZNBIN       |
|--------------------------------|--------------|-------------|-------------|-------------|
| intercept RR                   | 1            | 1.2611      | 0.8373      | 0,8385      |
| intercept lower 95%-CrI        | 0.9983       | 1.2589      | 0.829       | 0,8302      |
| intercept upper 95%-CrI        | 1.0018       | 1.2634      | 0.8457      | 0,8469      |
| WAIC                           | 1983795.7735 | 1591984.211 | 614614.7561 | 614616,9987 |
| Effective number of parameters | 735.6479     | 773.4593    | 1.5873      | 1,5887      |
| zero-probability mean          | -            | 0.4113      | -           | 0,0013      |
| zero-probability sd            | -            | 0.0014      | -           | 0,001       |
| nbinomial observations mean    | -            | -           | 0.3446      | 0,3453      |
| nbinomial observations sd      | -            | -           | 0.0018      | 0,0019      |

Table 2 shows the model summaries of the two spatiotemporal models fitted with a parametric temporal trend (Parametric trend) and a non-parametric dynamic temporal trend (Non-parametric trend), respectively. The results of the model with lowest WAIC is selected for further calculation.

**Table 2: Spatiotemporal models**

| <b>Variables</b>               | <b>Parametric trend</b> | <b>Non-parametric trend</b> |
|--------------------------------|-------------------------|-----------------------------|
| intercept RR                   | 0.1592                  | 0.2712                      |
| intercept lower 95%-CrI        | 1.0081                  | 0.2586                      |
| intercept upper 95%-CrI        | 0.1545                  | 0.2844                      |
| fixed time effect              | 1.008                   | -                           |
| fixed effect lower 95%-CrI     | 0.164                   | -                           |
| fixed effect upper 95%-CrI     | 1.0081                  | -                           |
| WAIC                           | 573683.3188             | 495398.318                  |
| Effective number of parameters | 709.0284                | 981.3817                    |
| zero-probability mean          | 17.4197                 | 24.0108                     |
| zero-probability sd            | 5.4559                  | 4.5991                      |
| nbinomial observations mean    | 0.6098                  | 2.0115                      |
| nbinomial observations sd      | 0.0038                  | 0.0167                      |
| Spatial iid mean               | 4.0608                  | 11.9478                     |
| Spatial iid sd                 | 165173.3388             | 9.4904                      |
| Spatial iCAR mean              | -                       | 2.4091                      |
| Spatial iCAR sd                | 0.7447                  | 0.9519                      |
| Space-time (parametric) mean   | 15912.5508              | -                           |
| Space-time (parametric) sd     | -                       | -                           |
| Temporal rw2 mean              | -                       | 0.0956                      |
| Temporal rw2 sd                | -                       | -                           |
| Temporal iid mean              | -                       | 0.0318                      |
| Temporal iid sd                | -                       | -                           |
