# Supplementary material
Source: PubMed Central journal article supplement (PMC8139365)
Supplement: mmc2.pdf [file mmc2.pdf]

## Descriptive summary

Table 1 shows the descriptive summary of SARS-CoV-2 incidences by age group and sex (data: 02/01/2020 to 08/12/2020).

**Table 1: SARS-CoV-2 incident cases by age group and sex**

| Age            | Female | Male   | Unkown | Total   |
|----------------|--------|--------|--------|---------|
| <b>0-4</b>     | 10900  | 11805  | 318    | 23023   |
| <b>5-14</b>    | 36122  | 39406  | 860    | 76388   |
| <b>15-34</b>   | 187948 | 193375 | 3101   | 384424  |
| <b>35-59</b>   | 238970 | 224394 | 3056   | 466420  |
| <b>60-79</b>   | 84995  | 85798  | 719    | 171512  |
| <b>80+</b>     | 61223  | 31916  | 241    | 93380   |
| <b>unknown</b> | 1085   | 1203   | 1089   | 3377    |
| <b>Total</b>   | 621243 | 587897 | 9384   | 1218524 |

Table 2 shows the descriptive summary of SARS-CoV-2 associated deaths by age group and sex (data: 02/01/2020 to 08/12/2020).

**Table 2: SARS-CoV-2 associated deaths by age group and sex**

| Age            | Female | Male  | Unkown | Total |
|----------------|--------|-------|--------|-------|
| <b>0-4</b>     | 5      | 2     | 0      | 7     |
| <b>5-14</b>    | 2      | 1     | 0      | 3     |
| <b>15-34</b>   | 14     | 27    | 0      | 41    |
| <b>35-59</b>   | 233    | 567   | 1      | 801   |
| <b>60-79</b>   | 1899   | 3917  | 11     | 5827  |
| <b>80+</b>     | 7037   | 6196  | 14     | 13247 |
| <b>unknown</b> | 5      | 0     | 1      | 6     |
| <b>Total</b>   | 9195   | 10710 | 27     | 19932 |
