# Supplementary material
Source: PubMed Central journal article supplement (PMC8139365)

# Standardised incidence (SIR) and mortality ratios (SMR) on district level by notification week

Figures 1 to 2 show the SIR and SMR mapped on district level by notification week.

**Figure S1: Standardised incidence ratio by notification week**

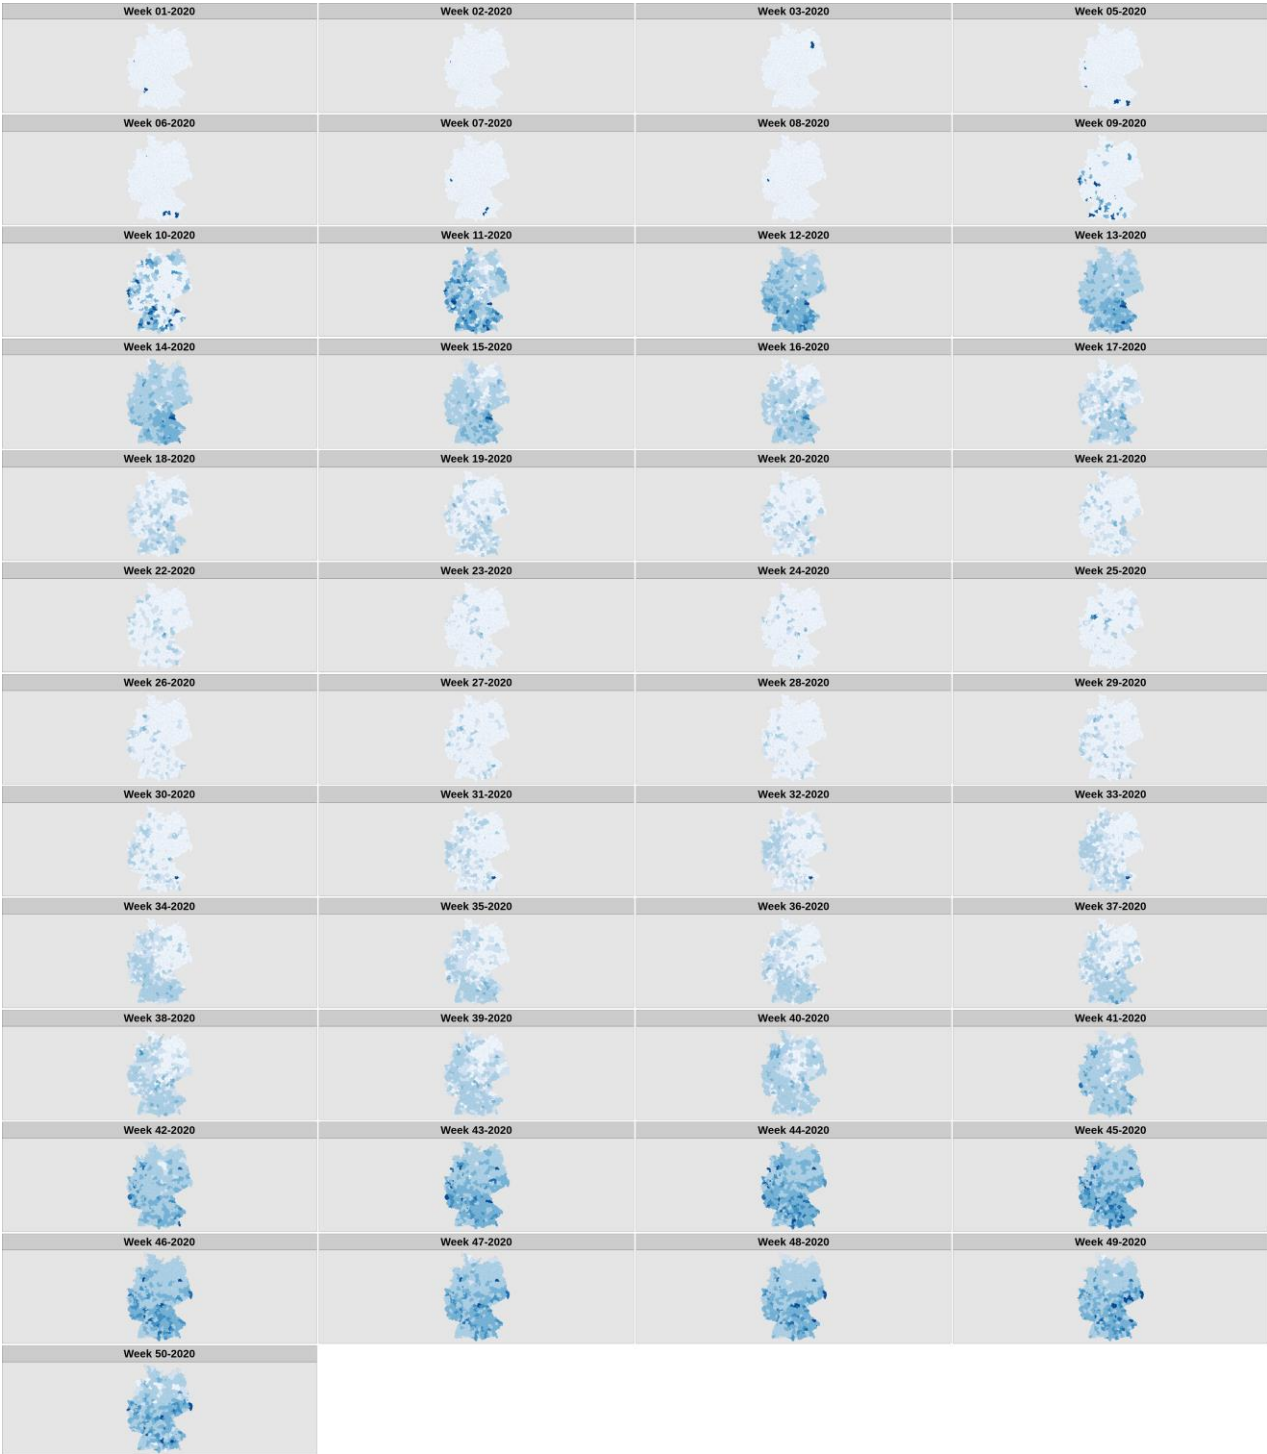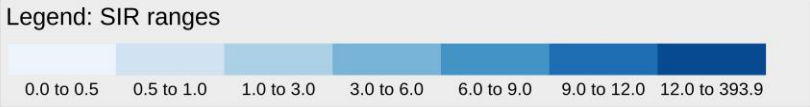

**Figure S2: Standardised mortality ratio by notification week**

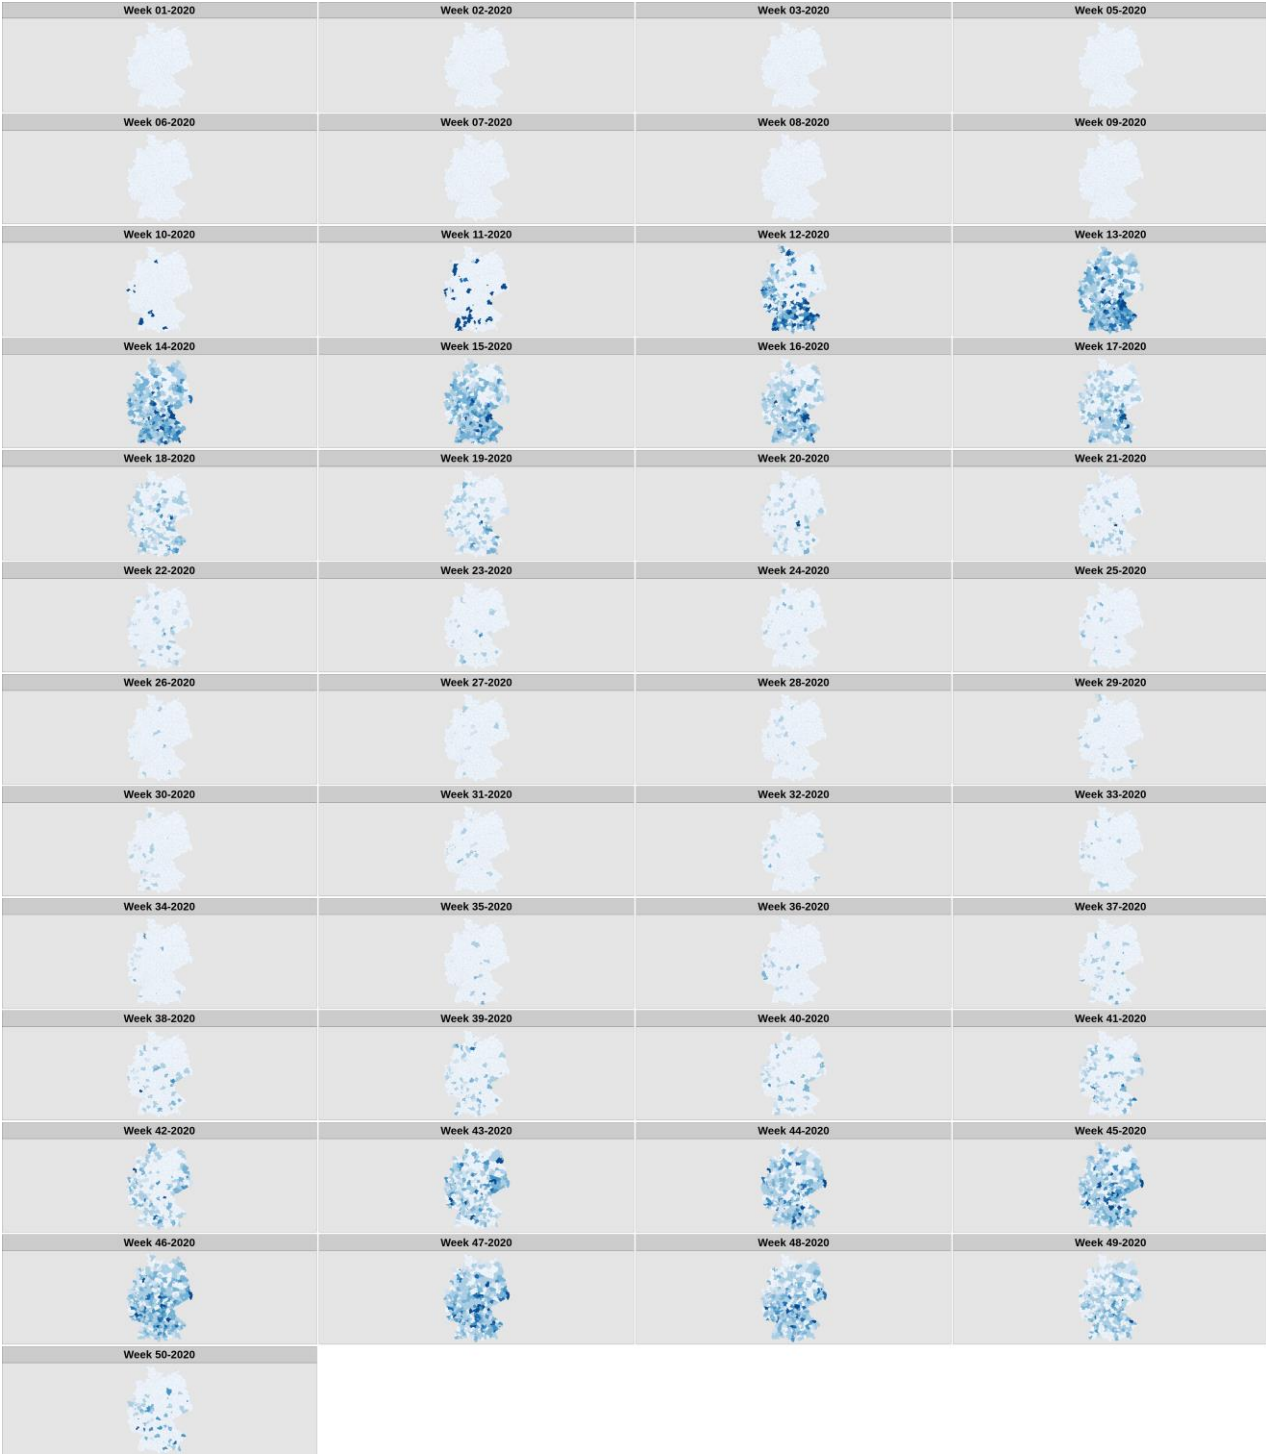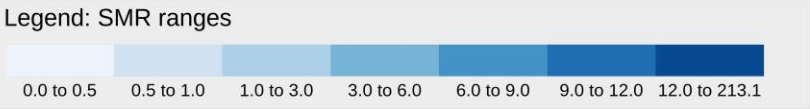

Supplement: mmc3.pdf [file mmc3.pdf]
