# Supplementary material
Source: PubMed Central journal article supplement (PMC8139365)
Supplement: mmc5.pdf [file mmc5.pdf]

## Standardised incidence (SIR) and mortality ratio (SMR)

Table 1 shows the SIR and corresponding 95% confidence intervals (95%-CI) for German federal states by notification week.

**Table 1: Standardised incidence ratio (SIR) of federal states by notification week**

| Notification week | Federal states         | SIR   | 95%-CI: lower limit | 95%-CI: upper limit |
|-------------------|------------------------|-------|---------------------|---------------------|
| 01-2020           | Brandenburg            | 0     | 0                   | 0,024               |
| 01-2020           | Berlin                 | 0     | 0                   | 0,017               |
| 01-2020           | Baden-Wuerttemberg     | 0,001 | 0                   | 0,008               |
| 01-2020           | Bayern                 | 0     | 0                   | 0,005               |
| 01-2020           | Bremen                 | 0     | 0                   | 0,088               |
| 01-2020           | Hessen                 | 0     | 0                   | 0,01                |
| 01-2020           | Hamburg                | 0     | 0                   | 0,033               |
| 01-2020           | Mecklenburg-Vorpommern | 0     | 0                   | 0,037               |
| 01-2020           | Niedersachsen          | 0     | 0                   | 0,008               |
| 01-2020           | Nordrhein-Westfalen    | 0,001 | 0                   | 0,005               |
| 01-2020           | Rheinland-Pfalz        | 0     | 0                   | 0,015               |
| 01-2020           | Schleswig-Holstein     | 0     | 0                   | 0,021               |
| 01-2020           | Saarland               | 0     | 0                   | 0,061               |
| 01-2020           | Sachsen                | 0     | 0                   | 0,015               |
| 01-2020           | Sachsen-Anhalt         | 0     | 0                   | 0,027               |
| 01-2020           | Thuringen              | 0     | 0                   | 0,028               |
| 02-2020           | Brandenburg            | 0     | 0                   | 0,048               |
| 02-2020           | Berlin                 | 0     | 0                   | 0,033               |
| 02-2020           | Baden-Wuerttemberg     | 0     | 0                   | 0,011               |
| 02-2020           | Bayern                 | 0     | 0                   | 0,009               |
| 02-2020           | Bremen                 | 0     | 0                   | 0,177               |
| 02-2020           | Hessen                 | 0     | 0                   | 0,019               |
| 02-2020           | Hamburg                | 0     | 0                   | 0,066               |
| 02-2020           | Mecklenburg-Vorpommern | 0     | 0                   | 0,075               |
| 02-2020           | Niedersachsen          | 0     | 0                   | 0,015               |
| 02-2020           | Nordrhein-Westfalen    | 0,002 | 0                   | 0,01                |
| 02-2020           | Rheinland-Pfalz        | 0     | 0                   | 0,03                |
| 02-2020           | Schleswig-Holstein     | 0     | 0                   | 0,042               |
| 02-2020           | Saarland               | 0     | 0                   | 0,122               |
| 02-2020           | Sachsen                | 0     | 0                   | 0,03                |
| 02-2020           | Sachsen-Anhalt         | 0     | 0                   | 0,055               |
| 02-2020           | Thuringen              | 0     | 0                   | 0,056               |
| 03-2020           | Brandenburg            | 0,013 | 0                   | 0,073               |
| 03-2020           | Berlin                 | 0     | 0                   | 0,033               |
| 03-2020           | Baden-Wuerttemberg     | 0     | 0                   | 0,011               |
| 03-2020           | Bayern                 | 0     | 0                   | 0,009               |
| 03-2020           | Bremen                 | 0     | 0                   | 0,177               |
| 03-2020           | Hessen                 | 0     | 0                   | 0,019               |
| 03-2020           | Hamburg                | 0     | 0                   | 0,066               |
| 03-2020           | Mecklenburg-Vorpommern | 0     | 0                   | 0,075               |

|         |                        |       |       |       |
|---------|------------------------|-------|-------|-------|
| 03-2020 | Niedersachsen          | 0     | 0     | 0,015 |
| 03-2020 | Nordrhein-Westfalen    | 0     | 0     | 0,007 |
| 03-2020 | Rheinland-Pfalz        | 0     | 0     | 0,03  |
| 03-2020 | Schleswig-Holstein     | 0     | 0     | 0,042 |
| 03-2020 | Saarland               | 0     | 0     | 0,122 |
| 03-2020 | Sachsen                | 0     | 0     | 0,03  |
| 03-2020 | Sachsen-Anhalt         | 0     | 0     | 0,055 |
| 03-2020 | Thueringen             | 0     | 0     | 0,056 |
| 05-2020 | Brandenburg            | 0     | 0     | 0,012 |
| 05-2020 | Berlin                 | 0     | 0     | 0,008 |
| 05-2020 | Baden-Wuerttemberg     | 0     | 0     | 0,003 |
| 05-2020 | Bayern                 | 0,006 | 0,003 | 0,011 |
| 05-2020 | Bremen                 | 0     | 0     | 0,044 |
| 05-2020 | Hessen                 | 0     | 0     | 0,005 |
| 05-2020 | Hamburg                | 0     | 0     | 0,016 |
| 05-2020 | Mecklenburg-Vorpommern | 0     | 0     | 0,019 |
| 05-2020 | Niedersachsen          | 0     | 0     | 0,004 |
| 05-2020 | Nordrhein-Westfalen    | 0,001 | 0     | 0,003 |
| 05-2020 | Rheinland-Pfalz        | 0     | 0     | 0,007 |
| 05-2020 | Schleswig-Holstein     | 0     | 0     | 0,01  |
| 05-2020 | Saarland               | 0,008 | 0     | 0,046 |
| 05-2020 | Sachsen                | 0     | 0     | 0,007 |
| 05-2020 | Sachsen-Anhalt         | 0     | 0     | 0,014 |
| 05-2020 | Thueringen             | 0     | 0     | 0,014 |
| 06-2020 | Brandenburg            | 0     | 0     | 0,012 |
| 06-2020 | Berlin                 | 0     | 0     | 0,008 |
| 06-2020 | Baden-Wuerttemberg     | 0     | 0     | 0,003 |
| 06-2020 | Bayern                 | 0,004 | 0,001 | 0,008 |
| 06-2020 | Bremen                 | 0     | 0     | 0,044 |
| 06-2020 | Hessen                 | 0     | 0     | 0,005 |
| 06-2020 | Hamburg                | 0     | 0     | 0,016 |
| 06-2020 | Mecklenburg-Vorpommern | 0     | 0     | 0,019 |
| 06-2020 | Niedersachsen          | 0,001 | 0     | 0,006 |
| 06-2020 | Nordrhein-Westfalen    | 0     | 0     | 0,002 |
| 06-2020 | Rheinland-Pfalz        | 0     | 0     | 0,007 |
| 06-2020 | Schleswig-Holstein     | 0     | 0     | 0,01  |
| 06-2020 | Saarland               | 0     | 0     | 0,03  |
| 06-2020 | Sachsen                | 0     | 0     | 0,007 |
| 06-2020 | Sachsen-Anhalt         | 0     | 0     | 0,014 |
| 06-2020 | Thueringen             | 0     | 0     | 0,014 |
| 07-2020 | Brandenburg            | 0     | 0     | 0,024 |
| 07-2020 | Berlin                 | 0     | 0     | 0,017 |
| 07-2020 | Baden-Wuerttemberg     | 0     | 0     | 0,005 |
| 07-2020 | Bayern                 | 0,004 | 0,001 | 0,011 |
| 07-2020 | Bremen                 | 0     | 0     | 0,088 |
| 07-2020 | Hessen                 | 0     | 0     | 0,01  |

|         |                        |       |       |       |
|---------|------------------------|-------|-------|-------|
| 07-2020 | Hamburg                | 0     | 0     | 0,033 |
| 07-2020 | Mecklenburg-Vorpommern | 0     | 0     | 0,037 |
| 07-2020 | Niedersachsen          | 0     | 0     | 0,008 |
| 07-2020 | Nordrhein-Westfalen    | 0,001 | 0     | 0,005 |
| 07-2020 | Rheinland-Pfalz        | 0     | 0     | 0,015 |
| 07-2020 | Schleswig-Holstein     | 0     | 0     | 0,021 |
| 07-2020 | Saarland               | 0     | 0     | 0,061 |
| 07-2020 | Sachsen                | 0     | 0     | 0,015 |
| 07-2020 | Sachsen-Anhalt         | 0     | 0     | 0,027 |
| 07-2020 | Thüringen              | 0     | 0     | 0,028 |
| 08-2020 | Brandenburg            | 0     | 0     | 0,048 |
| 08-2020 | Berlin                 | 0     | 0     | 0,033 |
| 08-2020 | Baden-Wuerttemberg     | 0     | 0     | 0,011 |
| 08-2020 | Bayern                 | 0     | 0     | 0,009 |
| 08-2020 | Bremen                 | 0     | 0     | 0,177 |
| 08-2020 | Hessen                 | 0     | 0     | 0,019 |
| 08-2020 | Hamburg                | 0     | 0     | 0,066 |
| 08-2020 | Mecklenburg-Vorpommern | 0     | 0     | 0,075 |
| 08-2020 | Niedersachsen          | 0     | 0     | 0,015 |
| 08-2020 | Nordrhein-Westfalen    | 0,002 | 0     | 0,01  |
| 08-2020 | Rheinland-Pfalz        | 0     | 0     | 0,03  |
| 08-2020 | Schleswig-Holstein     | 0     | 0     | 0,042 |
| 08-2020 | Saarland               | 0     | 0     | 0,122 |
| 08-2020 | Sachsen                | 0     | 0     | 0,03  |
| 08-2020 | Sachsen-Anhalt         | 0     | 0     | 0,055 |
| 08-2020 | Thüringen              | 0     | 0     | 0,056 |
| 09-2020 | Brandenburg            | 0,002 | 0     | 0,01  |
| 09-2020 | Berlin                 | 0     | 0     | 0,005 |
| 09-2020 | Baden-Wuerttemberg     | 0,008 | 0,005 | 0,013 |
| 09-2020 | Bayern                 | 0,003 | 0,001 | 0,006 |
| 09-2020 | Bremen                 | 0,007 | 0     | 0,038 |
| 09-2020 | Hessen                 | 0,004 | 0,001 | 0,009 |
| 09-2020 | Hamburg                | 0,005 | 0,001 | 0,018 |
| 09-2020 | Mecklenburg-Vorpommern | 0     | 0     | 0,011 |
| 09-2020 | Niedersachsen          | 0,001 | 0     | 0,003 |
| 09-2020 | Nordrhein-Westfalen    | 0,024 | 0,02  | 0,03  |
| 09-2020 | Rheinland-Pfalz        | 0,002 | 0     | 0,008 |
| 09-2020 | Schleswig-Holstein     | 0,003 | 0     | 0,012 |
| 09-2020 | Saarland               | 0,005 | 0     | 0,026 |
| 09-2020 | Sachsen                | 0     | 0     | 0,004 |
| 09-2020 | Sachsen-Anhalt         | 0     | 0     | 0,008 |
| 09-2020 | Thüringen              | 0     | 0     | 0,008 |
| 10-2020 | Brandenburg            | 0,011 | 0,004 | 0,024 |
| 10-2020 | Berlin                 | 0,047 | 0,033 | 0,065 |
| 10-2020 | Baden-Wuerttemberg     | 0,087 | 0,075 | 0,099 |
| 10-2020 | Bayern                 | 0,046 | 0,039 | 0,055 |

|         |                        |       |       |       |
|---------|------------------------|-------|-------|-------|
| 10-2020 | Bremen                 | 0,021 | 0,004 | 0,06  |
| 10-2020 | Hessen                 | 0,016 | 0,01  | 0,024 |
| 10-2020 | Hamburg                | 0,049 | 0,03  | 0,075 |
| 10-2020 | Mecklenburg-Vorpommern | 0,02  | 0,008 | 0,042 |
| 10-2020 | Niedersachsen          | 0,022 | 0,015 | 0,03  |
| 10-2020 | Nordrhein-Westfalen    | 0,095 | 0,085 | 0,105 |
| 10-2020 | Rheinland-Pfalz        | 0,015 | 0,008 | 0,025 |
| 10-2020 | Schleswig-Holstein     | 0,011 | 0,005 | 0,023 |
| 10-2020 | Saarland               | 0,005 | 0     | 0,026 |
| 10-2020 | Sachsen                | 0,011 | 0,005 | 0,021 |
| 10-2020 | Sachsen-Anhalt         | 0     | 0     | 0,008 |
| 10-2020 | Thüringen              | 0,004 | 0,001 | 0,016 |
| 11-2020 | Brandenburg            | 0,187 | 0,152 | 0,227 |
| 11-2020 | Berlin                 | 0,332 | 0,293 | 0,375 |
| 11-2020 | Baden-Wuerttemberg     | 0,417 | 0,395 | 0,44  |
| 11-2020 | Bayern                 | 0,333 | 0,314 | 0,353 |
| 11-2020 | Bremen                 | 0,276 | 0,205 | 0,363 |
| 11-2020 | Hessen                 | 0,198 | 0,176 | 0,222 |
| 11-2020 | Hamburg                | 0,182 | 0,163 | 0,203 |
| 11-2020 | Mecklenburg-Vorpommern | 0,094 | 0,065 | 0,133 |
| 11-2020 | Niedersachsen          | 0,211 | 0,192 | 0,233 |
| 11-2020 | Nordrhein-Westfalen    | 0,335 | 0,319 | 0,351 |
| 11-2020 | Rheinland-Pfalz        | 0,353 | 0,315 | 0,393 |
| 11-2020 | Schleswig-Holstein     | 0,183 | 0,152 | 0,219 |
| 11-2020 | Saarland               | 0,335 | 0,264 | 0,42  |
| 11-2020 | Sachsen                | 0,178 | 0,152 | 0,207 |
| 11-2020 | Sachsen-Anhalt         | 0,101 | 0,074 | 0,134 |
| 11-2020 | Thüringen              | 0,108 | 0,08  | 0,142 |
| 12-2020 | Brandenburg            | 0,477 | 0,424 | 0,535 |
| 12-2020 | Berlin                 | 1,088 | 1,016 | 1,163 |
| 12-2020 | Baden-Wuerttemberg     | 0,813 | 0,789 | 0,837 |
| 12-2020 | Bayern                 | 0,851 | 0,827 | 0,875 |
| 12-2020 | Bremen                 | 0,405 | 0,333 | 0,486 |
| 12-2020 | Hessen                 | 0,545 | 0,514 | 0,578 |
| 12-2020 | Hamburg                | 0,3   | 0,281 | 0,319 |
| 12-2020 | Mecklenburg-Vorpommern | 0,396 | 0,335 | 0,465 |
| 12-2020 | Niedersachsen          | 0,551 | 0,522 | 0,58  |
| 12-2020 | Nordrhein-Westfalen    | 0,61  | 0,594 | 0,626 |
| 12-2020 | Rheinland-Pfalz        | 0,996 | 0,936 | 1,059 |
| 12-2020 | Schleswig-Holstein     | 0,471 | 0,423 | 0,524 |
| 12-2020 | Saarland               | 0,889 | 0,784 | 1,005 |
| 12-2020 | Sachsen                | 0,534 | 0,496 | 0,574 |
| 12-2020 | Sachsen-Anhalt         | 0,434 | 0,38  | 0,494 |
| 12-2020 | Thüringen              | 0,564 | 0,5   | 0,634 |
| 13-2020 | Brandenburg            | 0,657 | 0,597 | 0,723 |
| 13-2020 | Berlin                 | 1,767 | 1,675 | 1,863 |

|         |                        |       |       |       |
|---------|------------------------|-------|-------|-------|
| 13-2020 | Baden-Wuerttemberg     | 0,964 | 0,942 | 0,986 |
| 13-2020 | Bayern                 | 1,204 | 1,179 | 1,229 |
| 13-2020 | Bremen                 | 0,397 | 0,329 | 0,475 |
| 13-2020 | Hessen                 | 0,669 | 0,637 | 0,701 |
| 13-2020 | Hamburg                | 0,291 | 0,274 | 0,309 |
| 13-2020 | Mecklenburg-Vorpommern | 0,463 | 0,397 | 0,538 |
| 13-2020 | Niedersachsen          | 0,686 | 0,657 | 0,715 |
| 13-2020 | Nordrhein-Westfalen    | 0,631 | 0,615 | 0,646 |
| 13-2020 | Rheinland-Pfalz        | 1,217 | 1,153 | 1,283 |
| 13-2020 | Schleswig-Holstein     | 0,716 | 0,66  | 0,774 |
| 13-2020 | Saarland               | 1,076 | 0,976 | 1,185 |
| 13-2020 | Sachsen                | 0,643 | 0,605 | 0,683 |
| 13-2020 | Sachsen-Anhalt         | 0,681 | 0,614 | 0,753 |
| 13-2020 | Thueringen             | 0,843 | 0,766 | 0,925 |
| 14-2020 | Brandenburg            | 0,86  | 0,793 | 0,931 |
| 14-2020 | Berlin                 | 1,577 | 1,49  | 1,668 |
| 14-2020 | Baden-Wuerttemberg     | 1,055 | 1,032 | 1,08  |
| 14-2020 | Bayern                 | 1,304 | 1,28  | 1,329 |
| 14-2020 | Bremen                 | 0,375 | 0,306 | 0,455 |
| 14-2020 | Hessen                 | 0,667 | 0,634 | 0,7   |
| 14-2020 | Hamburg                | 0,272 | 0,255 | 0,291 |
| 14-2020 | Mecklenburg-Vorpommern | 0,438 | 0,373 | 0,51  |
| 14-2020 | Niedersachsen          | 0,73  | 0,7   | 0,762 |
| 14-2020 | Nordrhein-Westfalen    | 0,676 | 0,66  | 0,693 |
| 14-2020 | Rheinland-Pfalz        | 1,128 | 1,067 | 1,193 |
| 14-2020 | Schleswig-Holstein     | 0,704 | 0,649 | 0,762 |
| 14-2020 | Saarland               | 1,466 | 1,365 | 1,573 |
| 14-2020 | Sachsen                | 0,739 | 0,698 | 0,783 |
| 14-2020 | Sachsen-Anhalt         | 0,638 | 0,571 | 0,712 |
| 14-2020 | Thueringen             | 0,839 | 0,76  | 0,923 |
| 15-2020 | Brandenburg            | 0,845 | 0,778 | 0,917 |
| 15-2020 | Berlin                 | 1,184 | 1,109 | 1,263 |
| 15-2020 | Baden-Wuerttemberg     | 1,026 | 0,999 | 1,054 |
| 15-2020 | Bayern                 | 1,081 | 1,057 | 1,106 |
| 15-2020 | Bremen                 | 0,404 | 0,325 | 0,496 |
| 15-2020 | Hessen                 | 0,627 | 0,594 | 0,66  |
| 15-2020 | Hamburg                | 0,266 | 0,247 | 0,285 |
| 15-2020 | Mecklenburg-Vorpommern | 0,257 | 0,207 | 0,316 |
| 15-2020 | Niedersachsen          | 0,609 | 0,581 | 0,638 |
| 15-2020 | Nordrhein-Westfalen    | 0,677 | 0,659 | 0,695 |
| 15-2020 | Rheinland-Pfalz        | 0,885 | 0,829 | 0,944 |
| 15-2020 | Schleswig-Holstein     | 0,585 | 0,532 | 0,642 |
| 15-2020 | Saarland               | 1,525 | 1,402 | 1,655 |
| 15-2020 | Sachsen                | 0,647 | 0,602 | 0,694 |
| 15-2020 | Sachsen-Anhalt         | 0,45  | 0,393 | 0,513 |
| 15-2020 | Thueringen             | 0,645 | 0,576 | 0,72  |

|         |                        |       |       |       |
|---------|------------------------|-------|-------|-------|
| 16-2020 | Brandenburg            | 0,63  | 0,569 | 0,696 |
| 16-2020 | Berlin                 | 0,737 | 0,678 | 0,8   |
| 16-2020 | Baden-Wuerttemberg     | 0,843 | 0,814 | 0,872 |
| 16-2020 | Bayern                 | 0,902 | 0,876 | 0,928 |
| 16-2020 | Bremen                 | 0,53  | 0,438 | 0,637 |
| 16-2020 | Hessen                 | 0,538 | 0,506 | 0,571 |
| 16-2020 | Hamburg                | 0,239 | 0,217 | 0,262 |
| 16-2020 | Mecklenburg-Vorpommern | 0,107 | 0,075 | 0,147 |
| 16-2020 | Niedersachsen          | 0,475 | 0,448 | 0,504 |
| 16-2020 | Nordrhein-Westfalen    | 0,583 | 0,565 | 0,603 |
| 16-2020 | Rheinland-Pfalz        | 0,669 | 0,618 | 0,722 |
| 16-2020 | Schleswig-Holstein     | 0,411 | 0,364 | 0,461 |
| 16-2020 | Saarland               | 0,774 | 0,674 | 0,885 |
| 16-2020 | Sachsen                | 0,385 | 0,348 | 0,426 |
| 16-2020 | Sachsen-Anhalt         | 0,369 | 0,317 | 0,427 |
| 16-2020 | Thueringen             | 0,587 | 0,521 | 0,66  |
| 17-2020 | Brandenburg            | 0,552 | 0,494 | 0,614 |
| 17-2020 | Berlin                 | 0,562 | 0,51  | 0,617 |
| 17-2020 | Baden-Wuerttemberg     | 0,727 | 0,698 | 0,757 |
| 17-2020 | Bayern                 | 0,731 | 0,705 | 0,757 |
| 17-2020 | Bremen                 | 0,836 | 0,723 | 0,962 |
| 17-2020 | Hessen                 | 0,441 | 0,411 | 0,474 |
| 17-2020 | Hamburg                | 0,227 | 0,202 | 0,255 |
| 17-2020 | Mecklenburg-Vorpommern | 0,061 | 0,038 | 0,093 |
| 17-2020 | Niedersachsen          | 0,372 | 0,347 | 0,398 |
| 17-2020 | Nordrhein-Westfalen    | 0,465 | 0,447 | 0,484 |
| 17-2020 | Rheinland-Pfalz        | 0,397 | 0,357 | 0,44  |
| 17-2020 | Schleswig-Holstein     | 0,312 | 0,271 | 0,359 |
| 17-2020 | Saarland               | 0,696 | 0,595 | 0,808 |
| 17-2020 | Sachsen                | 0,273 | 0,24  | 0,308 |
| 17-2020 | Sachsen-Anhalt         | 0,277 | 0,232 | 0,328 |
| 17-2020 | Thueringen             | 0,661 | 0,592 | 0,737 |
| 18-2020 | Brandenburg            | 0,402 | 0,352 | 0,457 |
| 18-2020 | Berlin                 | 0,446 | 0,401 | 0,496 |
| 18-2020 | Baden-Wuerttemberg     | 0,445 | 0,42  | 0,471 |
| 18-2020 | Bayern                 | 0,466 | 0,444 | 0,488 |
| 18-2020 | Bremen                 | 0,672 | 0,567 | 0,789 |
| 18-2020 | Hessen                 | 0,359 | 0,33  | 0,389 |
| 18-2020 | Hamburg                | 0,175 | 0,147 | 0,207 |
| 18-2020 | Mecklenburg-Vorpommern | 0,081 | 0,054 | 0,117 |
| 18-2020 | Niedersachsen          | 0,216 | 0,196 | 0,237 |
| 18-2020 | Nordrhein-Westfalen    | 0,346 | 0,329 | 0,363 |
| 18-2020 | Rheinland-Pfalz        | 0,268 | 0,235 | 0,304 |
| 18-2020 | Schleswig-Holstein     | 0,225 | 0,189 | 0,265 |
| 18-2020 | Saarland               | 0,384 | 0,307 | 0,475 |
| 18-2020 | Sachsen                | 0,199 | 0,171 | 0,23  |

|         |                        |       |       |       |
|---------|------------------------|-------|-------|-------|
| 18-2020 | Sachsen-Anhalt         | 0,141 | 0,11  | 0,18  |
| 18-2020 | Thueringen             | 0,51  | 0,448 | 0,577 |
| 19-2020 | Brandenburg            | 0,228 | 0,19  | 0,271 |
| 19-2020 | Berlin                 | 0,321 | 0,282 | 0,363 |
| 19-2020 | Baden-Wuerttemberg     | 0,344 | 0,322 | 0,367 |
| 19-2020 | Bayern                 | 0,378 | 0,357 | 0,399 |
| 19-2020 | Bremen                 | 0,564 | 0,481 | 0,657 |
| 19-2020 | Hessen                 | 0,301 | 0,274 | 0,33  |
| 19-2020 | Hamburg                | 0,149 | 0,121 | 0,183 |
| 19-2020 | Mecklenburg-Vorpommern | 0,078 | 0,051 | 0,114 |
| 19-2020 | Niedersachsen          | 0,232 | 0,211 | 0,254 |
| 19-2020 | Nordrhein-Westfalen    | 0,35  | 0,332 | 0,367 |
| 19-2020 | Rheinland-Pfalz        | 0,218 | 0,188 | 0,25  |
| 19-2020 | Schleswig-Holstein     | 0,264 | 0,226 | 0,306 |
| 19-2020 | Saarland               | 0,189 | 0,135 | 0,257 |
| 19-2020 | Sachsen                | 0,23  | 0,201 | 0,263 |
| 19-2020 | Sachsen-Anhalt         | 0,126 | 0,096 | 0,162 |
| 19-2020 | Thueringen             | 0,485 | 0,424 | 0,552 |
| 20-2020 | Brandenburg            | 0,114 | 0,088 | 0,147 |
| 20-2020 | Berlin                 | 0,253 | 0,219 | 0,29  |
| 20-2020 | Baden-Wuerttemberg     | 0,243 | 0,224 | 0,263 |
| 20-2020 | Bayern                 | 0,327 | 0,308 | 0,347 |
| 20-2020 | Bremen                 | 0,436 | 0,363 | 0,52  |
| 20-2020 | Hessen                 | 0,27  | 0,245 | 0,298 |
| 20-2020 | Hamburg                | 0,091 | 0,068 | 0,121 |
| 20-2020 | Mecklenburg-Vorpommern | 0,058 | 0,035 | 0,09  |
| 20-2020 | Niedersachsen          | 0,16  | 0,142 | 0,179 |
| 20-2020 | Nordrhein-Westfalen    | 0,304 | 0,288 | 0,321 |
| 20-2020 | Rheinland-Pfalz        | 0,194 | 0,166 | 0,225 |
| 20-2020 | Schleswig-Holstein     | 0,077 | 0,057 | 0,102 |
| 20-2020 | Saarland               | 0,151 | 0,103 | 0,213 |
| 20-2020 | Sachsen                | 0,174 | 0,148 | 0,203 |
| 20-2020 | Sachsen-Anhalt         | 0,072 | 0,05  | 0,1   |
| 20-2020 | Thueringen             | 0,33  | 0,28  | 0,387 |
| 21-2020 | Brandenburg            | 0,068 | 0,048 | 0,094 |
| 21-2020 | Berlin                 | 0,236 | 0,203 | 0,273 |
| 21-2020 | Baden-Wuerttemberg     | 0,166 | 0,15  | 0,183 |
| 21-2020 | Bayern                 | 0,255 | 0,237 | 0,273 |
| 21-2020 | Bremen                 | 0,368 | 0,293 | 0,455 |
| 21-2020 | Hessen                 | 0,254 | 0,229 | 0,28  |
| 21-2020 | Hamburg                | 0,062 | 0,04  | 0,091 |
| 21-2020 | Mecklenburg-Vorpommern | 0,029 | 0,014 | 0,053 |
| 21-2020 | Niedersachsen          | 0,221 | 0,2   | 0,243 |
| 21-2020 | Nordrhein-Westfalen    | 0,217 | 0,203 | 0,232 |
| 21-2020 | Rheinland-Pfalz        | 0,11  | 0,089 | 0,134 |
| 21-2020 | Schleswig-Holstein     | 0,102 | 0,079 | 0,13  |

|         |                        |       |       |       |
|---------|------------------------|-------|-------|-------|
| 21-2020 | Saarland               | 0,099 | 0,061 | 0,151 |
| 21-2020 | Sachsen                | 0,12  | 0,099 | 0,146 |
| 21-2020 | Sachsen-Anhalt         | 0,032 | 0,018 | 0,052 |
| 21-2020 | Thuringen              | 0,274 | 0,228 | 0,326 |
| 22-2020 | Brandenburg            | 0,061 | 0,042 | 0,086 |
| 22-2020 | Berlin                 | 0,245 | 0,211 | 0,282 |
| 22-2020 | Baden-Wuerttemberg     | 0,129 | 0,115 | 0,144 |
| 22-2020 | Bayern                 | 0,203 | 0,187 | 0,219 |
| 22-2020 | Bremen                 | 0,503 | 0,419 | 0,6   |
| 22-2020 | Hessen                 | 0,204 | 0,181 | 0,229 |
| 22-2020 | Hamburg                | 0,04  | 0,023 | 0,064 |
| 22-2020 | Mecklenburg-Vorpommern | 0,009 | 0,002 | 0,025 |
| 22-2020 | Niedersachsen          | 0,21  | 0,191 | 0,231 |
| 22-2020 | Nordrhein-Westfalen    | 0,186 | 0,173 | 0,2   |
| 22-2020 | Rheinland-Pfalz        | 0,124 | 0,102 | 0,15  |
| 22-2020 | Schleswig-Holstein     | 0,055 | 0,038 | 0,076 |
| 22-2020 | Saarland               | 0,113 | 0,073 | 0,169 |
| 22-2020 | Sachsen                | 0,079 | 0,062 | 0,1   |
| 22-2020 | Sachsen-Anhalt         | 0,028 | 0,015 | 0,047 |
| 22-2020 | Thuringen              | 0,325 | 0,275 | 0,381 |
| 23-2020 | Brandenburg            | 0,032 | 0,018 | 0,051 |
| 23-2020 | Berlin                 | 0,242 | 0,209 | 0,28  |
| 23-2020 | Baden-Wuerttemberg     | 0,076 | 0,065 | 0,088 |
| 23-2020 | Bayern                 | 0,108 | 0,096 | 0,12  |
| 23-2020 | Bremen                 | 0,533 | 0,434 | 0,65  |
| 23-2020 | Hessen                 | 0,104 | 0,088 | 0,123 |
| 23-2020 | Hamburg                | 0,061 | 0,04  | 0,089 |
| 23-2020 | Mecklenburg-Vorpommern | 0,038 | 0,02  | 0,065 |
| 23-2020 | Niedersachsen          | 0,253 | 0,232 | 0,276 |
| 23-2020 | Nordrhein-Westfalen    | 0,156 | 0,144 | 0,168 |
| 23-2020 | Rheinland-Pfalz        | 0,096 | 0,077 | 0,119 |
| 23-2020 | Schleswig-Holstein     | 0,018 | 0,009 | 0,032 |
| 23-2020 | Saarland               | 0,109 | 0,069 | 0,163 |
| 23-2020 | Sachsen                | 0,032 | 0,021 | 0,046 |
| 23-2020 | Sachsen-Anhalt         | 0,027 | 0,015 | 0,047 |
| 23-2020 | Thuringen              | 0,161 | 0,126 | 0,202 |
| 24-2020 | Brandenburg            | 0,06  | 0,041 | 0,084 |
| 24-2020 | Berlin                 | 0,433 | 0,388 | 0,482 |
| 24-2020 | Baden-Wuerttemberg     | 0,071 | 0,061 | 0,082 |
| 24-2020 | Bayern                 | 0,092 | 0,081 | 0,104 |
| 24-2020 | Bremen                 | 0,311 | 0,237 | 0,4   |
| 24-2020 | Hessen                 | 0,109 | 0,092 | 0,128 |
| 24-2020 | Hamburg                | 0,056 | 0,036 | 0,083 |
| 24-2020 | Mecklenburg-Vorpommern | 0,026 | 0,012 | 0,049 |
| 24-2020 | Niedersachsen          | 0,194 | 0,175 | 0,215 |
| 24-2020 | Nordrhein-Westfalen    | 0,169 | 0,157 | 0,183 |

|         |                        |       |       |       |
|---------|------------------------|-------|-------|-------|
| 24-2020 | Rheinland-Pfalz        | 0,062 | 0,046 | 0,08  |
| 24-2020 | Schleswig-Holstein     | 0,015 | 0,007 | 0,028 |
| 24-2020 | Saarland               | 0,109 | 0,069 | 0,163 |
| 24-2020 | Sachsen                | 0,022 | 0,013 | 0,034 |
| 24-2020 | Sachsen-Anhalt         | 0,105 | 0,078 | 0,138 |
| 24-2020 | Thueringen             | 0,184 | 0,147 | 0,228 |
| 25-2020 | Brandenburg            | 0,136 | 0,106 | 0,17  |
| 25-2020 | Berlin                 | 0,655 | 0,6   | 0,715 |
| 25-2020 | Baden-Wuerttemberg     | 0,078 | 0,067 | 0,09  |
| 25-2020 | Bayern                 | 0,091 | 0,08  | 0,103 |
| 25-2020 | Bremen                 | 0,32  | 0,241 | 0,417 |
| 25-2020 | Hessen                 | 0,17  | 0,149 | 0,194 |
| 25-2020 | Hamburg                | 0,069 | 0,047 | 0,097 |
| 25-2020 | Mecklenburg-Vorpommern | 0,029 | 0,014 | 0,053 |
| 25-2020 | Niedersachsen          | 0,198 | 0,179 | 0,22  |
| 25-2020 | Nordrhein-Westfalen    | 0,472 | 0,452 | 0,493 |
| 25-2020 | Rheinland-Pfalz        | 0,083 | 0,065 | 0,105 |
| 25-2020 | Schleswig-Holstein     | 0,027 | 0,016 | 0,044 |
| 25-2020 | Saarland               | 0,033 | 0,013 | 0,068 |
| 25-2020 | Sachsen                | 0,088 | 0,069 | 0,109 |
| 25-2020 | Sachsen-Anhalt         | 0,167 | 0,132 | 0,208 |
| 25-2020 | Thueringen             | 0,091 | 0,066 | 0,124 |
| 26-2020 | Brandenburg            | 0,073 | 0,052 | 0,099 |
| 26-2020 | Berlin                 | 0,404 | 0,361 | 0,451 |
| 26-2020 | Baden-Wuerttemberg     | 0,11  | 0,098 | 0,125 |
| 26-2020 | Bayern                 | 0,121 | 0,109 | 0,134 |
| 26-2020 | Bremen                 | 0,093 | 0,051 | 0,155 |
| 26-2020 | Hessen                 | 0,126 | 0,108 | 0,146 |
| 26-2020 | Hamburg                | 0,089 | 0,065 | 0,12  |
| 26-2020 | Mecklenburg-Vorpommern | 0,023 | 0,01  | 0,046 |
| 26-2020 | Niedersachsen          | 0,14  | 0,123 | 0,159 |
| 26-2020 | Nordrhein-Westfalen    | 0,352 | 0,335 | 0,37  |
| 26-2020 | Rheinland-Pfalz        | 0,086 | 0,067 | 0,107 |
| 26-2020 | Schleswig-Holstein     | 0,026 | 0,015 | 0,042 |
| 26-2020 | Saarland               | 0,033 | 0,013 | 0,068 |
| 26-2020 | Sachsen                | 0,024 | 0,015 | 0,037 |
| 26-2020 | Sachsen-Anhalt         | 0,047 | 0,029 | 0,071 |
| 26-2020 | Thueringen             | 0,041 | 0,025 | 0,065 |
| 27-2020 | Brandenburg            | 0,078 | 0,056 | 0,105 |
| 27-2020 | Berlin                 | 0,34  | 0,3   | 0,383 |
| 27-2020 | Baden-Wuerttemberg     | 0,087 | 0,075 | 0,099 |
| 27-2020 | Bayern                 | 0,147 | 0,134 | 0,161 |
| 27-2020 | Bremen                 | 0,119 | 0,071 | 0,188 |
| 27-2020 | Hessen                 | 0,136 | 0,117 | 0,157 |
| 27-2020 | Hamburg                | 0,05  | 0,031 | 0,076 |
| 27-2020 | Mecklenburg-Vorpommern | 0,009 | 0,002 | 0,025 |

|         |                        |       |       |       |
|---------|------------------------|-------|-------|-------|
| 27-2020 | Niedersachsen          | 0,105 | 0,09  | 0,121 |
| 27-2020 | Nordrhein-Westfalen    | 0,26  | 0,245 | 0,275 |
| 27-2020 | Rheinland-Pfalz        | 0,108 | 0,088 | 0,132 |
| 27-2020 | Schleswig-Holstein     | 0,059 | 0,042 | 0,082 |
| 27-2020 | Saarland               | 0,014 | 0,003 | 0,041 |
| 27-2020 | Sachsen                | 0,016 | 0,009 | 0,027 |
| 27-2020 | Sachsen-Anhalt         | 0,047 | 0,029 | 0,071 |
| 27-2020 | Thuringen              | 0,05  | 0,032 | 0,075 |
| 28-2020 | Brandenburg            | 0,037 | 0,023 | 0,057 |
| 28-2020 | Berlin                 | 0,242 | 0,209 | 0,28  |
| 28-2020 | Baden-Wuerttemberg     | 0,104 | 0,091 | 0,118 |
| 28-2020 | Bayern                 | 0,161 | 0,148 | 0,176 |
| 28-2020 | Bremen                 | 0,075 | 0,038 | 0,135 |
| 28-2020 | Hessen                 | 0,156 | 0,136 | 0,178 |
| 28-2020 | Hamburg                | 0,034 | 0,019 | 0,057 |
| 28-2020 | Mecklenburg-Vorpommern | 0     | 0     | 0,011 |
| 28-2020 | Niedersachsen          | 0,053 | 0,043 | 0,065 |
| 28-2020 | Nordrhein-Westfalen    | 0,218 | 0,204 | 0,232 |
| 28-2020 | Rheinland-Pfalz        | 0,113 | 0,092 | 0,137 |
| 28-2020 | Schleswig-Holstein     | 0,037 | 0,023 | 0,055 |
| 28-2020 | Saarland               | 0,061 | 0,033 | 0,105 |
| 28-2020 | Sachsen                | 0,019 | 0,011 | 0,031 |
| 28-2020 | Sachsen-Anhalt         | 0,053 | 0,034 | 0,078 |
| 28-2020 | Thuringen              | 0,048 | 0,03  | 0,073 |
| 29-2020 | Brandenburg            | 0,048 | 0,032 | 0,071 |
| 29-2020 | Berlin                 | 0,169 | 0,142 | 0,201 |
| 29-2020 | Baden-Wuerttemberg     | 0,154 | 0,139 | 0,17  |
| 29-2020 | Bayern                 | 0,173 | 0,159 | 0,189 |
| 29-2020 | Bremen                 | 0,201 | 0,135 | 0,286 |
| 29-2020 | Hessen                 | 0,169 | 0,148 | 0,192 |
| 29-2020 | Hamburg                | 0,04  | 0,023 | 0,064 |
| 29-2020 | Mecklenburg-Vorpommern | 0,017 | 0,006 | 0,038 |
| 29-2020 | Niedersachsen          | 0,137 | 0,12  | 0,156 |
| 29-2020 | Nordrhein-Westfalen    | 0,258 | 0,244 | 0,274 |
| 29-2020 | Rheinland-Pfalz        | 0,161 | 0,136 | 0,19  |
| 29-2020 | Schleswig-Holstein     | 0,081 | 0,06  | 0,106 |
| 29-2020 | Saarland               | 0,076 | 0,043 | 0,123 |
| 29-2020 | Sachsen                | 0,021 | 0,012 | 0,033 |
| 29-2020 | Sachsen-Anhalt         | 0,078 | 0,055 | 0,108 |
| 29-2020 | Thuringen              | 0,063 | 0,042 | 0,091 |
| 30-2020 | Brandenburg            | 0,113 | 0,086 | 0,145 |
| 30-2020 | Berlin                 | 0,282 | 0,246 | 0,322 |
| 30-2020 | Baden-Wuerttemberg     | 0,198 | 0,181 | 0,217 |
| 30-2020 | Bayern                 | 0,235 | 0,218 | 0,253 |
| 30-2020 | Bremen                 | 0,169 | 0,111 | 0,245 |
| 30-2020 | Hessen                 | 0,202 | 0,179 | 0,226 |

|         |                        |       |       |       |
|---------|------------------------|-------|-------|-------|
| 30-2020 | Hamburg                | 0,15  | 0,121 | 0,184 |
| 30-2020 | Mecklenburg-Vorpommern | 0,101 | 0,07  | 0,14  |
| 30-2020 | Niedersachsen          | 0,141 | 0,124 | 0,16  |
| 30-2020 | Nordrhein-Westfalen    | 0,318 | 0,302 | 0,335 |
| 30-2020 | Rheinland-Pfalz        | 0,12  | 0,098 | 0,145 |
| 30-2020 | Schleswig-Holstein     | 0,106 | 0,082 | 0,135 |
| 30-2020 | Saarland               | 0,113 | 0,073 | 0,169 |
| 30-2020 | Sachsen                | 0,033 | 0,022 | 0,047 |
| 30-2020 | Sachsen-Anhalt         | 0,076 | 0,053 | 0,105 |
| 30-2020 | Thuringen              | 0,054 | 0,035 | 0,08  |
| 31-2020 | Brandenburg            | 0,06  | 0,041 | 0,084 |
| 31-2020 | Berlin                 | 0,427 | 0,382 | 0,475 |
| 31-2020 | Baden-Wuerttemberg     | 0,199 | 0,182 | 0,217 |
| 31-2020 | Bayern                 | 0,223 | 0,207 | 0,241 |
| 31-2020 | Bremen                 | 0,214 | 0,149 | 0,298 |
| 31-2020 | Hessen                 | 0,305 | 0,277 | 0,335 |
| 31-2020 | Hamburg                | 0,138 | 0,114 | 0,165 |
| 31-2020 | Mecklenburg-Vorpommern | 0,114 | 0,082 | 0,155 |
| 31-2020 | Niedersachsen          | 0,185 | 0,166 | 0,205 |
| 31-2020 | Nordrhein-Westfalen    | 0,394 | 0,376 | 0,412 |
| 31-2020 | Rheinland-Pfalz        | 0,138 | 0,115 | 0,165 |
| 31-2020 | Schleswig-Holstein     | 0,239 | 0,203 | 0,28  |
| 31-2020 | Saarland               | 0,156 | 0,107 | 0,219 |
| 31-2020 | Sachsen                | 0,035 | 0,024 | 0,05  |
| 31-2020 | Sachsen-Anhalt         | 0,084 | 0,06  | 0,115 |
| 31-2020 | Thuringen              | 0,063 | 0,042 | 0,091 |
| 32-2020 | Brandenburg            | 0,125 | 0,097 | 0,159 |
| 32-2020 | Berlin                 | 0,49  | 0,442 | 0,542 |
| 32-2020 | Baden-Wuerttemberg     | 0,183 | 0,166 | 0,2   |
| 32-2020 | Bayern                 | 0,225 | 0,209 | 0,243 |
| 32-2020 | Bremen                 | 0,142 | 0,089 | 0,215 |
| 32-2020 | Hessen                 | 0,377 | 0,348 | 0,409 |
| 32-2020 | Hamburg                | 0,241 | 0,214 | 0,272 |
| 32-2020 | Mecklenburg-Vorpommern | 0,161 | 0,122 | 0,209 |
| 32-2020 | Niedersachsen          | 0,235 | 0,213 | 0,258 |
| 32-2020 | Nordrhein-Westfalen    | 0,485 | 0,466 | 0,505 |
| 32-2020 | Rheinland-Pfalz        | 0,322 | 0,286 | 0,362 |
| 32-2020 | Schleswig-Holstein     | 0,189 | 0,156 | 0,226 |
| 32-2020 | Saarland               | 0,178 | 0,126 | 0,245 |
| 32-2020 | Sachsen                | 0,12  | 0,098 | 0,145 |
| 32-2020 | Sachsen-Anhalt         | 0,074 | 0,051 | 0,102 |
| 32-2020 | Thuringen              | 0,113 | 0,084 | 0,148 |
| 33-2020 | Brandenburg            | 0,117 | 0,09  | 0,15  |
| 33-2020 | Berlin                 | 0,699 | 0,641 | 0,76  |
| 33-2020 | Baden-Wuerttemberg     | 0,298 | 0,277 | 0,319 |
| 33-2020 | Bayern                 | 0,361 | 0,341 | 0,381 |

|         |                        |       |       |       |
|---------|------------------------|-------|-------|-------|
| 33-2020 | Bremen                 | 0,236 | 0,169 | 0,32  |
| 33-2020 | Hessen                 | 0,476 | 0,444 | 0,511 |
| 33-2020 | Hamburg                | 0,207 | 0,179 | 0,239 |
| 33-2020 | Mecklenburg-Vorpommern | 0,093 | 0,063 | 0,131 |
| 33-2020 | Niedersachsen          | 0,274 | 0,251 | 0,299 |
| 33-2020 | Nordrhein-Westfalen    | 0,546 | 0,526 | 0,566 |
| 33-2020 | Rheinland-Pfalz        | 0,407 | 0,366 | 0,451 |
| 33-2020 | Schleswig-Holstein     | 0,311 | 0,27  | 0,358 |
| 33-2020 | Saarland               | 0,348 | 0,274 | 0,436 |
| 33-2020 | Sachsen                | 0,098 | 0,079 | 0,121 |
| 33-2020 | Sachsen-Anhalt         | 0,124 | 0,095 | 0,16  |
| 33-2020 | Thüringen              | 0,155 | 0,121 | 0,195 |
| 34-2020 | Brandenburg            | 0,188 | 0,153 | 0,228 |
| 34-2020 | Berlin                 | 0,598 | 0,545 | 0,654 |
| 34-2020 | Baden-Wuerttemberg     | 0,565 | 0,538 | 0,592 |
| 34-2020 | Bayern                 | 0,544 | 0,521 | 0,568 |
| 34-2020 | Bremen                 | 0,331 | 0,252 | 0,426 |
| 34-2020 | Hessen                 | 0,6   | 0,566 | 0,636 |
| 34-2020 | Hamburg                | 0,185 | 0,159 | 0,214 |
| 34-2020 | Mecklenburg-Vorpommern | 0,067 | 0,042 | 0,1   |
| 34-2020 | Niedersachsen          | 0,349 | 0,323 | 0,377 |
| 34-2020 | Nordrhein-Westfalen    | 0,461 | 0,443 | 0,481 |
| 34-2020 | Rheinland-Pfalz        | 0,54  | 0,493 | 0,59  |
| 34-2020 | Schleswig-Holstein     | 0,179 | 0,147 | 0,215 |
| 34-2020 | Saarland               | 0,337 | 0,264 | 0,423 |
| 34-2020 | Sachsen                | 0,108 | 0,088 | 0,132 |
| 34-2020 | Sachsen-Anhalt         | 0,13  | 0,1   | 0,167 |
| 34-2020 | Thüringen              | 0,124 | 0,094 | 0,161 |
| 35-2020 | Brandenburg            | 0,126 | 0,098 | 0,159 |
| 35-2020 | Berlin                 | 0,616 | 0,562 | 0,673 |
| 35-2020 | Baden-Wuerttemberg     | 0,569 | 0,543 | 0,596 |
| 35-2020 | Bayern                 | 0,534 | 0,512 | 0,557 |
| 35-2020 | Bremen                 | 0,405 | 0,324 | 0,5   |
| 35-2020 | Hessen                 | 0,438 | 0,408 | 0,47  |
| 35-2020 | Hamburg                | 0,191 | 0,166 | 0,219 |
| 35-2020 | Mecklenburg-Vorpommern | 0,038 | 0,02  | 0,064 |
| 35-2020 | Niedersachsen          | 0,319 | 0,294 | 0,344 |
| 35-2020 | Nordrhein-Westfalen    | 0,371 | 0,353 | 0,389 |
| 35-2020 | Rheinland-Pfalz        | 0,46  | 0,416 | 0,506 |
| 35-2020 | Schleswig-Holstein     | 0,193 | 0,16  | 0,23  |
| 35-2020 | Saarland               | 0,33  | 0,258 | 0,416 |
| 35-2020 | Sachsen                | 0,154 | 0,13  | 0,183 |
| 35-2020 | Sachsen-Anhalt         | 0,12  | 0,091 | 0,156 |
| 35-2020 | Thüringen              | 0,157 | 0,123 | 0,198 |
| 36-2020 | Brandenburg            | 0,111 | 0,085 | 0,143 |
| 36-2020 | Berlin                 | 0,669 | 0,613 | 0,729 |

|         |                        |       |       |       |
|---------|------------------------|-------|-------|-------|
| 36-2020 | Baden-Wuerttemberg     | 0,551 | 0,525 | 0,578 |
| 36-2020 | Bayern                 | 0,548 | 0,526 | 0,571 |
| 36-2020 | Bremen                 | 0,353 | 0,279 | 0,439 |
| 36-2020 | Hessen                 | 0,402 | 0,373 | 0,433 |
| 36-2020 | Hamburg                | 0,2   | 0,177 | 0,225 |
| 36-2020 | Mecklenburg-Vorpommern | 0,064 | 0,04  | 0,096 |
| 36-2020 | Niedersachsen          | 0,28  | 0,257 | 0,305 |
| 36-2020 | Nordrhein-Westfalen    | 0,349 | 0,333 | 0,366 |
| 36-2020 | Rheinland-Pfalz        | 0,343 | 0,306 | 0,383 |
| 36-2020 | Schleswig-Holstein     | 0,157 | 0,128 | 0,191 |
| 36-2020 | Saarland               | 0,22  | 0,162 | 0,293 |
| 36-2020 | Sachsen                | 0,209 | 0,181 | 0,241 |
| 36-2020 | Sachsen-Anhalt         | 0,093 | 0,067 | 0,125 |
| 36-2020 | Thuringen              | 0,145 | 0,113 | 0,185 |
| 37-2020 | Brandenburg            | 0,15  | 0,119 | 0,186 |
| 37-2020 | Berlin                 | 0,736 | 0,677 | 0,799 |
| 37-2020 | Baden-Wuerttemberg     | 0,534 | 0,509 | 0,561 |
| 37-2020 | Bayern                 | 0,625 | 0,602 | 0,649 |
| 37-2020 | Bremen                 | 0,314 | 0,242 | 0,401 |
| 37-2020 | Hessen                 | 0,422 | 0,392 | 0,454 |
| 37-2020 | Hamburg                | 0,223 | 0,199 | 0,249 |
| 37-2020 | Mecklenburg-Vorpommern | 0,098 | 0,068 | 0,137 |
| 37-2020 | Niedersachsen          | 0,315 | 0,292 | 0,339 |
| 37-2020 | Nordrhein-Westfalen    | 0,391 | 0,374 | 0,409 |
| 37-2020 | Rheinland-Pfalz        | 0,422 | 0,381 | 0,466 |
| 37-2020 | Schleswig-Holstein     | 0,173 | 0,142 | 0,208 |
| 37-2020 | Saarland               | 0,212 | 0,155 | 0,284 |
| 37-2020 | Sachsen                | 0,286 | 0,254 | 0,322 |
| 37-2020 | Sachsen-Anhalt         | 0,148 | 0,115 | 0,186 |
| 37-2020 | Thuringen              | 0,242 | 0,199 | 0,291 |
| 38-2020 | Brandenburg            | 0,163 | 0,131 | 0,201 |
| 38-2020 | Berlin                 | 1,079 | 1,007 | 1,154 |
| 38-2020 | Baden-Wuerttemberg     | 0,594 | 0,567 | 0,621 |
| 38-2020 | Bayern                 | 0,636 | 0,614 | 0,66  |
| 38-2020 | Bremen                 | 0,385 | 0,306 | 0,478 |
| 38-2020 | Hessen                 | 0,428 | 0,398 | 0,46  |
| 38-2020 | Hamburg                | 0,238 | 0,216 | 0,263 |
| 38-2020 | Mecklenburg-Vorpommern | 0,14  | 0,103 | 0,185 |
| 38-2020 | Niedersachsen          | 0,455 | 0,427 | 0,483 |
| 38-2020 | Nordrhein-Westfalen    | 0,508 | 0,49  | 0,527 |
| 38-2020 | Rheinland-Pfalz        | 0,407 | 0,367 | 0,451 |
| 38-2020 | Schleswig-Holstein     | 0,31  | 0,269 | 0,356 |
| 38-2020 | Saarland               | 0,294 | 0,226 | 0,376 |
| 38-2020 | Sachsen                | 0,366 | 0,329 | 0,405 |
| 38-2020 | Sachsen-Anhalt         | 0,21  | 0,171 | 0,255 |
| 38-2020 | Thuringen              | 0,291 | 0,245 | 0,344 |

|         |                        |       |       |       |
|---------|------------------------|-------|-------|-------|
| 39-2020 | Brandenburg            | 0,238 | 0,199 | 0,283 |
| 39-2020 | Berlin                 | 1,399 | 1,317 | 1,485 |
| 39-2020 | Baden-Wuerttemberg     | 0,563 | 0,537 | 0,589 |
| 39-2020 | Bayern                 | 0,556 | 0,533 | 0,579 |
| 39-2020 | Bremen                 | 0,481 | 0,407 | 0,564 |
| 39-2020 | Hessen                 | 0,555 | 0,521 | 0,59  |
| 39-2020 | Hamburg                | 0,279 | 0,255 | 0,304 |
| 39-2020 | Mecklenburg-Vorpommern | 0,15  | 0,112 | 0,197 |
| 39-2020 | Niedersachsen          | 0,457 | 0,429 | 0,486 |
| 39-2020 | Nordrhein-Westfalen    | 0,563 | 0,545 | 0,582 |
| 39-2020 | Rheinland-Pfalz        | 0,498 | 0,454 | 0,546 |
| 39-2020 | Schleswig-Holstein     | 0,377 | 0,332 | 0,427 |
| 39-2020 | Saarland               | 0,295 | 0,228 | 0,377 |
| 39-2020 | Sachsen                | 0,395 | 0,357 | 0,435 |
| 39-2020 | Sachsen-Anhalt         | 0,319 | 0,271 | 0,373 |
| 39-2020 | Thueringen             | 0,244 | 0,201 | 0,293 |
| 40-2020 | Brandenburg            | 0,414 | 0,363 | 0,47  |
| 40-2020 | Berlin                 | 2,002 | 1,904 | 2,104 |
| 40-2020 | Baden-Wuerttemberg     | 0,579 | 0,554 | 0,605 |
| 40-2020 | Bayern                 | 0,56  | 0,537 | 0,583 |
| 40-2020 | Bremen                 | 0,664 | 0,584 | 0,753 |
| 40-2020 | Hessen                 | 0,635 | 0,601 | 0,67  |
| 40-2020 | Hamburg                | 0,336 | 0,311 | 0,364 |
| 40-2020 | Mecklenburg-Vorpommern | 0,355 | 0,297 | 0,422 |
| 40-2020 | Niedersachsen          | 0,554 | 0,525 | 0,585 |
| 40-2020 | Nordrhein-Westfalen    | 0,708 | 0,687 | 0,729 |
| 40-2020 | Rheinland-Pfalz        | 0,624 | 0,575 | 0,676 |
| 40-2020 | Schleswig-Holstein     | 0,382 | 0,336 | 0,432 |
| 40-2020 | Saarland               | 0,643 | 0,542 | 0,756 |
| 40-2020 | Sachsen                | 0,414 | 0,377 | 0,455 |
| 40-2020 | Sachsen-Anhalt         | 0,326 | 0,277 | 0,381 |
| 40-2020 | Thueringen             | 0,347 | 0,295 | 0,404 |
| 41-2020 | Brandenburg            | 0,667 | 0,605 | 0,735 |
| 41-2020 | Berlin                 | 3,111 | 2,989 | 3,238 |
| 41-2020 | Baden-Wuerttemberg     | 0,868 | 0,84  | 0,896 |
| 41-2020 | Bayern                 | 0,802 | 0,777 | 0,829 |
| 41-2020 | Bremen                 | 0,878 | 0,799 | 0,962 |
| 41-2020 | Hessen                 | 0,834 | 0,799 | 0,87  |
| 41-2020 | Hamburg                | 0,363 | 0,337 | 0,391 |
| 41-2020 | Mecklenburg-Vorpommern | 0,382 | 0,322 | 0,45  |
| 41-2020 | Niedersachsen          | 0,76  | 0,727 | 0,794 |
| 41-2020 | Nordrhein-Westfalen    | 0,95  | 0,929 | 0,973 |
| 41-2020 | Rheinland-Pfalz        | 0,999 | 0,939 | 1,063 |
| 41-2020 | Schleswig-Holstein     | 0,467 | 0,417 | 0,522 |
| 41-2020 | Saarland               | 1,26  | 1,122 | 1,411 |
| 41-2020 | Sachsen                | 0,793 | 0,747 | 0,841 |

|         |                        |       |       |       |
|---------|------------------------|-------|-------|-------|
| 41-2020 | Sachsen-Anhalt         | 0,387 | 0,334 | 0,446 |
| 41-2020 | Thuringen              | 0,504 | 0,442 | 0,572 |
| 42-2020 | Brandenburg            | 1,088 | 1,011 | 1,169 |
| 42-2020 | Berlin                 | 4,331 | 4,186 | 4,479 |
| 42-2020 | Baden-Wuerttemberg     | 1,179 | 1,149 | 1,209 |
| 42-2020 | Bayern                 | 1,263 | 1,232 | 1,293 |
| 42-2020 | Bremen                 | 0,947 | 0,866 | 1,034 |
| 42-2020 | Hessen                 | 1,141 | 1,105 | 1,178 |
| 42-2020 | Hamburg                | 0,443 | 0,416 | 0,471 |
| 42-2020 | Mecklenburg-Vorpommern | 0,673 | 0,597 | 0,757 |
| 42-2020 | Niedersachsen          | 1,016 | 0,98  | 1,053 |
| 42-2020 | Nordrhein-Westfalen    | 1,208 | 1,185 | 1,23  |
| 42-2020 | Rheinland-Pfalz        | 1,562 | 1,488 | 1,639 |
| 42-2020 | Schleswig-Holstein     | 0,631 | 0,574 | 0,691 |
| 42-2020 | Saarland               | 2,219 | 2,055 | 2,394 |
| 42-2020 | Sachsen                | 1,252 | 1,199 | 1,307 |
| 42-2020 | Sachsen-Anhalt         | 0,667 | 0,599 | 0,739 |
| 42-2020 | Thuringen              | 0,97  | 0,887 | 1,059 |
| 43-2020 | Brandenburg            | 1,457 | 1,377 | 1,541 |
| 43-2020 | Berlin                 | 6,33  | 6,155 | 6,509 |
| 43-2020 | Baden-Wuerttemberg     | 1,622 | 1,591 | 1,654 |
| 43-2020 | Bayern                 | 1,952 | 1,918 | 1,987 |
| 43-2020 | Bremen                 | 1,254 | 1,169 | 1,343 |
| 43-2020 | Hessen                 | 1,617 | 1,581 | 1,655 |
| 43-2020 | Hamburg                | 0,736 | 0,704 | 0,769 |
| 43-2020 | Mecklenburg-Vorpommern | 0,997 | 0,908 | 1,092 |
| 43-2020 | Niedersachsen          | 1,318 | 1,281 | 1,356 |
| 43-2020 | Nordrhein-Westfalen    | 1,634 | 1,612 | 1,656 |
| 43-2020 | Rheinland-Pfalz        | 2,459 | 2,372 | 2,548 |
| 43-2020 | Schleswig-Holstein     | 1,107 | 1,042 | 1,174 |
| 43-2020 | Saarland               | 3,106 | 2,919 | 3,3   |
| 43-2020 | Sachsen                | 1,57  | 1,519 | 1,623 |
| 43-2020 | Sachsen-Anhalt         | 1,329 | 1,241 | 1,422 |
| 43-2020 | Thuringen              | 1,667 | 1,564 | 1,774 |
| 44-2020 | Brandenburg            | 1,799 | 1,721 | 1,88  |
| 44-2020 | Berlin                 | 8,063 | 7,865 | 8,265 |
| 44-2020 | Baden-Wuerttemberg     | 1,907 | 1,876 | 1,938 |
| 44-2020 | Bayern                 | 2,564 | 2,527 | 2,601 |
| 44-2020 | Bremen                 | 2,6   | 2,464 | 2,742 |
| 44-2020 | Hessen                 | 2,01  | 1,971 | 2,049 |
| 44-2020 | Hamburg                | 1,053 | 1,013 | 1,093 |
| 44-2020 | Mecklenburg-Vorpommern | 1,415 | 1,316 | 1,519 |
| 44-2020 | Niedersachsen          | 1,688 | 1,651 | 1,726 |
| 44-2020 | Nordrhein-Westfalen    | 1,997 | 1,974 | 2,02  |
| 44-2020 | Rheinland-Pfalz        | 3,208 | 3,116 | 3,302 |
| 44-2020 | Schleswig-Holstein     | 1,294 | 1,232 | 1,358 |

|         |                        |        |        |        |
|---------|------------------------|--------|--------|--------|
| 44-2020 | Saarland               | 4,386  | 4,178  | 4,602  |
| 44-2020 | Sachsen                | 2,013  | 1,963  | 2,064  |
| 44-2020 | Sachsen-Anhalt         | 1,639  | 1,551  | 1,731  |
| 44-2020 | Thuringen              | 2,063  | 1,955  | 2,175  |
| 45-2020 | Brandenburg            | 1,9    | 1,821  | 1,981  |
| 45-2020 | Berlin                 | 9,181  | 8,97   | 9,396  |
| 45-2020 | Baden-Wuerttemberg     | 1,924  | 1,895  | 1,953  |
| 45-2020 | Bayern                 | 3      | 2,962  | 3,039  |
| 45-2020 | Bremen                 | 2,157  | 2,045  | 2,273  |
| 45-2020 | Hessen                 | 2,126  | 2,086  | 2,166  |
| 45-2020 | Hamburg                | 1,109  | 1,071  | 1,149  |
| 45-2020 | Mecklenburg-Vorpommern | 1,508  | 1,407  | 1,615  |
| 45-2020 | Niedersachsen          | 1,761  | 1,724  | 1,798  |
| 45-2020 | Nordrhein-Westfalen    | 2,004  | 1,982  | 2,026  |
| 45-2020 | Rheinland-Pfalz        | 3,862  | 3,759  | 3,966  |
| 45-2020 | Schleswig-Holstein     | 1,321  | 1,256  | 1,389  |
| 45-2020 | Saarland               | 4,489  | 4,274  | 4,713  |
| 45-2020 | Sachsen                | 2,386  | 2,333  | 2,44   |
| 45-2020 | Sachsen-Anhalt         | 1,811  | 1,718  | 1,907  |
| 45-2020 | Thuringen              | 2,415  | 2,303  | 2,531  |
| 46-2020 | Brandenburg            | 1,829  | 1,755  | 1,906  |
| 46-2020 | Berlin                 | 10,856 | 10,626 | 11,09  |
| 46-2020 | Baden-Wuerttemberg     | 1,835  | 1,807  | 1,864  |
| 46-2020 | Bayern                 | 3,127  | 3,088  | 3,166  |
| 46-2020 | Bremen                 | 1,582  | 1,491  | 1,677  |
| 46-2020 | Hessen                 | 2,179  | 2,139  | 2,219  |
| 46-2020 | Hamburg                | 0,957  | 0,922  | 0,994  |
| 46-2020 | Mecklenburg-Vorpommern | 1,231  | 1,141  | 1,327  |
| 46-2020 | Niedersachsen          | 1,624  | 1,59   | 1,659  |
| 46-2020 | Nordrhein-Westfalen    | 1,977  | 1,956  | 2      |
| 46-2020 | Rheinland-Pfalz        | 4,319  | 4,211  | 4,428  |
| 46-2020 | Schleswig-Holstein     | 1,223  | 1,163  | 1,286  |
| 46-2020 | Saarland               | 4,097  | 3,897  | 4,304  |
| 46-2020 | Sachsen                | 2,176  | 2,129  | 2,225  |
| 46-2020 | Sachsen-Anhalt         | 1,859  | 1,766  | 1,956  |
| 46-2020 | Thuringen              | 2,629  | 2,516  | 2,746  |
| 47-2020 | Brandenburg            | 2,029  | 1,958  | 2,102  |
| 47-2020 | Berlin                 | 10,815 | 10,585 | 11,048 |
| 47-2020 | Baden-Wuerttemberg     | 1,742  | 1,715  | 1,768  |
| 47-2020 | Bayern                 | 3,585  | 3,54   | 3,631  |
| 47-2020 | Bremen                 | 1,399  | 1,313  | 1,489  |
| 47-2020 | Hessen                 | 2,124  | 2,085  | 2,163  |
| 47-2020 | Hamburg                | 0,769  | 0,739  | 0,8    |
| 47-2020 | Mecklenburg-Vorpommern | 1,235  | 1,148  | 1,326  |
| 47-2020 | Niedersachsen          | 1,475  | 1,444  | 1,507  |
| 47-2020 | Nordrhein-Westfalen    | 1,945  | 1,923  | 1,967  |

|         |                        |       |       |        |
|---------|------------------------|-------|-------|--------|
| 47-2020 | Rheinland-Pfalz        | 4,109 | 4,004 | 4,216  |
| 47-2020 | Schleswig-Holstein     | 1,192 | 1,13  | 1,257  |
| 47-2020 | Saarland               | 3,539 | 3,345 | 3,74   |
| 47-2020 | Sachsen                | 2,445 | 2,395 | 2,495  |
| 47-2020 | Sachsen-Anhalt         | 2,042 | 1,949 | 2,138  |
| 47-2020 | Thueringen             | 3,2   | 3,084 | 3,319  |
| 48-2020 | Brandenburg            | 2,082 | 2,009 | 2,156  |
| 48-2020 | Berlin                 | 9,984 | 9,763 | 10,208 |
| 48-2020 | Baden-Wuerttemberg     | 1,932 | 1,902 | 1,963  |
| 48-2020 | Bayern                 | 3,962 | 3,913 | 4,012  |
| 48-2020 | Bremen                 | 1,379 | 1,284 | 1,48   |
| 48-2020 | Hessen                 | 2,136 | 2,095 | 2,179  |
| 48-2020 | Hamburg                | 0,663 | 0,631 | 0,696  |
| 48-2020 | Mecklenburg-Vorpommern | 1,314 | 1,223 | 1,41   |
| 48-2020 | Niedersachsen          | 1,342 | 1,311 | 1,374  |
| 48-2020 | Nordrhein-Westfalen    | 1,897 | 1,875 | 1,92   |
| 48-2020 | Rheinland-Pfalz        | 3,978 | 3,871 | 4,087  |
| 48-2020 | Schleswig-Holstein     | 1,23  | 1,165 | 1,297  |
| 48-2020 | Saarland               | 3,778 | 3,568 | 3,997  |
| 48-2020 | Sachsen                | 2,62  | 2,573 | 2,668  |
| 48-2020 | Sachsen-Anhalt         | 2,368 | 2,272 | 2,466  |
| 48-2020 | Thueringen             | 3,522 | 3,401 | 3,646  |
| 49-2020 | Brandenburg            | 2,503 | 2,42  | 2,588  |
| 49-2020 | Berlin                 | 9,012 | 8,802 | 9,225  |
| 49-2020 | Baden-Wuerttemberg     | 2,317 | 2,282 | 2,352  |
| 49-2020 | Bayern                 | 4,8   | 4,74  | 4,861  |
| 49-2020 | Bremen                 | 1,538 | 1,43  | 1,651  |
| 49-2020 | Hessen                 | 2,496 | 2,447 | 2,547  |
| 49-2020 | Hamburg                | 1,094 | 1,05  | 1,141  |
| 49-2020 | Mecklenburg-Vorpommern | 1,365 | 1,272 | 1,462  |
| 49-2020 | Niedersachsen          | 1,567 | 1,529 | 1,606  |
| 49-2020 | Nordrhein-Westfalen    | 2,264 | 2,236 | 2,291  |
| 49-2020 | Rheinland-Pfalz        | 4,465 | 4,352 | 4,581  |
| 49-2020 | Schleswig-Holstein     | 1,493 | 1,418 | 1,57   |
| 49-2020 | Saarland               | 3,942 | 3,734 | 4,16   |
| 49-2020 | Sachsen                | 3,968 | 3,902 | 4,034  |
| 49-2020 | Sachsen-Anhalt         | 2,726 | 2,625 | 2,831  |
| 49-2020 | Thueringen             | 4,002 | 3,877 | 4,129  |
| 50-2020 | Brandenburg            | 1,726 | 1,561 | 1,904  |
| 50-2020 | Berlin                 | 7,734 | 7,373 | 8,108  |
| 50-2020 | Baden-Wuerttemberg     | 2,495 | 2,415 | 2,577  |
| 50-2020 | Bayern                 | 4,654 | 4,532 | 4,778  |
| 50-2020 | Bremen                 | 2,979 | 2,546 | 3,465  |
| 50-2020 | Hessen                 | 3,215 | 3,093 | 3,341  |
| 50-2020 | Hamburg                | 1,412 | 1,253 | 1,586  |
| 50-2020 | Mecklenburg-Vorpommern | 1,533 | 1,357 | 1,726  |

|         |                     |       |       |       |
|---------|---------------------|-------|-------|-------|
| 50-2020 | Niedersachsen       | 1,282 | 1,203 | 1,365 |
| 50-2020 | Nordrhein-Westfalen | 2,462 | 2,405 | 2,521 |
| 50-2020 | Rheinland-Pfalz     | 3,971 | 3,758 | 4,192 |
| 50-2020 | Schleswig-Holstein  | 1,92  | 1,753 | 2,097 |
| 50-2020 | Saarland            | 3,218 | 2,855 | 3,615 |
| 50-2020 | Sachsen             | 3,763 | 3,62  | 3,91  |
| 50-2020 | Sachsen-Anhalt      | 2,49  | 2,299 | 2,691 |
| 50-2020 | Thuringen           | 3,5   | 3,278 | 3,734 |

Table 2 shows the SMR and corresponding 95% confidence intervals (95%-CI) for German federal states by notification week.

**Table 2: Standardised mortality ratio (SMR) of federal states by notification week**

| Notification week | Federal states         | SMR | 95%-CI: lower limit | 95%-CI: upper limit |
|-------------------|------------------------|-----|---------------------|---------------------|
| 01-2020           | Brandenburg            | 0   | 0                   | 1,469               |
| 01-2020           | Berlin                 | 0   | 0                   | 1,012               |
| 01-2020           | Baden-Wuerttemberg     | 0   | 0                   | 0,333               |
| 01-2020           | Bayern                 | 0   | 0                   | 0,282               |
| 01-2020           | Bremen                 | 0   | 0                   | 5,402               |
| 01-2020           | Hessen                 | 0   | 0                   | 0,589               |
| 01-2020           | Hamburg                | 0   | 0                   | 2,004               |
| 01-2020           | Mecklenburg-Vorpommern | 0   | 0                   | 2,292               |
| 01-2020           | Niedersachsen          | 0   | 0                   | 0,462               |
| 01-2020           | Nordrhein-Westfalen    | 0   | 0                   | 0,206               |
| 01-2020           | Rheinland-Pfalz        | 0   | 0                   | 0,903               |
| 01-2020           | Schleswig-Holstein     | 0   | 0                   | 1,274               |
| 01-2020           | Saarland               | 0   | 0                   | 3,725               |
| 01-2020           | Sachsen                | 0   | 0                   | 0,905               |
| 01-2020           | Sachsen-Anhalt         | 0   | 0                   | 1,671               |
| 01-2020           | Thueringen             | 0   | 0                   | 1,722               |
| 02-2020           | Brandenburg            | 0   | 0                   | 2,938               |
| 02-2020           | Berlin                 | 0   | 0                   | 2,024               |
| 02-2020           | Baden-Wuerttemberg     | 0   | 0                   | 0,667               |
| 02-2020           | Bayern                 | 0   | 0                   | 0,564               |
| 02-2020           | Bremen                 | 0   | 0                   | 10,804              |
| 02-2020           | Hessen                 | 0   | 0                   | 1,178               |
| 02-2020           | Hamburg                | 0   | 0                   | 4,008               |
| 02-2020           | Mecklenburg-Vorpommern | 0   | 0                   | 4,584               |
| 02-2020           | Niedersachsen          | 0   | 0                   | 0,924               |
| 02-2020           | Nordrhein-Westfalen    | 0   | 0                   | 0,411               |
| 02-2020           | Rheinland-Pfalz        | 0   | 0                   | 1,806               |
| 02-2020           | Schleswig-Holstein     | 0   | 0                   | 2,547               |
| 02-2020           | Saarland               | 0   | 0                   | 7,45                |
| 02-2020           | Sachsen                | 0   | 0                   | 1,809               |
| 02-2020           | Sachsen-Anhalt         | 0   | 0                   | 3,341               |
| 02-2020           | Thueringen             | 0   | 0                   | 3,443               |
| 03-2020           | Brandenburg            | 0   | 0                   | 2,938               |
| 03-2020           | Berlin                 | 0   | 0                   | 2,024               |
| 03-2020           | Baden-Wuerttemberg     | 0   | 0                   | 0,667               |
| 03-2020           | Bayern                 | 0   | 0                   | 0,564               |
| 03-2020           | Bremen                 | 0   | 0                   | 10,804              |
| 03-2020           | Hessen                 | 0   | 0                   | 1,178               |
| 03-2020           | Hamburg                | 0   | 0                   | 4,008               |
| 03-2020           | Mecklenburg-Vorpommern | 0   | 0                   | 4,584               |
| 03-2020           | Niedersachsen          | 0   | 0                   | 0,924               |
| 03-2020           | Nordrhein-Westfalen    | 0   | 0                   | 0,411               |

|         |                        |   |   |       |
|---------|------------------------|---|---|-------|
| 03-2020 | Rheinland-Pfalz        | 0 | 0 | 1,806 |
| 03-2020 | Schleswig-Holstein     | 0 | 0 | 2,547 |
| 03-2020 | Saarland               | 0 | 0 | 7,45  |
| 03-2020 | Sachsen                | 0 | 0 | 1,809 |
| 03-2020 | Sachsen-Anhalt         | 0 | 0 | 3,341 |
| 03-2020 | Thueringen             | 0 | 0 | 3,443 |
| 05-2020 | Brandenburg            | 0 | 0 | 0,734 |
| 05-2020 | Berlin                 | 0 | 0 | 0,506 |
| 05-2020 | Baden-Wuerttemberg     | 0 | 0 | 0,167 |
| 05-2020 | Bayern                 | 0 | 0 | 0,141 |
| 05-2020 | Bremen                 | 0 | 0 | 2,701 |
| 05-2020 | Hessen                 | 0 | 0 | 0,294 |
| 05-2020 | Hamburg                | 0 | 0 | 1,002 |
| 05-2020 | Mecklenburg-Vorpommern | 0 | 0 | 1,146 |
| 05-2020 | Niedersachsen          | 0 | 0 | 0,231 |
| 05-2020 | Nordrhein-Westfalen    | 0 | 0 | 0,103 |
| 05-2020 | Rheinland-Pfalz        | 0 | 0 | 0,452 |
| 05-2020 | Schleswig-Holstein     | 0 | 0 | 0,637 |
| 05-2020 | Saarland               | 0 | 0 | 1,862 |
| 05-2020 | Sachsen                | 0 | 0 | 0,452 |
| 05-2020 | Sachsen-Anhalt         | 0 | 0 | 0,835 |
| 05-2020 | Thueringen             | 0 | 0 | 0,861 |
| 06-2020 | Brandenburg            | 0 | 0 | 0,734 |
| 06-2020 | Berlin                 | 0 | 0 | 0,506 |
| 06-2020 | Baden-Wuerttemberg     | 0 | 0 | 0,167 |
| 06-2020 | Bayern                 | 0 | 0 | 0,141 |
| 06-2020 | Bremen                 | 0 | 0 | 2,701 |
| 06-2020 | Hessen                 | 0 | 0 | 0,294 |
| 06-2020 | Hamburg                | 0 | 0 | 1,002 |
| 06-2020 | Mecklenburg-Vorpommern | 0 | 0 | 1,146 |
| 06-2020 | Niedersachsen          | 0 | 0 | 0,231 |
| 06-2020 | Nordrhein-Westfalen    | 0 | 0 | 0,103 |
| 06-2020 | Rheinland-Pfalz        | 0 | 0 | 0,452 |
| 06-2020 | Schleswig-Holstein     | 0 | 0 | 0,637 |
| 06-2020 | Saarland               | 0 | 0 | 1,862 |
| 06-2020 | Sachsen                | 0 | 0 | 0,452 |
| 06-2020 | Sachsen-Anhalt         | 0 | 0 | 0,835 |
| 06-2020 | Thueringen             | 0 | 0 | 0,861 |
| 07-2020 | Brandenburg            | 0 | 0 | 1,469 |
| 07-2020 | Berlin                 | 0 | 0 | 1,012 |
| 07-2020 | Baden-Wuerttemberg     | 0 | 0 | 0,333 |
| 07-2020 | Bayern                 | 0 | 0 | 0,282 |
| 07-2020 | Bremen                 | 0 | 0 | 5,402 |
| 07-2020 | Hessen                 | 0 | 0 | 0,589 |
| 07-2020 | Hamburg                | 0 | 0 | 2,004 |
| 07-2020 | Mecklenburg-Vorpommern | 0 | 0 | 2,292 |

|         |                        |       |       |        |
|---------|------------------------|-------|-------|--------|
| 07-2020 | Niedersachsen          | 0     | 0     | 0,462  |
| 07-2020 | Nordrhein-Westfalen    | 0     | 0     | 0,206  |
| 07-2020 | Rheinland-Pfalz        | 0     | 0     | 0,903  |
| 07-2020 | Schleswig-Holstein     | 0     | 0     | 1,274  |
| 07-2020 | Saarland               | 0     | 0     | 3,725  |
| 07-2020 | Sachsen                | 0     | 0     | 0,905  |
| 07-2020 | Sachsen-Anhalt         | 0     | 0     | 1,671  |
| 07-2020 | Thuringen              | 0     | 0     | 1,722  |
| 08-2020 | Brandenburg            | 0     | 0     | 2,938  |
| 08-2020 | Berlin                 | 0     | 0     | 2,024  |
| 08-2020 | Baden-Wuerttemberg     | 0     | 0     | 0,667  |
| 08-2020 | Bayern                 | 0     | 0     | 0,564  |
| 08-2020 | Bremen                 | 0     | 0     | 10,804 |
| 08-2020 | Hessen                 | 0     | 0     | 1,178  |
| 08-2020 | Hamburg                | 0     | 0     | 4,008  |
| 08-2020 | Mecklenburg-Vorpommern | 0     | 0     | 4,584  |
| 08-2020 | Niedersachsen          | 0     | 0     | 0,924  |
| 08-2020 | Nordrhein-Westfalen    | 0     | 0     | 0,411  |
| 08-2020 | Rheinland-Pfalz        | 0     | 0     | 1,806  |
| 08-2020 | Schleswig-Holstein     | 0     | 0     | 2,547  |
| 08-2020 | Saarland               | 0     | 0     | 7,45   |
| 08-2020 | Sachsen                | 0     | 0     | 1,809  |
| 08-2020 | Sachsen-Anhalt         | 0     | 0     | 3,341  |
| 08-2020 | Thuringen              | 0     | 0     | 3,443  |
| 09-2020 | Brandenburg            | 0     | 0     | 0,42   |
| 09-2020 | Berlin                 | 0     | 0     | 0,289  |
| 09-2020 | Baden-Wuerttemberg     | 0     | 0     | 0,095  |
| 09-2020 | Bayern                 | 0     | 0     | 0,081  |
| 09-2020 | Bremen                 | 0     | 0     | 1,543  |
| 09-2020 | Hessen                 | 0     | 0     | 0,168  |
| 09-2020 | Hamburg                | 0     | 0     | 0,573  |
| 09-2020 | Mecklenburg-Vorpommern | 0     | 0     | 0,655  |
| 09-2020 | Niedersachsen          | 0     | 0     | 0,132  |
| 09-2020 | Nordrhein-Westfalen    | 0     | 0     | 0,058  |
| 09-2020 | Rheinland-Pfalz        | 0     | 0     | 0,258  |
| 09-2020 | Schleswig-Holstein     | 0     | 0     | 0,364  |
| 09-2020 | Saarland               | 0     | 0     | 1,064  |
| 09-2020 | Sachsen                | 0     | 0     | 0,258  |
| 09-2020 | Sachsen-Anhalt         | 0     | 0     | 0,477  |
| 09-2020 | Thuringen              | 0     | 0     | 0,492  |
| 10-2020 | Brandenburg            | 0     | 0     | 0,419  |
| 10-2020 | Berlin                 | 0     | 0     | 0,289  |
| 10-2020 | Baden-Wuerttemberg     | 0,126 | 0,041 | 0,295  |
| 10-2020 | Bayern                 | 0,021 | 0,001 | 0,119  |
| 10-2020 | Bremen                 | 0     | 0     | 1,543  |
| 10-2020 | Hessen                 | 0     | 0     | 0,167  |

|         |                        |       |       |       |
|---------|------------------------|-------|-------|-------|
| 10-2020 | Hamburg                | 0,143 | 0,004 | 0,795 |
| 10-2020 | Mecklenburg-Vorpommern | 0     | 0     | 0,655 |
| 10-2020 | Niedersachsen          | 0     | 0     | 0,132 |
| 10-2020 | Nordrhein-Westfalen    | 0,075 | 0,024 | 0,175 |
| 10-2020 | Rheinland-Pfalz        | 0     | 0     | 0,258 |
| 10-2020 | Schleswig-Holstein     | 0     | 0     | 0,364 |
| 10-2020 | Saarland               | 0     | 0     | 1,064 |
| 10-2020 | Sachsen                | 0     | 0     | 0,258 |
| 10-2020 | Sachsen-Anhalt         | 0     | 0     | 0,477 |
| 10-2020 | Thüringen              | 0     | 0     | 0,492 |
| 11-2020 | Brandenburg            | 0     | 0     | 0,413 |
| 11-2020 | Berlin                 | 0     | 0     | 0,289 |
| 11-2020 | Baden-Wuerttemberg     | 0,538 | 0,357 | 0,777 |
| 11-2020 | Bayern                 | 0,331 | 0,196 | 0,524 |
| 11-2020 | Bremen                 | 0     | 0     | 1,219 |
| 11-2020 | Hessen                 | 0,041 | 0,001 | 0,228 |
| 11-2020 | Hamburg                | 0,106 | 0,022 | 0,309 |
| 11-2020 | Mecklenburg-Vorpommern | 0     | 0     | 0,646 |
| 11-2020 | Niedersachsen          | 0,093 | 0,019 | 0,272 |
| 11-2020 | Nordrhein-Westfalen    | 0,317 | 0,209 | 0,462 |
| 11-2020 | Rheinland-Pfalz        | 0,067 | 0,002 | 0,375 |
| 11-2020 | Schleswig-Holstein     | 0,094 | 0,002 | 0,525 |
| 11-2020 | Saarland               | 0     | 0     | 0,995 |
| 11-2020 | Sachsen                | 0,128 | 0,015 | 0,462 |
| 11-2020 | Sachsen-Anhalt         | 0,128 | 0,003 | 0,716 |
| 11-2020 | Thüringen              | 0     | 0     | 0,485 |
| 12-2020 | Brandenburg            | 0,197 | 0,024 | 0,712 |
| 12-2020 | Berlin                 | 0,627 | 0,271 | 1,236 |
| 12-2020 | Baden-Wuerttemberg     | 1,461 | 1,221 | 1,733 |
| 12-2020 | Bayern                 | 1,373 | 1,146 | 1,633 |
| 12-2020 | Bremen                 | 0,219 | 0,006 | 1,219 |
| 12-2020 | Hessen                 | 0,355 | 0,183 | 0,62  |
| 12-2020 | Hamburg                | 0,157 | 0,068 | 0,309 |
| 12-2020 | Mecklenburg-Vorpommern | 0     | 0     | 0,595 |
| 12-2020 | Niedersachsen          | 0,455 | 0,274 | 0,71  |
| 12-2020 | Nordrhein-Westfalen    | 0,867 | 0,721 | 1,033 |
| 12-2020 | Rheinland-Pfalz        | 0,834 | 0,456 | 1,399 |
| 12-2020 | Schleswig-Holstein     | 1,085 | 0,578 | 1,856 |
| 12-2020 | Saarland               | 1,062 | 0,345 | 2,478 |
| 12-2020 | Sachsen                | 0,221 | 0,072 | 0,515 |
| 12-2020 | Sachsen-Anhalt         | 0,466 | 0,127 | 1,192 |
| 12-2020 | Thüringen              | 0,368 | 0,076 | 1,075 |
| 13-2020 | Brandenburg            | 1,035 | 0,517 | 1,853 |
| 13-2020 | Berlin                 | 2,117 | 1,395 | 3,08  |
| 13-2020 | Baden-Wuerttemberg     | 2,738 | 2,452 | 3,049 |
| 13-2020 | Bayern                 | 3,671 | 3,344 | 4,022 |

|         |                        |       |       |       |
|---------|------------------------|-------|-------|-------|
| 13-2020 | Bremen                 | 0,816 | 0,222 | 2,09  |
| 13-2020 | Hessen                 | 1,57  | 1,211 | 2,001 |
| 13-2020 | Hamburg                | 0,713 | 0,516 | 0,96  |
| 13-2020 | Mecklenburg-Vorpommern | 0,823 | 0,267 | 1,921 |
| 13-2020 | Niedersachsen          | 2,168 | 1,79  | 2,603 |
| 13-2020 | Nordrhein-Westfalen    | 1,543 | 1,358 | 1,747 |
| 13-2020 | Rheinland-Pfalz        | 1,692 | 1,15  | 2,401 |
| 13-2020 | Schleswig-Holstein     | 1,416 | 0,865 | 2,187 |
| 13-2020 | Saarland               | 3,629 | 2,301 | 5,446 |
| 13-2020 | Sachsen                | 1,192 | 0,815 | 1,682 |
| 13-2020 | Sachsen-Anhalt         | 1,771 | 1,012 | 2,876 |
| 13-2020 | Thueringen             | 1,76  | 0,985 | 2,903 |
| 14-2020 | Brandenburg            | 4,817 | 3,638 | 6,255 |
| 14-2020 | Berlin                 | 3,606 | 2,64  | 4,81  |
| 14-2020 | Baden-Wuerttemberg     | 4,177 | 3,812 | 4,567 |
| 14-2020 | Bayern                 | 4,86  | 4,498 | 5,244 |
| 14-2020 | Bremen                 | 2,451 | 1,223 | 4,385 |
| 14-2020 | Hessen                 | 2,729 | 2,237 | 3,298 |
| 14-2020 | Hamburg                | 1,247 | 0,968 | 1,581 |
| 14-2020 | Mecklenburg-Vorpommern | 1,314 | 0,567 | 2,588 |
| 14-2020 | Niedersachsen          | 2,898 | 2,435 | 3,424 |
| 14-2020 | Nordrhein-Westfalen    | 2,644 | 2,395 | 2,912 |
| 14-2020 | Rheinland-Pfalz        | 2,881 | 2,152 | 3,778 |
| 14-2020 | Schleswig-Holstein     | 2,243 | 1,534 | 3,166 |
| 14-2020 | Saarland               | 6,851 | 5,215 | 8,837 |
| 14-2020 | Sachsen                | 2,975 | 2,351 | 3,713 |
| 14-2020 | Sachsen-Anhalt         | 1,313 | 0,655 | 2,349 |
| 14-2020 | Thueringen             | 2,828 | 1,793 | 4,244 |
| 15-2020 | Brandenburg            | 3,551 | 2,537 | 4,835 |
| 15-2020 | Berlin                 | 3,606 | 2,64  | 4,81  |
| 15-2020 | Baden-Wuerttemberg     | 4,265 | 3,834 | 4,731 |
| 15-2020 | Bayern                 | 4,496 | 4,117 | 4,9   |
| 15-2020 | Bremen                 | 1,899 | 0,764 | 3,913 |
| 15-2020 | Hessen                 | 3,628 | 3,035 | 4,302 |
| 15-2020 | Hamburg                | 1,269 | 0,966 | 1,638 |
| 15-2020 | Mecklenburg-Vorpommern | 0,698 | 0,19  | 1,787 |
| 15-2020 | Niedersachsen          | 2,602 | 2,166 | 3,101 |
| 15-2020 | Nordrhein-Westfalen    | 2,811 | 2,532 | 3,113 |
| 15-2020 | Rheinland-Pfalz        | 3,522 | 2,687 | 4,533 |
| 15-2020 | Schleswig-Holstein     | 2,406 | 1,623 | 3,434 |
| 15-2020 | Saarland               | 5,888 | 4,124 | 8,151 |
| 15-2020 | Sachsen                | 2,18  | 1,578 | 2,936 |
| 15-2020 | Sachsen-Anhalt         | 0,979 | 0,423 | 1,929 |
| 15-2020 | Thueringen             | 4,326 | 3,014 | 6,017 |
| 16-2020 | Brandenburg            | 2,151 | 1,348 | 3,257 |
| 16-2020 | Berlin                 | 1,646 | 1,019 | 2,517 |

|         |                        |       |       |       |
|---------|------------------------|-------|-------|-------|
| 16-2020 | Baden-Wuerttemberg     | 3,473 | 3,024 | 3,969 |
| 16-2020 | Bayern                 | 4,272 | 3,846 | 4,732 |
| 16-2020 | Bremen                 | 1,707 | 0,626 | 3,715 |
| 16-2020 | Hessen                 | 2,66  | 2,128 | 3,286 |
| 16-2020 | Hamburg                | 1,321 | 0,943 | 1,798 |
| 16-2020 | Mecklenburg-Vorpommern | 0,353 | 0,043 | 1,274 |
| 16-2020 | Niedersachsen          | 2,249 | 1,806 | 2,768 |
| 16-2020 | Nordrhein-Westfalen    | 2,262 | 1,98  | 2,572 |
| 16-2020 | Rheinland-Pfalz        | 2,332 | 1,642 | 3,214 |
| 16-2020 | Schleswig-Holstein     | 2,225 | 1,44  | 3,285 |
| 16-2020 | Saarland               | 4     | 2,37  | 6,321 |
| 16-2020 | Sachsen                | 1,346 | 0,844 | 2,038 |
| 16-2020 | Sachsen-Anhalt         | 0,623 | 0,202 | 1,453 |
| 16-2020 | Thueringen             | 3,013 | 1,931 | 4,484 |
| 17-2020 | Brandenburg            | 2,044 | 1,248 | 3,157 |
| 17-2020 | Berlin                 | 1,882 | 1,206 | 2,8   |
| 17-2020 | Baden-Wuerttemberg     | 2,339 | 1,95  | 2,783 |
| 17-2020 | Bayern                 | 2,844 | 2,459 | 3,271 |
| 17-2020 | Bremen                 | 1,049 | 0,286 | 2,685 |
| 17-2020 | Hessen                 | 1,801 | 1,341 | 2,368 |
| 17-2020 | Hamburg                | 1,102 | 0,698 | 1,653 |
| 17-2020 | Mecklenburg-Vorpommern | 0,178 | 0,004 | 0,989 |
| 17-2020 | Niedersachsen          | 1,426 | 1,065 | 1,87  |
| 17-2020 | Nordrhein-Westfalen    | 1,269 | 1,047 | 1,523 |
| 17-2020 | Rheinland-Pfalz        | 1,49  | 0,934 | 2,256 |
| 17-2020 | Schleswig-Holstein     | 1,702 | 1,009 | 2,69  |
| 17-2020 | Saarland               | 4,503 | 2,669 | 7,117 |
| 17-2020 | Sachsen                | 0,985 | 0,551 | 1,624 |
| 17-2020 | Sachsen-Anhalt         | 1,138 | 0,52  | 2,16  |
| 17-2020 | Thueringen             | 2,72  | 1,705 | 4,119 |
| 18-2020 | Brandenburg            | 0,958 | 0,438 | 1,818 |
| 18-2020 | Berlin                 | 1,882 | 1,206 | 2,8   |
| 18-2020 | Baden-Wuerttemberg     | 1,311 | 0,995 | 1,695 |
| 18-2020 | Bayern                 | 1,676 | 1,368 | 2,032 |
| 18-2020 | Bremen                 | 0,838 | 0,173 | 2,449 |
| 18-2020 | Hessen                 | 0,646 | 0,376 | 1,034 |
| 18-2020 | Hamburg                | 0,547 | 0,22  | 1,126 |
| 18-2020 | Mecklenburg-Vorpommern | 0     | 0     | 0,65  |
| 18-2020 | Niedersachsen          | 0,973 | 0,665 | 1,373 |
| 18-2020 | Nordrhein-Westfalen    | 0,846 | 0,653 | 1,079 |
| 18-2020 | Rheinland-Pfalz        | 0,756 | 0,377 | 1,353 |
| 18-2020 | Schleswig-Holstein     | 0,477 | 0,155 | 1,113 |
| 18-2020 | Saarland               | 1,106 | 0,301 | 2,831 |
| 18-2020 | Sachsen                | 0,664 | 0,318 | 1,221 |
| 18-2020 | Sachsen-Anhalt         | 0,258 | 0,031 | 0,932 |
| 18-2020 | Thueringen             | 3,433 | 2,262 | 4,994 |

|         |                        |       |       |       |
|---------|------------------------|-------|-------|-------|
| 19-2020 | Brandenburg            | 0,334 | 0,069 | 0,976 |
| 19-2020 | Berlin                 | 0,314 | 0,085 | 0,803 |
| 19-2020 | Baden-Wuerttemberg     | 0,942 | 0,673 | 1,282 |
| 19-2020 | Bayern                 | 1,166 | 0,9   | 1,486 |
| 19-2020 | Bremen                 | 1,463 | 0,588 | 3,013 |
| 19-2020 | Hessen                 | 0,772 | 0,465 | 1,205 |
| 19-2020 | Hamburg                | 0,883 | 0,404 | 1,677 |
| 19-2020 | Mecklenburg-Vorpommern | 0     | 0     | 0,653 |
| 19-2020 | Niedersachsen          | 0,701 | 0,444 | 1,051 |
| 19-2020 | Nordrhein-Westfalen    | 0,604 | 0,439 | 0,811 |
| 19-2020 | Rheinland-Pfalz        | 0,548 | 0,237 | 1,081 |
| 19-2020 | Schleswig-Holstein     | 0,278 | 0,057 | 0,812 |
| 19-2020 | Saarland               | 1,154 | 0,314 | 2,955 |
| 19-2020 | Sachsen                | 0,326 | 0,106 | 0,761 |
| 19-2020 | Sachsen-Anhalt         | 0,512 | 0,139 | 1,311 |
| 19-2020 | Thueringen             | 1,813 | 0,991 | 3,042 |
| 20-2020 | Brandenburg            | 0,113 | 0,003 | 0,628 |
| 20-2020 | Berlin                 | 0,314 | 0,085 | 0,803 |
| 20-2020 | Baden-Wuerttemberg     | 0,603 | 0,39  | 0,891 |
| 20-2020 | Bayern                 | 0,826 | 0,603 | 1,106 |
| 20-2020 | Bremen                 | 0,64  | 0,132 | 1,871 |
| 20-2020 | Hessen                 | 0,607 | 0,34  | 1,002 |
| 20-2020 | Hamburg                | 0,342 | 0,071 | 1,001 |
| 20-2020 | Mecklenburg-Vorpommern | 0     | 0     | 0,655 |
| 20-2020 | Niedersachsen          | 0,471 | 0,258 | 0,791 |
| 20-2020 | Nordrhein-Westfalen    | 0,393 | 0,259 | 0,571 |
| 20-2020 | Rheinland-Pfalz        | 0,139 | 0,017 | 0,5   |
| 20-2020 | Schleswig-Holstein     | 0,098 | 0,002 | 0,547 |
| 20-2020 | Saarland               | 0,577 | 0,07  | 2,084 |
| 20-2020 | Sachsen                | 0,604 | 0,276 | 1,147 |
| 20-2020 | Sachsen-Anhalt         | 0     | 0     | 0,475 |
| 20-2020 | Thueringen             | 1,042 | 0,45  | 2,054 |
| 21-2020 | Brandenburg            | 0     | 0     | 0,417 |
| 21-2020 | Berlin                 | 0,47  | 0,173 | 1,024 |
| 21-2020 | Baden-Wuerttemberg     | 0,702 | 0,467 | 1,015 |
| 21-2020 | Bayern                 | 0,484 | 0,31  | 0,72  |
| 21-2020 | Bremen                 | 0,268 | 0,007 | 1,491 |
| 21-2020 | Hessen                 | 0,326 | 0,141 | 0,642 |
| 21-2020 | Hamburg                | 0     | 0     | 0,557 |
| 21-2020 | Mecklenburg-Vorpommern | 0     | 0     | 0,652 |
| 21-2020 | Niedersachsen          | 0,42  | 0,224 | 0,719 |
| 21-2020 | Nordrhein-Westfalen    | 0,243 | 0,139 | 0,395 |
| 21-2020 | Rheinland-Pfalz        | 0     | 0     | 0,256 |
| 21-2020 | Schleswig-Holstein     | 0,195 | 0,024 | 0,704 |
| 21-2020 | Saarland               | 0,288 | 0,007 | 1,607 |
| 21-2020 | Sachsen                | 0,275 | 0,075 | 0,705 |

|         |                        |       |       |       |
|---------|------------------------|-------|-------|-------|
| 21-2020 | Sachsen-Anhalt         | 0,129 | 0,003 | 0,721 |
| 21-2020 | Thuringen              | 0,654 | 0,212 | 1,526 |
| 22-2020 | Brandenburg            | 0,226 | 0,027 | 0,817 |
| 22-2020 | Berlin                 | 0     | 0     | 0,289 |
| 22-2020 | Baden-Wuerttemberg     | 0,252 | 0,121 | 0,464 |
| 22-2020 | Bayern                 | 0,258 | 0,138 | 0,442 |
| 22-2020 | Bremen                 | 0,246 | 0,006 | 1,372 |
| 22-2020 | Hessen                 | 0     | 0     | 0,157 |
| 22-2020 | Hamburg                | 0     | 0     | 0,532 |
| 22-2020 | Mecklenburg-Vorpommern | 0     | 0     | 0,655 |
| 22-2020 | Niedersachsen          | 0,2   | 0,08  | 0,412 |
| 22-2020 | Nordrhein-Westfalen    | 0,224 | 0,126 | 0,37  |
| 22-2020 | Rheinland-Pfalz        | 0,07  | 0,002 | 0,387 |
| 22-2020 | Schleswig-Holstein     | 0,196 | 0,024 | 0,71  |
| 22-2020 | Saarland               | 0,865 | 0,178 | 2,529 |
| 22-2020 | Sachsen                | 0,208 | 0,043 | 0,608 |
| 22-2020 | Sachsen-Anhalt         | 0     | 0     | 0,477 |
| 22-2020 | Thuringen              | 1,184 | 0,541 | 2,247 |
| 23-2020 | Brandenburg            | 0,114 | 0,003 | 0,634 |
| 23-2020 | Berlin                 | 0,235 | 0,049 | 0,687 |
| 23-2020 | Baden-Wuerttemberg     | 0,205 | 0,088 | 0,403 |
| 23-2020 | Bayern                 | 0,231 | 0,115 | 0,413 |
| 23-2020 | Bremen                 | 0,988 | 0,204 | 2,888 |
| 23-2020 | Hessen                 | 0,089 | 0,011 | 0,322 |
| 23-2020 | Hamburg                | 0     | 0     | 0,511 |
| 23-2020 | Mecklenburg-Vorpommern | 0     | 0     | 0,655 |
| 23-2020 | Niedersachsen          | 0,092 | 0,019 | 0,269 |
| 23-2020 | Nordrhein-Westfalen    | 0,134 | 0,061 | 0,255 |
| 23-2020 | Rheinland-Pfalz        | 0,14  | 0,017 | 0,505 |
| 23-2020 | Schleswig-Holstein     | 0     | 0     | 0,364 |
| 23-2020 | Saarland               | 0,288 | 0,007 | 1,607 |
| 23-2020 | Sachsen                | 0,07  | 0,002 | 0,39  |
| 23-2020 | Sachsen-Anhalt         | 0     | 0     | 0,476 |
| 23-2020 | Thuringen              | 0,266 | 0,032 | 0,96  |
| 24-2020 | Brandenburg            | 0,114 | 0,003 | 0,634 |
| 24-2020 | Berlin                 | 0,157 | 0,019 | 0,566 |
| 24-2020 | Baden-Wuerttemberg     | 0,051 | 0,006 | 0,185 |
| 24-2020 | Bayern                 | 0,063 | 0,013 | 0,184 |
| 24-2020 | Bremen                 | 0,634 | 0,077 | 2,29  |
| 24-2020 | Hessen                 | 0,09  | 0,011 | 0,323 |
| 24-2020 | Hamburg                | 0     | 0     | 0,526 |
| 24-2020 | Mecklenburg-Vorpommern | 0     | 0     | 0,653 |
| 24-2020 | Niedersachsen          | 0,196 | 0,072 | 0,427 |
| 24-2020 | Nordrhein-Westfalen    | 0,15  | 0,072 | 0,275 |
| 24-2020 | Rheinland-Pfalz        | 0     | 0     | 0,257 |
| 24-2020 | Schleswig-Holstein     | 0,099 | 0,002 | 0,55  |

|         |                        |       |       |       |
|---------|------------------------|-------|-------|-------|
| 24-2020 | Saarland               | 0     | 0     | 1,064 |
| 24-2020 | Sachsen                | 0     | 0     | 0,258 |
| 24-2020 | Sachsen-Anhalt         | 0,256 | 0,031 | 0,924 |
| 24-2020 | Thuringen              | 0,133 | 0,003 | 0,739 |
| 25-2020 | Brandenburg            | 0     | 0     | 0,413 |
| 25-2020 | Berlin                 | 0,078 | 0,002 | 0,437 |
| 25-2020 | Baden-Wuerttemberg     | 0,077 | 0,016 | 0,224 |
| 25-2020 | Bayern                 | 0,104 | 0,034 | 0,242 |
| 25-2020 | Bremen                 | 1,068 | 0,22  | 3,122 |
| 25-2020 | Hessen                 | 0,131 | 0,027 | 0,384 |
| 25-2020 | Hamburg                | 0     | 0     | 0,499 |
| 25-2020 | Mecklenburg-Vorpommern | 0     | 0     | 0,652 |
| 25-2020 | Niedersachsen          | 0,298 | 0,136 | 0,566 |
| 25-2020 | Nordrhein-Westfalen    | 0,169 | 0,087 | 0,295 |
| 25-2020 | Rheinland-Pfalz        | 0,14  | 0,017 | 0,505 |
| 25-2020 | Schleswig-Holstein     | 0     | 0     | 0,364 |
| 25-2020 | Saarland               | 0     | 0     | 1,064 |
| 25-2020 | Sachsen                | 0     | 0     | 0,254 |
| 25-2020 | Sachsen-Anhalt         | 0     | 0     | 0,471 |
| 25-2020 | Thuringen              | 0     | 0     | 0,491 |
| 26-2020 | Brandenburg            | 0     | 0     | 0,419 |
| 26-2020 | Berlin                 | 0,078 | 0,002 | 0,437 |
| 26-2020 | Baden-Wuerttemberg     | 0,051 | 0,006 | 0,183 |
| 26-2020 | Bayern                 | 0,142 | 0,057 | 0,293 |
| 26-2020 | Bremen                 | 0     | 0     | 1,492 |
| 26-2020 | Hessen                 | 0     | 0     | 0,164 |
| 26-2020 | Hamburg                | 0     | 0     | 0,457 |
| 26-2020 | Mecklenburg-Vorpommern | 0     | 0     | 0,655 |
| 26-2020 | Niedersachsen          | 0,106 | 0,022 | 0,308 |
| 26-2020 | Nordrhein-Westfalen    | 0,096 | 0,038 | 0,197 |
| 26-2020 | Rheinland-Pfalz        | 0     | 0     | 0,258 |
| 26-2020 | Schleswig-Holstein     | 0,099 | 0,002 | 0,55  |
| 26-2020 | Saarland               | 0,288 | 0,007 | 1,607 |
| 26-2020 | Sachsen                | 0     | 0     | 0,257 |
| 26-2020 | Sachsen-Anhalt         | 0     | 0     | 0,477 |
| 26-2020 | Thuringen              | 0,133 | 0,003 | 0,743 |
| 27-2020 | Brandenburg            | 0,113 | 0,003 | 0,632 |
| 27-2020 | Berlin                 | 0,47  | 0,173 | 1,024 |
| 27-2020 | Baden-Wuerttemberg     | 0,102 | 0,028 | 0,261 |
| 27-2020 | Bayern                 | 0,02  | 0     | 0,109 |
| 27-2020 | Bremen                 | 0     | 0     | 1,492 |
| 27-2020 | Hessen                 | 0,045 | 0,001 | 0,248 |
| 27-2020 | Hamburg                | 0,145 | 0,004 | 0,808 |
| 27-2020 | Mecklenburg-Vorpommern | 0     | 0     | 0,655 |
| 27-2020 | Niedersachsen          | 0,142 | 0,039 | 0,363 |
| 27-2020 | Nordrhein-Westfalen    | 0,114 | 0,049 | 0,224 |

|         |                        |       |       |       |
|---------|------------------------|-------|-------|-------|
| 27-2020 | Rheinland-Pfalz        | 0     | 0     | 0,257 |
| 27-2020 | Schleswig-Holstein     | 0     | 0     | 0,362 |
| 27-2020 | Saarland               | 0     | 0     | 1,064 |
| 27-2020 | Sachsen                | 0     | 0     | 0,257 |
| 27-2020 | Sachsen-Anhalt         | 0     | 0     | 0,477 |
| 27-2020 | Thueringen             | 0     | 0     | 0,492 |
| 28-2020 | Brandenburg            | 0     | 0     | 0,42  |
| 28-2020 | Berlin                 | 0,235 | 0,049 | 0,687 |
| 28-2020 | Baden-Wuerttemberg     | 0,051 | 0,006 | 0,183 |
| 28-2020 | Bayern                 | 0,039 | 0,005 | 0,142 |
| 28-2020 | Bremen                 | 0     | 0     | 1,543 |
| 28-2020 | Hessen                 | 0,043 | 0,001 | 0,241 |
| 28-2020 | Hamburg                | 0     | 0     | 0,548 |
| 28-2020 | Mecklenburg-Vorpommern | 0     | 0     | 0,655 |
| 28-2020 | Niedersachsen          | 0,071 | 0,009 | 0,258 |
| 28-2020 | Nordrhein-Westfalen    | 0,172 | 0,089 | 0,301 |
| 28-2020 | Rheinland-Pfalz        | 0,07  | 0,002 | 0,388 |
| 28-2020 | Schleswig-Holstein     | 0,098 | 0,002 | 0,547 |
| 28-2020 | Saarland               | 0     | 0     | 1,064 |
| 28-2020 | Sachsen                | 0     | 0     | 0,257 |
| 28-2020 | Sachsen-Anhalt         | 0     | 0     | 0,477 |
| 28-2020 | Thueringen             | 0,133 | 0,003 | 0,743 |
| 29-2020 | Brandenburg            | 0     | 0     | 0,419 |
| 29-2020 | Berlin                 | 0     | 0     | 0,289 |
| 29-2020 | Baden-Wuerttemberg     | 0,098 | 0,027 | 0,251 |
| 29-2020 | Bayern                 | 0,101 | 0,033 | 0,236 |
| 29-2020 | Bremen                 | 0,818 | 0,099 | 2,955 |
| 29-2020 | Hessen                 | 0,043 | 0,001 | 0,241 |
| 29-2020 | Hamburg                | 0     | 0     | 0,529 |
| 29-2020 | Mecklenburg-Vorpommern | 0     | 0     | 0,655 |
| 29-2020 | Niedersachsen          | 0,071 | 0,009 | 0,257 |
| 29-2020 | Nordrhein-Westfalen    | 0,166 | 0,086 | 0,29  |
| 29-2020 | Rheinland-Pfalz        | 0,139 | 0,017 | 0,501 |
| 29-2020 | Schleswig-Holstein     | 0,197 | 0,024 | 0,712 |
| 29-2020 | Saarland               | 0     | 0     | 1,064 |
| 29-2020 | Sachsen                | 0     | 0     | 0,258 |
| 29-2020 | Sachsen-Anhalt         | 0,129 | 0,003 | 0,719 |
| 29-2020 | Thueringen             | 0     | 0     | 0,492 |
| 30-2020 | Brandenburg            | 0     | 0     | 0,417 |
| 30-2020 | Berlin                 | 0     | 0     | 0,289 |
| 30-2020 | Baden-Wuerttemberg     | 0,198 | 0,086 | 0,391 |
| 30-2020 | Bayern                 | 0,02  | 0,001 | 0,112 |
| 30-2020 | Bremen                 | 0     | 0     | 1,408 |
| 30-2020 | Hessen                 | 0,254 | 0,093 | 0,552 |
| 30-2020 | Hamburg                | 0,101 | 0,003 | 0,561 |
| 30-2020 | Mecklenburg-Vorpommern | 0     | 0     | 0,65  |

|         |                        |       |       |       |
|---------|------------------------|-------|-------|-------|
| 30-2020 | Niedersachsen          | 0,035 | 0,001 | 0,196 |
| 30-2020 | Nordrhein-Westfalen    | 0,158 | 0,082 | 0,276 |
| 30-2020 | Rheinland-Pfalz        | 0,07  | 0,002 | 0,389 |
| 30-2020 | Schleswig-Holstein     | 0,098 | 0,002 | 0,548 |
| 30-2020 | Saarland               | 0     | 0     | 1,064 |
| 30-2020 | Sachsen                | 0     | 0     | 0,256 |
| 30-2020 | Sachsen-Anhalt         | 0,129 | 0,003 | 0,717 |
| 30-2020 | Thuringen              | 0     | 0     | 0,491 |
| 31-2020 | Brandenburg            | 0     | 0     | 0,42  |
| 31-2020 | Berlin                 | 0     | 0     | 0,289 |
| 31-2020 | Baden-Wuerttemberg     | 0     | 0     | 0,09  |
| 31-2020 | Bayern                 | 0,04  | 0,005 | 0,145 |
| 31-2020 | Bremen                 | 0     | 0     | 1,38  |
| 31-2020 | Hessen                 | 0,294 | 0,118 | 0,605 |
| 31-2020 | Hamburg                | 0     | 0     | 0,27  |
| 31-2020 | Mecklenburg-Vorpommern | 0     | 0     | 0,643 |
| 31-2020 | Niedersachsen          | 0,067 | 0,008 | 0,241 |
| 31-2020 | Nordrhein-Westfalen    | 0,216 | 0,126 | 0,346 |
| 31-2020 | Rheinland-Pfalz        | 0     | 0     | 0,257 |
| 31-2020 | Schleswig-Holstein     | 0,191 | 0,023 | 0,691 |
| 31-2020 | Saarland               | 0     | 0     | 1,064 |
| 31-2020 | Sachsen                | 0     | 0     | 0,258 |
| 31-2020 | Sachsen-Anhalt         | 0     | 0     | 0,475 |
| 31-2020 | Thuringen              | 0,267 | 0,032 | 0,963 |
| 32-2020 | Brandenburg            | 0,113 | 0,003 | 0,627 |
| 32-2020 | Berlin                 | 0     | 0     | 0,289 |
| 32-2020 | Baden-Wuerttemberg     | 0,025 | 0,001 | 0,137 |
| 32-2020 | Bayern                 | 0,039 | 0,005 | 0,142 |
| 32-2020 | Bremen                 | 0     | 0     | 1,456 |
| 32-2020 | Hessen                 | 0,039 | 0,001 | 0,215 |
| 32-2020 | Hamburg                | 0,053 | 0,001 | 0,295 |
| 32-2020 | Mecklenburg-Vorpommern | 0     | 0     | 0,649 |
| 32-2020 | Niedersachsen          | 0,034 | 0,001 | 0,188 |
| 32-2020 | Nordrhein-Westfalen    | 0,257 | 0,159 | 0,392 |
| 32-2020 | Rheinland-Pfalz        | 0,069 | 0,002 | 0,383 |
| 32-2020 | Schleswig-Holstein     | 0     | 0     | 0,357 |
| 32-2020 | Saarland               | 0     | 0     | 1,057 |
| 32-2020 | Sachsen                | 0,068 | 0,002 | 0,381 |
| 32-2020 | Sachsen-Anhalt         | 0     | 0     | 0,474 |
| 32-2020 | Thuringen              | 0     | 0     | 0,49  |
| 33-2020 | Brandenburg            | 0     | 0     | 0,419 |
| 33-2020 | Berlin                 | 0     | 0     | 0,289 |
| 33-2020 | Baden-Wuerttemberg     | 0,07  | 0,014 | 0,204 |
| 33-2020 | Bayern                 | 0,017 | 0     | 0,097 |
| 33-2020 | Bremen                 | 0,352 | 0,009 | 1,96  |
| 33-2020 | Hessen                 | 0,073 | 0,009 | 0,264 |

|         |                        |       |       |       |
|---------|------------------------|-------|-------|-------|
| 33-2020 | Hamburg                | 0,067 | 0,002 | 0,374 |
| 33-2020 | Mecklenburg-Vorpommern | 0     | 0     | 0,654 |
| 33-2020 | Niedersachsen          | 0,1   | 0,021 | 0,293 |
| 33-2020 | Nordrhein-Westfalen    | 0,186 | 0,106 | 0,301 |
| 33-2020 | Rheinland-Pfalz        | 0,069 | 0,002 | 0,383 |
| 33-2020 | Schleswig-Holstein     | 0,095 | 0,002 | 0,528 |
| 33-2020 | Saarland               | 0     | 0     | 1,047 |
| 33-2020 | Sachsen                | 0     | 0     | 0,255 |
| 33-2020 | Sachsen-Anhalt         | 0,129 | 0,003 | 0,718 |
| 33-2020 | Thuringen              | 0     | 0     | 0,492 |
| 34-2020 | Brandenburg            | 0     | 0     | 0,415 |
| 34-2020 | Berlin                 | 0,235 | 0,049 | 0,687 |
| 34-2020 | Baden-Wuerttemberg     | 0,041 | 0,005 | 0,148 |
| 34-2020 | Bayern                 | 0,032 | 0,004 | 0,115 |
| 34-2020 | Bremen                 | 0     | 0     | 1,264 |
| 34-2020 | Hessen                 | 0     | 0     | 0,118 |
| 34-2020 | Hamburg                | 0,061 | 0,002 | 0,34  |
| 34-2020 | Mecklenburg-Vorpommern | 0     | 0     | 0,655 |
| 34-2020 | Niedersachsen          | 0,128 | 0,035 | 0,327 |
| 34-2020 | Nordrhein-Westfalen    | 0,172 | 0,094 | 0,289 |
| 34-2020 | Rheinland-Pfalz        | 0,137 | 0,017 | 0,495 |
| 34-2020 | Schleswig-Holstein     | 0     | 0     | 0,356 |
| 34-2020 | Saarland               | 0,282 | 0,007 | 1,571 |
| 34-2020 | Sachsen                | 0     | 0     | 0,252 |
| 34-2020 | Sachsen-Anhalt         | 0     | 0     | 0,475 |
| 34-2020 | Thuringen              | 0     | 0     | 0,492 |
| 35-2020 | Brandenburg            | 0     | 0     | 0,417 |
| 35-2020 | Berlin                 | 0     | 0     | 0,289 |
| 35-2020 | Baden-Wuerttemberg     | 0,039 | 0,005 | 0,141 |
| 35-2020 | Bayern                 | 0,091 | 0,033 | 0,198 |
| 35-2020 | Bremen                 | 0     | 0     | 1,061 |
| 35-2020 | Hessen                 | 0     | 0     | 0,125 |
| 35-2020 | Hamburg                | 0     | 0     | 0,211 |
| 35-2020 | Mecklenburg-Vorpommern | 0     | 0     | 0,654 |
| 35-2020 | Niedersachsen          | 0,092 | 0,019 | 0,27  |
| 35-2020 | Nordrhein-Westfalen    | 0,065 | 0,021 | 0,152 |
| 35-2020 | Rheinland-Pfalz        | 0,068 | 0,002 | 0,38  |
| 35-2020 | Schleswig-Holstein     | 0     | 0     | 0,359 |
| 35-2020 | Saarland               | 0     | 0     | 1,034 |
| 35-2020 | Sachsen                | 0     | 0     | 0,252 |
| 35-2020 | Sachsen-Anhalt         | 0,129 | 0,003 | 0,718 |
| 35-2020 | Thuringen              | 0,133 | 0,003 | 0,742 |
| 36-2020 | Brandenburg            | 0     | 0     | 0,418 |
| 36-2020 | Berlin                 | 0,078 | 0,002 | 0,437 |
| 36-2020 | Baden-Wuerttemberg     | 0,059 | 0,012 | 0,173 |
| 36-2020 | Bayern                 | 0,03  | 0,004 | 0,108 |

|         |                        |       |       |       |
|---------|------------------------|-------|-------|-------|
| 36-2020 | Bremen                 | 0     | 0     | 1,006 |
| 36-2020 | Hessen                 | 0,246 | 0,099 | 0,507 |
| 36-2020 | Hamburg                | 0,09  | 0,011 | 0,327 |
| 36-2020 | Mecklenburg-Vorpommern | 0     | 0     | 0,652 |
| 36-2020 | Niedersachsen          | 0,031 | 0,001 | 0,174 |
| 36-2020 | Nordrhein-Westfalen    | 0,176 | 0,096 | 0,295 |
| 36-2020 | Rheinland-Pfalz        | 0,272 | 0,074 | 0,697 |
| 36-2020 | Schleswig-Holstein     | 0     | 0     | 0,357 |
| 36-2020 | Saarland               | 0     | 0     | 1,057 |
| 36-2020 | Sachsen                | 0     | 0     | 0,24  |
| 36-2020 | Sachsen-Anhalt         | 0     | 0     | 0,476 |
| 36-2020 | Thueringen             | 0,133 | 0,003 | 0,739 |
| 37-2020 | Brandenburg            | 0,113 | 0,003 | 0,629 |
| 37-2020 | Berlin                 | 0     | 0     | 0,289 |
| 37-2020 | Baden-Wuerttemberg     | 0,14  | 0,056 | 0,288 |
| 37-2020 | Bayern                 | 0,201 | 0,11  | 0,338 |
| 37-2020 | Bremen                 | 0     | 0     | 1,108 |
| 37-2020 | Hessen                 | 0,287 | 0,124 | 0,565 |
| 37-2020 | Hamburg                | 0,043 | 0,001 | 0,238 |
| 37-2020 | Mecklenburg-Vorpommern | 0     | 0     | 0,651 |
| 37-2020 | Niedersachsen          | 0,255 | 0,116 | 0,483 |
| 37-2020 | Nordrhein-Westfalen    | 0,191 | 0,109 | 0,31  |
| 37-2020 | Rheinland-Pfalz        | 0,068 | 0,002 | 0,376 |
| 37-2020 | Schleswig-Holstein     | 0     | 0     | 0,357 |
| 37-2020 | Saarland               | 0,288 | 0,007 | 1,607 |
| 37-2020 | Sachsen                | 0     | 0     | 0,231 |
| 37-2020 | Sachsen-Anhalt         | 0,127 | 0,003 | 0,709 |
| 37-2020 | Thueringen             | 0,132 | 0,003 | 0,735 |
| 38-2020 | Brandenburg            | 0     | 0     | 0,414 |
| 38-2020 | Berlin                 | 0     | 0     | 0,289 |
| 38-2020 | Baden-Wuerttemberg     | 0,133 | 0,053 | 0,274 |
| 38-2020 | Bayern                 | 0,186 | 0,102 | 0,312 |
| 38-2020 | Bremen                 | 0     | 0     | 1,06  |
| 38-2020 | Hessen                 | 0,175 | 0,057 | 0,408 |
| 38-2020 | Hamburg                | 0,036 | 0,001 | 0,203 |
| 38-2020 | Mecklenburg-Vorpommern | 0     | 0     | 0,643 |
| 38-2020 | Niedersachsen          | 0,241 | 0,11  | 0,458 |
| 38-2020 | Nordrhein-Westfalen    | 0,211 | 0,129 | 0,326 |
| 38-2020 | Rheinland-Pfalz        | 0,271 | 0,074 | 0,693 |
| 38-2020 | Schleswig-Holstein     | 0     | 0     | 0,344 |
| 38-2020 | Saarland               | 0     | 0     | 1,052 |
| 38-2020 | Sachsen                | 0,862 | 0,471 | 1,446 |
| 38-2020 | Sachsen-Anhalt         | 0,127 | 0,003 | 0,708 |
| 38-2020 | Thueringen             | 0,129 | 0,003 | 0,718 |
| 39-2020 | Brandenburg            | 0,11  | 0,003 | 0,615 |
| 39-2020 | Berlin                 | 0,235 | 0,049 | 0,687 |

|         |                        |       |       |       |
|---------|------------------------|-------|-------|-------|
| 39-2020 | Baden-Wuerttemberg     | 0,305 | 0,174 | 0,496 |
| 39-2020 | Bayern                 | 0,254 | 0,148 | 0,406 |
| 39-2020 | Bremen                 | 0     | 0     | 0,718 |
| 39-2020 | Hessen                 | 0,328 | 0,157 | 0,604 |
| 39-2020 | Hamburg                | 0,067 | 0,008 | 0,242 |
| 39-2020 | Mecklenburg-Vorpommern | 0     | 0     | 0,651 |
| 39-2020 | Niedersachsen          | 0,388 | 0,212 | 0,651 |
| 39-2020 | Nordrhein-Westfalen    | 0,233 | 0,149 | 0,346 |
| 39-2020 | Rheinland-Pfalz        | 0,265 | 0,072 | 0,678 |
| 39-2020 | Schleswig-Holstein     | 0,185 | 0,022 | 0,667 |
| 39-2020 | Saarland               | 0,282 | 0,007 | 1,573 |
| 39-2020 | Sachsen                | 0,471 | 0,203 | 0,928 |
| 39-2020 | Sachsen-Anhalt         | 0,124 | 0,003 | 0,693 |
| 39-2020 | Thueringen             | 0,264 | 0,032 | 0,952 |
| 40-2020 | Brandenburg            | 0,215 | 0,026 | 0,778 |
| 40-2020 | Berlin                 | 0,549 | 0,221 | 1,131 |
| 40-2020 | Baden-Wuerttemberg     | 0,367 | 0,227 | 0,562 |
| 40-2020 | Bayern                 | 0,222 | 0,124 | 0,366 |
| 40-2020 | Bremen                 | 0,329 | 0,04  | 1,188 |
| 40-2020 | Hessen                 | 0,297 | 0,142 | 0,546 |
| 40-2020 | Hamburg                | 0,258 | 0,111 | 0,508 |
| 40-2020 | Mecklenburg-Vorpommern | 0     | 0     | 0,621 |
| 40-2020 | Niedersachsen          | 0,179 | 0,072 | 0,37  |
| 40-2020 | Nordrhein-Westfalen    | 0,267 | 0,176 | 0,389 |
| 40-2020 | Rheinland-Pfalz        | 0,129 | 0,016 | 0,467 |
| 40-2020 | Schleswig-Holstein     | 0,093 | 0,002 | 0,516 |
| 40-2020 | Saarland               | 0     | 0     | 1     |
| 40-2020 | Sachsen                | 0,569 | 0,273 | 1,047 |
| 40-2020 | Sachsen-Anhalt         | 0     | 0     | 0,463 |
| 40-2020 | Thueringen             | 0,131 | 0,003 | 0,729 |
| 41-2020 | Brandenburg            | 0,69  | 0,277 | 1,421 |
| 41-2020 | Berlin                 | 0,47  | 0,173 | 1,024 |
| 41-2020 | Baden-Wuerttemberg     | 0,564 | 0,403 | 0,769 |
| 41-2020 | Bayern                 | 0,453 | 0,313 | 0,632 |
| 41-2020 | Bremen                 | 0,352 | 0,073 | 1,03  |
| 41-2020 | Hessen                 | 0,426 | 0,252 | 0,673 |
| 41-2020 | Hamburg                | 0,096 | 0,02  | 0,282 |
| 41-2020 | Mecklenburg-Vorpommern | 0     | 0     | 0,598 |
| 41-2020 | Niedersachsen          | 0,465 | 0,284 | 0,719 |
| 41-2020 | Nordrhein-Westfalen    | 0,49  | 0,375 | 0,629 |
| 41-2020 | Rheinland-Pfalz        | 0,845 | 0,462 | 1,418 |
| 41-2020 | Schleswig-Holstein     | 0     | 0     | 0,338 |
| 41-2020 | Saarland               | 0     | 0     | 0,944 |
| 41-2020 | Sachsen                | 0,608 | 0,332 | 1,02  |
| 41-2020 | Sachsen-Anhalt         | 0,123 | 0,003 | 0,687 |
| 41-2020 | Thueringen             | 0,518 | 0,141 | 1,325 |

|         |                        |       |       |       |
|---------|------------------------|-------|-------|-------|
| 42-2020 | Brandenburg            | 1,254 | 0,685 | 2,103 |
| 42-2020 | Berlin                 | 0,627 | 0,271 | 1,236 |
| 42-2020 | Baden-Wuerttemberg     | 0,844 | 0,656 | 1,071 |
| 42-2020 | Bayern                 | 0,596 | 0,444 | 0,784 |
| 42-2020 | Bremen                 | 0,345 | 0,071 | 1,009 |
| 42-2020 | Hessen                 | 0,889 | 0,657 | 1,175 |
| 42-2020 | Hamburg                | 0,241 | 0,11  | 0,457 |
| 42-2020 | Mecklenburg-Vorpommern | 0,148 | 0,004 | 0,822 |
| 42-2020 | Niedersachsen          | 0,556 | 0,367 | 0,81  |
| 42-2020 | Nordrhein-Westfalen    | 0,698 | 0,571 | 0,845 |
| 42-2020 | Rheinland-Pfalz        | 0,739 | 0,393 | 1,264 |
| 42-2020 | Schleswig-Holstein     | 0,751 | 0,343 | 1,425 |
| 42-2020 | Saarland               | 0,808 | 0,22  | 2,068 |
| 42-2020 | Sachsen                | 2,007 | 1,507 | 2,618 |
| 42-2020 | Sachsen-Anhalt         | 0,228 | 0,028 | 0,823 |
| 42-2020 | Thueringen             | 0,478 | 0,13  | 1,225 |
| 43-2020 | Brandenburg            | 1,156 | 0,661 | 1,877 |
| 43-2020 | Berlin                 | 2,901 | 2,042 | 3,998 |
| 43-2020 | Baden-Wuerttemberg     | 1,057 | 0,866 | 1,277 |
| 43-2020 | Bayern                 | 0,725 | 0,569 | 0,911 |
| 43-2020 | Bremen                 | 1,135 | 0,587 | 1,983 |
| 43-2020 | Hessen                 | 1,346 | 1,094 | 1,639 |
| 43-2020 | Hamburg                | 0,272 | 0,141 | 0,476 |
| 43-2020 | Mecklenburg-Vorpommern | 0,659 | 0,214 | 1,539 |
| 43-2020 | Niedersachsen          | 1,151 | 0,894 | 1,46  |
| 43-2020 | Nordrhein-Westfalen    | 1,104 | 0,965 | 1,258 |
| 43-2020 | Rheinland-Pfalz        | 1,388 | 0,922 | 2,006 |
| 43-2020 | Schleswig-Holstein     | 1,236 | 0,755 | 1,909 |
| 43-2020 | Saarland               | 2,929 | 1,674 | 4,757 |
| 43-2020 | Sachsen                | 2,905 | 2,383 | 3,508 |
| 43-2020 | Sachsen-Anhalt         | 1,435 | 0,803 | 2,368 |
| 43-2020 | Thueringen             | 1,665 | 0,952 | 2,704 |
| 44-2020 | Brandenburg            | 1,225 | 0,767 | 1,854 |
| 44-2020 | Berlin                 | 4,547 | 3,453 | 5,878 |
| 44-2020 | Baden-Wuerttemberg     | 1,22  | 1,034 | 1,429 |
| 44-2020 | Bayern                 | 1,796 | 1,565 | 2,051 |
| 44-2020 | Bremen                 | 1,632 | 0,892 | 2,738 |
| 44-2020 | Hessen                 | 1,404 | 1,163 | 1,68  |
| 44-2020 | Hamburg                | 0,357 | 0,2   | 0,589 |
| 44-2020 | Mecklenburg-Vorpommern | 0,802 | 0,322 | 1,652 |
| 44-2020 | Niedersachsen          | 1,367 | 1,116 | 1,658 |
| 44-2020 | Nordrhein-Westfalen    | 1,33  | 1,188 | 1,483 |
| 44-2020 | Rheinland-Pfalz        | 1,664 | 1,184 | 2,275 |
| 44-2020 | Schleswig-Holstein     | 1,381 | 0,925 | 1,983 |
| 44-2020 | Saarland               | 3,227 | 1,971 | 4,983 |
| 44-2020 | Sachsen                | 3,218 | 2,74  | 3,756 |

|         |                        |       |       |       |
|---------|------------------------|-------|-------|-------|
| 44-2020 | Sachsen-Anhalt         | 1,008 | 0,537 | 1,724 |
| 44-2020 | Thuringen              | 1,933 | 1,196 | 2,954 |
| 45-2020 | Brandenburg            | 1,643 | 1,116 | 2,331 |
| 45-2020 | Berlin                 | 5,488 | 4,278 | 6,934 |
| 45-2020 | Baden-Wuerttemberg     | 1,073 | 0,91  | 1,257 |
| 45-2020 | Bayern                 | 2,173 | 1,926 | 2,442 |
| 45-2020 | Bremen                 | 1,418 | 0,794 | 2,339 |
| 45-2020 | Hessen                 | 1,631 | 1,369 | 1,93  |
| 45-2020 | Hamburg                | 0,559 | 0,365 | 0,82  |
| 45-2020 | Mecklenburg-Vorpommern | 1,122 | 0,538 | 2,063 |
| 45-2020 | Niedersachsen          | 0,96  | 0,759 | 1,198 |
| 45-2020 | Nordrhein-Westfalen    | 1,258 | 1,124 | 1,403 |
| 45-2020 | Rheinland-Pfalz        | 2,497 | 1,891 | 3,235 |
| 45-2020 | Schleswig-Holstein     | 0,999 | 0,601 | 1,56  |
| 45-2020 | Saarland               | 2,53  | 1,416 | 4,173 |
| 45-2020 | Sachsen                | 3,459 | 2,978 | 3,997 |
| 45-2020 | Sachsen-Anhalt         | 1,484 | 0,894 | 2,318 |
| 45-2020 | Thuringen              | 3,025 | 2,119 | 4,188 |
| 46-2020 | Brandenburg            | 1,953 | 1,396 | 2,66  |
| 46-2020 | Berlin                 | 6,978 | 5,604 | 8,587 |
| 46-2020 | Baden-Wuerttemberg     | 1,53  | 1,333 | 1,748 |
| 46-2020 | Bayern                 | 2,374 | 2,117 | 2,654 |
| 46-2020 | Bremen                 | 1,029 | 0,532 | 1,798 |
| 46-2020 | Hessen                 | 2,115 | 1,818 | 2,447 |
| 46-2020 | Hamburg                | 0,842 | 0,602 | 1,147 |
| 46-2020 | Mecklenburg-Vorpommern | 1,766 | 1,009 | 2,868 |
| 46-2020 | Niedersachsen          | 1,176 | 0,958 | 1,429 |
| 46-2020 | Nordrhein-Westfalen    | 1,476 | 1,331 | 1,632 |
| 46-2020 | Rheinland-Pfalz        | 4,019 | 3,244 | 4,924 |
| 46-2020 | Schleswig-Holstein     | 0,484 | 0,232 | 0,89  |
| 46-2020 | Saarland               | 3,012 | 1,813 | 4,703 |
| 46-2020 | Sachsen                | 3,232 | 2,791 | 3,723 |
| 46-2020 | Sachsen-Anhalt         | 1,687 | 1,057 | 2,554 |
| 46-2020 | Thuringen              | 4,048 | 3,014 | 5,322 |
| 47-2020 | Brandenburg            | 2,135 | 1,599 | 2,792 |
| 47-2020 | Berlin                 | 6,194 | 4,904 | 7,719 |
| 47-2020 | Baden-Wuerttemberg     | 1,484 | 1,298 | 1,689 |
| 47-2020 | Bayern                 | 3,414 | 3,078 | 3,776 |
| 47-2020 | Bremen                 | 1,375 | 0,786 | 2,233 |
| 47-2020 | Hessen                 | 2,086 | 1,795 | 2,41  |
| 47-2020 | Hamburg                | 0,573 | 0,387 | 0,818 |
| 47-2020 | Mecklenburg-Vorpommern | 0,601 | 0,22  | 1,307 |
| 47-2020 | Niedersachsen          | 1,219 | 1,006 | 1,464 |
| 47-2020 | Nordrhein-Westfalen    | 1,509 | 1,361 | 1,669 |
| 47-2020 | Rheinland-Pfalz        | 3,73  | 2,983 | 4,606 |
| 47-2020 | Schleswig-Holstein     | 0,32  | 0,117 | 0,696 |

|         |                        |       |       |       |
|---------|------------------------|-------|-------|-------|
| 47-2020 | Saarland               | 2,76  | 1,578 | 4,482 |
| 47-2020 | Sachsen                | 3,365 | 2,923 | 3,855 |
| 47-2020 | Sachsen-Anhalt         | 2,405 | 1,675 | 3,344 |
| 47-2020 | Thueringen             | 4,269 | 3,28  | 5,462 |
| 48-2020 | Brandenburg            | 1,914 | 1,406 | 2,545 |
| 48-2020 | Berlin                 | 7,683 | 6,238 | 9,363 |
| 48-2020 | Baden-Wuerttemberg     | 1,325 | 1,134 | 1,538 |
| 48-2020 | Bayern                 | 3,092 | 2,758 | 3,455 |
| 48-2020 | Bremen                 | 0,433 | 0,118 | 1,109 |
| 48-2020 | Hessen                 | 1,862 | 1,568 | 2,195 |
| 48-2020 | Hamburg                | 0,201 | 0,087 | 0,396 |
| 48-2020 | Mecklenburg-Vorpommern | 1,346 | 0,717 | 2,301 |
| 48-2020 | Niedersachsen          | 0,658 | 0,497 | 0,855 |
| 48-2020 | Nordrhein-Westfalen    | 1,101 | 0,971 | 1,243 |
| 48-2020 | Rheinland-Pfalz        | 3,915 | 3,123 | 4,847 |
| 48-2020 | Schleswig-Holstein     | 0,334 | 0,122 | 0,726 |
| 48-2020 | Saarland               | 3,051 | 1,744 | 4,955 |
| 48-2020 | Sachsen                | 1,713 | 1,425 | 2,042 |
| 48-2020 | Sachsen-Anhalt         | 1,758 | 1,168 | 2,541 |
| 48-2020 | Thueringen             | 2,476 | 1,744 | 3,413 |
| 49-2020 | Brandenburg            | 1,289 | 0,863 | 1,851 |
| 49-2020 | Berlin                 | 3,371 | 2,44  | 4,541 |
| 49-2020 | Baden-Wuerttemberg     | 0,732 | 0,588 | 0,901 |
| 49-2020 | Bayern                 | 1,61  | 1,348 | 1,908 |
| 49-2020 | Bremen                 | 0,248 | 0,03  | 0,895 |
| 49-2020 | Hessen                 | 1,015 | 0,781 | 1,296 |
| 49-2020 | Hamburg                | 0,269 | 0,123 | 0,51  |
| 49-2020 | Mecklenburg-Vorpommern | 0,819 | 0,354 | 1,613 |
| 49-2020 | Niedersachsen          | 0,278 | 0,168 | 0,435 |
| 49-2020 | Nordrhein-Westfalen    | 0,683 | 0,57  | 0,811 |
| 49-2020 | Rheinland-Pfalz        | 2,052 | 1,491 | 2,755 |
| 49-2020 | Schleswig-Holstein     | 0,484 | 0,209 | 0,953 |
| 49-2020 | Saarland               | 0,362 | 0,044 | 1,306 |
| 49-2020 | Sachsen                | 1,171 | 0,91  | 1,485 |
| 49-2020 | Sachsen-Anhalt         | 1,292 | 0,8   | 1,975 |
| 49-2020 | Thueringen             | 2,001 | 1,369 | 2,825 |
| 50-2020 | Brandenburg            | 0,53  | 0,064 | 1,916 |
| 50-2020 | Berlin                 | 1,098 | 0,299 | 2,81  |
| 50-2020 | Baden-Wuerttemberg     | 0,331 | 0,143 | 0,652 |
| 50-2020 | Bayern                 | 0,722 | 0,395 | 1,211 |
| 50-2020 | Bremen                 | 0     | 0     | 3,999 |
| 50-2020 | Hessen                 | 0,53  | 0,213 | 1,092 |
| 50-2020 | Hamburg                | 0     | 0     | 1,117 |
| 50-2020 | Mecklenburg-Vorpommern | 0     | 0     | 1,262 |
| 50-2020 | Niedersachsen          | 0     | 0     | 0,296 |
| 50-2020 | Nordrhein-Westfalen    | 0,523 | 0,335 | 0,779 |

|         |                    |       |       |       |
|---------|--------------------|-------|-------|-------|
| 50-2020 | Rheinland-Pfalz    | 2,051 | 1,024 | 3,669 |
| 50-2020 | Schleswig-Holstein | 0     | 0     | 0,883 |
| 50-2020 | Saarland           | 0     | 0     | 2,547 |
| 50-2020 | Sachsen            | 0,531 | 0,195 | 1,155 |
| 50-2020 | Sachsen-Anhalt     | 0,721 | 0,149 | 2,108 |
| 50-2020 | Thuringen          | 0,931 | 0,254 | 2,385 |
