# Supplementary material
Source: PubMed Central journal article supplement (PMC8139365)
Supplement: mmc6.pdf [file mmc6.pdf]

## District-specific risk ratios and exceedance probability

Table 1 shows the district-specific risk ratios (RR) with corresponding 95% credibility intervals (95%-CrI), and the posterior probability of exceeding an RR threshold greater than 1, 2 or 3, respectively. A posterior probability of equal to or greater than 80% determines a high certainty of exceeding one of the mentioned RR thresholds.

**Table 1: District-specific adjusted relative risk and exceedance probability**

| District                 | District ID | RR (95%-CrI)     | Exceedance probability RR > 1 | Exceedance probability RR > 2 | Exceedance probability RR > 3 |
|--------------------------|-------------|------------------|-------------------------------|-------------------------------|-------------------------------|
| SK Flensburg             | 1           | 0.28 (0.16-0.46) | 0 %                           | 0 %                           | 0 %                           |
| SK Kiel                  | 2           | 0.31 (0.19-0.48) | 0 %                           | 0 %                           | 0 %                           |
| SK Lübeck                | 3           | 0.25 (0.16-0.37) | 0 %                           | 0 %                           | 0 %                           |
| SK Neumünster            | 4           | 0.58 (0.35-0.88) | 0.67 %                        | 0 %                           | 0 %                           |
| LK Dithmarschen          | 5           | 0.42 (0.26-0.62) | 0 %                           | 0 %                           | 0 %                           |
| LK Herzogtum Lauenburg   | 6           | 0.3 (0.2-0.42)   | 0 %                           | 0 %                           | 0 %                           |
| LK Nordfriesland         | 7           | 0.19 (0.11-0.29) | 0 %                           | 0 %                           | 0 %                           |
| LK Ostholstein           | 8           | 0.15 (0.1-0.23)  | 0 %                           | 0 %                           | 0 %                           |
| LK Pinneberg             | 9           | 0.44 (0.28-0.66) | 0.01 %                        | 0 %                           | 0 %                           |
| LK Plön                  | 10          | 0.19 (0.12-0.29) | 0 %                           | 0 %                           | 0 %                           |
| LK Rendsburg-Eckernförde | 11          | 0.21 (0.14-0.31) | 0 %                           | 0 %                           | 0 %                           |
| LK Schleswig-Flensburg   | 12          | 0.15 (0.09-0.22) | 0 %                           | 0 %                           | 0 %                           |
| LK Segeberg              | 13          | 0.39 (0.27-0.55) | 0 %                           | 0 %                           | 0 %                           |
| LK Steinburg             | 14          | 0.31 (0.2-0.47)  | 0 %                           | 0 %                           | 0 %                           |
| LK Stormarn              | 15          | 0.44 (0.29-0.63) | 0 %                           | 0 %                           | 0 %                           |
| SK Hamburg               | 16          | 0.28 (0.19-0.4)  | 0 %                           | 0 %                           | 0 %                           |
| SK Braunschweig          | 17          | 0.4 (0.27-0.58)  | 0 %                           | 0 %                           | 0 %                           |
| SK Salzgitter            | 18          | 0.8 (0.52-1.16)  | 11.15 %                       | 0 %                           | 0 %                           |
| SK Wolfsburg             | 19          | 0.8 (0.49-1.23)  | 14.09 %                       | 0 %                           | 0 %                           |
| LK Gifhorn               | 20          | 0.37 (0.25-0.51) | 0 %                           | 0 %                           | 0 %                           |
| LK Goslar                | 21          | 0.46 (0.3-0.65)  | 0 %                           | 0 %                           | 0 %                           |
| LK Helmstedt             | 22          | 0.41 (0.27-0.6)  | 0 %                           | 0 %                           | 0 %                           |
| LK Northeim              | 23          | 0.41 (0.27-0.6)  | 0 %                           | 0 %                           | 0 %                           |
| LK Peine                 | 24          | 0.61 (0.4-0.9)   | 0.65 %                        | 0 %                           | 0 %                           |
| LK Wolfenbüttel          | 25          | 0.45 (0.3-0.65)  | 0 %                           | 0 %                           | 0 %                           |
| LK Göttingen             | 26          | 1.28 (0.88-1.8)  | 89.62 %                       | 0.6 %                         | 0 %                           |
| Region Hannover          | 27          | 0.5 (0.35-0.69)  | 0 %                           | 0 %                           | 0 %                           |
| LK Diepholz              | 28          | 1.26 (0.87-1.75) | 88.11 %                       | 0.36 %                        | 0 %                           |
| LK Hameln-Pyrmont        | 29          | 0.47 (0.31-0.69) | 0.01 %                        | 0 %                           | 0 %                           |
| LK Hildesheim            | 30          | 0.53 (0.37-0.74) | 0.01 %                        | 0 %                           | 0 %                           |
| LK Holz Minden           | 31          | 0.43 (0.27-0.65) | 0 %                           | 0 %                           | 0 %                           |
| LK Nienburg (Weser)      | 32          | 0.42 (0.27-0.61) | 0 %                           | 0 %                           | 0 %                           |
| LK Schaumburg            | 33          | 0.58 (0.38-0.85) | 0.28 %                        | 0 %                           | 0 %                           |
| LK Celle                 | 34          | 0.4 (0.26-0.59)  | 0 %                           | 0 %                           | 0 %                           |
| LK Cuxhaven              | 35          | 0.74 (0.48-1.07) | 5.38 %                        | 0 %                           | 0 %                           |
| LK Harburg               | 36          | 0.79 (0.54-1.12) | 8.86 %                        | 0 %                           | 0 %                           |
| LK Lüchow-Dannenberg     | 37          | 0.27 (0.17-0.41) | 0 %                           | 0 %                           | 0 %                           |
| LK Lüneburg              | 38          | 0.23 (0.15-0.33) | 0 %                           | 0 %                           | 0 %                           |

|                        |    |                  |         |         |         |
|------------------------|----|------------------|---------|---------|---------|
| LK Osterholz           | 39 | 0.66 (0.43-0.97) | 1.83 %  | 0 %     | 0 %     |
| LK Rotenburg (Wümme)   | 40 | 0.57 (0.38-0.82) | 0.16 %  | 0 %     | 0 %     |
| LK Heidekreis          | 41 | 0.29 (0.2-0.42)  | 0 %     | 0 %     | 0 %     |
| LK Stade               | 42 | 0.39 (0.25-0.58) | 0 %     | 0 %     | 0 %     |
| LK Uelzen              | 43 | 0.24 (0.15-0.36) | 0 %     | 0 %     | 0 %     |
| LK Verden              | 44 | 1.04 (0.69-1.49) | 53.35 % | 0.03 %  | 0 %     |
| SK Delmenhorst         | 45 | 2.87 (1.86-4.21) | 100 %   | 94.72 % | 37.23 % |
| SK Emden               | 46 | 0.47 (0.28-0.76) | 0.13 %  | 0 %     | 0 %     |
| SK Oldenburg           | 47 | 0.49 (0.31-0.74) | 0.05 %  | 0 %     | 0 %     |
| SK Osnabrück           | 48 | 1.26 (0.78-1.91) | 81.06 % | 1.6 %   | 0 %     |
| SK Wilhelmshaven       | 49 | 0.27 (0.15-0.44) | 0 %     | 0 %     | 0 %     |
| LK Ammerland           | 50 | 0.53 (0.35-0.77) | 0.06 %  | 0 %     | 0 %     |
| LK Aurich              | 51 | 0.33 (0.21-0.51) | 0 %     | 0 %     | 0 %     |
| LK Cloppenburg         | 52 | 1.78 (1.21-2.52) | 99.85 % | 23.69 % | 0.2 %   |
| LK Emsland             | 53 | 0.68 (0.46-0.99) | 2.12 %  | 0 %     | 0 %     |
| LK Friesland           | 54 | 0.34 (0.22-0.51) | 0 %     | 0 %     | 0 %     |
| LK Grafschaft Bentheim | 55 | 1.18 (0.75-1.76) | 73.53 % | 0.54 %  | 0 %     |
| LK Leer                | 56 | 0.46 (0.31-0.66) | 0 %     | 0 %     | 0 %     |
| LK Oldenburg           | 57 | 1.74 (1.18-2.47) | 99.78 % | 20.17 % | 0.14 %  |
| LK Osnabrück           | 58 | 1.03 (0.73-1.41) | 53.21 % | 0 %     | 0 %     |
| LK Vechta              | 59 | 4.58 (3.03-6.64) | 100 %   | 100 %   | 97.74 % |
| LK Wesermarsch         | 60 | 0.84 (0.57-1.19) | 14.83 % | 0 %     | 0 %     |
| LK Wittmund            | 61 | 0.44 (0.27-0.69) | 0.03 %  | 0 %     | 0 %     |
| SK Bremen              | 62 | 1.08 (0.74-1.52) | 62.19 % | 0.03 %  | 0 %     |
| SK Bremerhaven         | 63 | 1.14 (0.71-1.74) | 67.96 % | 0.5 %   | 0 %     |
| SK Düsseldorf          | 64 | 4.61 (3.02-6.73) | 100 %   | 100 %   | 97.67 % |
| SK Duisburg            | 65 | 2.41 (1.68-3.36) | 100 %   | 83.37 % | 9.32 %  |
| SK Essen               | 66 | 0.88 (0.62-1.22) | 20.83 % | 0 %     | 0 %     |
| SK Krefeld             | 67 | 2.88 (1.91-4.16) | 100 %   | 95.71 % | 37.62 % |
| SK Mönchengladbach     | 68 | 1.78 (1.14-2.64) | 99.51 % | 25.65 % | 0.55 %  |
| SK Mülheim a.d.Ruhr    | 69 | 1.78 (1.16-2.6)  | 99.63 % | 24.97 % | 0.42 %  |
| SK Oberhausen          | 70 | 1.23 (0.82-1.79) | 82.98 % | 0.6 %   | 0 %     |
| SK Remscheid           | 71 | 2.35 (1.53-3.44) | 100 %   | 74.68 % | 9.85 %  |
| SK Solingen            | 72 | 1.9 (1.24-2.78)  | 99.86 % | 35.85 % | 1.02 %  |
| SK Wuppertal           | 73 | 1.54 (1.03-2.2)  | 98.31 % | 7.1 %   | 0.02 %  |
| LK Kleve               | 74 | 1.91 (1.24-2.82) | 99.85 % | 37.4 %  | 1.26 %  |
| LK Mettmann            | 75 | 1.4 (1.01-1.89)  | 97.65 % | 1.04 %  | 0 %     |
| LK Rhein-Kreis Neuss   | 76 | 1.39 (0.99-1.89) | 97.08 % | 1.12 %  | 0 %     |
| LK Viersen             | 77 | 1.98 (1.36-2.8)  | 99.98 % | 44.32 % | 1.01 %  |
| LK Wesel               | 78 | 1.39 (0.97-1.92) | 96.43 % | 1.49 %  | 0 %     |
| SK Bonn                | 79 | 1.14 (0.72-1.73) | 68.25 % | 0.47 %  | 0 %     |
| SK Köln                | 80 | 1.89 (1.31-2.63) | 99.97 % | 33.81 % | 0.37 %  |
| SK Leverkusen          | 81 | 1.79 (1.15-2.66) | 99.5 %  | 26.22 % | 0.59 %  |
| StadtRegion Aachen     | 82 | 0.79 (0.51-1.16) | 10.85 % | 0 %     | 0 %     |
| LK Düren               | 83 | 1.3 (0.87-1.86)  | 88.84 % | 1.05 %  | 0 %     |
| LK Rhein-Erft-Kreis    | 84 | 0.8 (0.54-1.15)  | 10.89 % | 0 %     | 0 %     |

|                               |     |                  |         |         |         |
|-------------------------------|-----|------------------|---------|---------|---------|
| LK Euskirchen                 | 85  | 1.43 (0.98-2.02) | 96.6 %  | 2.84 %  | 0 %     |
| LK Heinsberg                  | 86  | 2.85 (1.9-4.1)   | 100 %   | 95.54 % | 35.86 % |
| LK Oberbergischer Kreis       | 87  | 0.96 (0.67-1.33) | 36.28 % | 0 %     | 0 %     |
| LK Rheinisch-Bergischer Kreis | 88  | 1.09 (0.75-1.53) | 64.26 % | 0.03 %  | 0 %     |
| LK Rhein-Sieg-Kreis           | 89  | 1.46 (1.04-1.99) | 98.5 %  | 2.36 %  | 0 %     |
| SK Bottrop                    | 90  | 1.75 (1.14-2.58) | 99.49 % | 23.09 % | 0.38 %  |
| SK Gelsenkirchen              | 91  | 1.97 (1.3-2.87)  | 99.94 % | 43.03 % | 1.49 %  |
| SK Münster                    | 92  | 0.74 (0.47-1.1)  | 6.29 %  | 0 %     | 0 %     |
| LK Borken                     | 93  | 0.86 (0.59-1.22) | 18.89 % | 0 %     | 0 %     |
| LK Coesfeld                   | 94  | 1.09 (0.75-1.54) | 64.83 % | 0.04 %  | 0 %     |
| LK Recklinghausen             | 95  | 1.01 (0.72-1.38) | 49.15 % | 0 %     | 0 %     |
| LK Steinfurt                  | 96  | 0.75 (0.53-1.05) | 4.44 %  | 0 %     | 0 %     |
| LK Warendorf                  | 97  | 1.99 (1.38-2.79) | 99.99 % | 45.45 % | 0.91 %  |
| SK Bielefeld                  | 98  | 1.82 (1.18-2.68) | 99.71 % | 29.16 % | 0.66 %  |
| LK Gütersloh                  | 99  | 3.74 (2.61-5.2)  | 100 %   | 99.97 % | 87.74 % |
| LK Herford                    | 100 | 0.93 (0.62-1.35) | 32.57 % | 0 %     | 0 %     |
| LK Höxter                     | 101 | 0.82 (0.55-1.16) | 12.26 % | 0 %     | 0 %     |
| LK Lippe                      | 102 | 0.62 (0.43-0.85) | 0.19 %  | 0 %     | 0 %     |
| LK Minden-Lübbecke            | 103 | 0.84 (0.57-1.19) | 15.26 % | 0 %     | 0 %     |
| LK Paderborn                  | 104 | 0.85 (0.57-1.22) | 17.45 % | 0 %     | 0 %     |
| SK Bochum                     | 105 | 2.26 (1.55-3.18) | 100 %   | 71.46 % | 5.02 %  |
| SK Dortmund                   | 106 | 1.1 (0.75-1.58)  | 66.25 % | 0.07 %  | 0 %     |
| SK Hagen                      | 107 | 2.68 (1.77-3.9)  | 100 %   | 91.08 % | 25.59 % |
| SK Hamm                       | 108 | 2.07 (1.36-3.01) | 99.97 % | 52.08 % | 2.63 %  |
| SK Herne                      | 109 | 4.1 (2.66-6.06)  | 100 %   | 99.95 % | 91.53 % |
| LK Ennepe-Ruhr-Kreis          | 110 | 0.95 (0.66-1.32) | 34.2 %  | 0 %     | 0 %     |
| LK Hochsauerlandkreis         | 111 | 0.82 (0.56-1.16) | 12.51 % | 0 %     | 0 %     |
| LK Märkischer Kreis           | 112 | 1.1 (0.76-1.53)  | 66.84 % | 0.03 %  | 0 %     |
| LK Olpe                       | 113 | 1.63 (1.08-2.35) | 99.04 % | 12.71 % | 0.07 %  |
| LK Siegen-Wittgenstein        | 114 | 0.97 (0.67-1.36) | 39.13 % | 0 %     | 0 %     |
| LK Soest                      | 115 | 0.51 (0.35-0.72) | 0.01 %  | 0 %     | 0 %     |
| LK Unna                       | 116 | 1.21 (0.84-1.7)  | 83.65 % | 0.2 %   | 0 %     |
| SK Darmstadt                  | 117 | 1.21 (0.75-1.84) | 75.86 % | 1.06 %  | 0 %     |
| SK Frankfurt am Main          | 118 | 1.03 (0.72-1.43) | 52.96 % | 0.01 %  | 0 %     |
| SK Offenbach                  | 119 | 2.63 (1.68-3.92) | 100 %   | 87.41 % | 23.43 % |
| SK Wiesbaden                  | 120 | 2.01 (1.35-2.87) | 99.98 % | 46.67 % | 1.44 %  |
| LK Bergstraße                 | 121 | 0.9 (0.63-1.25)  | 24.74 % | 0 %     | 0 %     |
| LK Darmstadt-Dieburg          | 122 | 0.8 (0.55-1.13)  | 9.92 %  | 0 %     | 0 %     |
| LK Groß-Gerau                 | 123 | 2.33 (1.66-3.19) | 100 %   | 79.88 % | 5.61 %  |
| LK Hochtaunuskreis            | 124 | 0.76 (0.52-1.08) | 6.3 %   | 0 %     | 0 %     |
| LK Main-Kinzig-Kreis          | 125 | 0.93 (0.65-1.27) | 29.54 % | 0 %     | 0 %     |
| LK Main-Taunus-Kreis          | 126 | 1.57 (1.06-2.25) | 98.72 % | 8.98 %  | 0.03 %  |
| LK Odenwaldkreis              | 127 | 1.64 (1.08-2.38) | 99 %    | 13.54 % | 0.09 %  |
| LK Offenbach                  | 128 | 1.76 (1.22-2.45) | 99.9 %  | 20.85 % | 0.1 %   |
| LK Rheingau-Taunus-Kreis      | 129 | 1.18 (0.8-1.69)  | 77.93 % | 0.22 %  | 0 %     |
| LK Wetteraukreis              | 130 | 0.61 (0.41-0.87) | 0.36 %  | 0 %     | 0 %     |

|                               |     |                  |         |         |         |
|-------------------------------|-----|------------------|---------|---------|---------|
| LK Gießen                     | 131 | 0.61 (0.4-0.9)   | 0.68 %  | 0 %     | 0 %     |
| LK Lahn-Dill-Kreis            | 132 | 0.59 (0.4-0.83)  | 0.14 %  | 0 %     | 0 %     |
| LK Limburg-Weilburg           | 133 | 0.86 (0.57-1.25) | 20.18 % | 0 %     | 0 %     |
| LK Marburg-Biedenkopf         | 134 | 0.64 (0.43-0.9)  | 0.67 %  | 0 %     | 0 %     |
| LK Vogelsbergkreis            | 135 | 0.58 (0.39-0.83) | 0.19 %  | 0 %     | 0 %     |
| SK Kassel                     | 136 | 1.59 (1-2.41)    | 97.35 % | 12.91 % | 0.17 %  |
| LK Fulda                      | 137 | 0.82 (0.56-1.16) | 12.68 % | 0 %     | 0 %     |
| LK Hersfeld-Rotenburg         | 138 | 1.22 (0.8-1.78)  | 80.94 % | 0.57 %  | 0 %     |
| LK Kassel                     | 139 | 0.95 (0.65-1.34) | 35.65 % | 0 %     | 0 %     |
| LK Schwalm-Eder-Kreis         | 140 | 0.89 (0.6-1.27)  | 23.32 % | 0 %     | 0 %     |
| LK Waldeck-Frankenberg        | 141 | 0.91 (0.61-1.3)  | 27.78 % | 0 %     | 0 %     |
| LK Werra-Meißner-Kreis        | 142 | 0.82 (0.55-1.16) | 12.15 % | 0 %     | 0 %     |
| SK Koblenz                    | 143 | 1.72 (1.1-2.56)  | 99.13 % | 20.89 % | 0.37 %  |
| LK Ahrweiler                  | 144 | 1.48 (0.99-2.12) | 97.02 % | 4.93 %  | 0.01 %  |
| LK Altenkirchen               | 145 | 0.88 (0.59-1.27) | 22.76 % | 0 %     | 0 %     |
| LK Bad Kreuznach              | 146 | 1 (0.67-1.42)    | 45.21 % | 0.01 %  | 0 %     |
| LK Birkenfeld                 | 147 | 1.01 (0.67-1.46) | 48.04 % | 0.02 %  | 0 %     |
| LK Cochem-Zell                | 148 | 1.32 (0.84-1.97) | 87.88 % | 2.22 %  | 0.01 %  |
| LK Mayen-Koblenz              | 149 | 1.04 (0.72-1.44) | 54.54 % | 0.01 %  | 0 %     |
| LK Neuwied                    | 150 | 1.6 (1.07-2.3)   | 98.96 % | 10.69 % | 0.04 %  |
| LK Rhein-Hunsrück-Kreis       | 151 | 0.89 (0.6-1.27)  | 23.55 % | 0 %     | 0 %     |
| LK Rhein-Lahn-Kreis           | 152 | 0.63 (0.42-0.91) | 0.69 %  | 0 %     | 0 %     |
| LK Westerwaldkreis            | 153 | 0.88 (0.61-1.23) | 20.92 % | 0 %     | 0 %     |
| SK Trier                      | 154 | 0.89 (0.52-1.41) | 27.26 % | 0.04 %  | 0 %     |
| LK Bernkastel-Wittlich        | 155 | 1.11 (0.74-1.61) | 67.1 %  | 0.12 %  | 0 %     |
| LK Bitburg-Prüm               | 156 | 2.39 (1.55-3.51) | 100 %   | 77.02 % | 11.44 % |
| LK Vulkaneifel                | 157 | 1.33 (0.88-1.94) | 90.41 % | 1.81 %  | 0 %     |
| LK Trier-Saarburg             | 158 | 1.22 (0.82-1.76) | 82.46 % | 0.44 %  | 0 %     |
| SK Frankenthal                | 159 | 2.07 (1.29-3.16) | 99.89 % | 51.66 % | 4.21 %  |
| SK Kaiserslautern             | 160 | 1.57 (0.96-2.41) | 96.28 % | 12.41 % | 0.2 %   |
| SK Landau i.d.Pfalz           | 161 | 0.84 (0.51-1.3)  | 19.56 % | 0.01 %  | 0 %     |
| SK Ludwigshafen               | 162 | 3.11 (2.01-4.59) | 100 %   | 97.55 % | 52.21 % |
| SK Mainz                      | 163 | 2.52 (1.63-3.72) | 100 %   | 83.69 % | 17.45 % |
| SK Neustadt<br>a.d.Weinstraße | 164 | 1.3 (0.8-1.99)   | 84.46 % | 2.42 %  | 0.01 %  |
| SK Pirmasens                  | 165 | 0.62 (0.35-1.04) | 3.42 %  | 0 %     | 0 %     |
| SK Speyer                     | 166 | 3.46 (2.19-5.2)  | 100 %   | 99.09 % | 70.29 % |
| SK Worms                      | 167 | 1.65 (1.06-2.44) | 98.75 % | 15.53 % | 0.17 %  |
| SK Zweibrücken                | 168 | 0.93 (0.54-1.49) | 33.44 % | 0.11 %  | 0 %     |
| LK Alzey-Worms                | 169 | 1.21 (0.83-1.72) | 82.34 % | 0.28 %  | 0 %     |
| LK Bad Dürkheim               | 170 | 0.95 (0.66-1.31) | 34.32 % | 0 %     | 0 %     |
| LK Donnersbergkreis           | 171 | 1.13 (0.74-1.66) | 68.35 % | 0.22 %  | 0 %     |
| LK Germersheim                | 172 | 1.62 (1.07-2.33) | 98.94 % | 11.96 % | 0.06 %  |
| LK Kaiserslautern             | 173 | 1.22 (0.82-1.75) | 81.88 % | 0.43 %  | 0 %     |
| LK Kusel                      | 174 | 1.09 (0.73-1.57) | 63.67 % | 0.07 %  | 0 %     |
| LK Südliche Weinstraße        | 175 | 0.68 (0.45-0.99) | 2.25 %  | 0 %     | 0 %     |
| LK Rhein-Pfalz-Kreis          | 176 | 1.61 (1.15-2.18) | 99.77 % | 7.78 %  | 0 %     |

|                             |     |                  |         |         |         |
|-----------------------------|-----|------------------|---------|---------|---------|
| LK Mainz-Bingen             | 177 | 1.26 (0.88-1.75) | 88.86 % | 0.36 %  | 0 %     |
| LK Südwestpfalz             | 178 | 0.63 (0.42-0.91) | 0.82 %  | 0 %     | 0 %     |
| SK Stuttgart                | 179 | 1.08 (0.72-1.56) | 61.74 % | 0.07 %  | 0 %     |
| LK Böblingen                | 180 | 1.49 (1.03-2.07) | 98.34 % | 3.95 %  | 0 %     |
| LK Esslingen                | 181 | 0.96 (0.65-1.38) | 38.61 % | 0 %     | 0 %     |
| LK Göppingen                | 182 | 1.94 (1.33-2.74) | 99.98 % | 40.11 % | 0.74 %  |
| LK Ludwigsburg              | 183 | 0.9 (0.6-1.28)   | 25.04 % | 0 %     | 0 %     |
| LK Rems-Murr-Kreis          | 184 | 2.05 (1.43-2.85) | 100 %   | 51.65 % | 1.22 %  |
| SK Heilbronn                | 185 | 4.86 (2.95-7.55) | 100 %   | 99.98 % | 97.06 % |
| LK Heilbronn                | 186 | 1.55 (1.1-2.12)  | 99.39 % | 5.42 %  | 0 %     |
| LK Hohenlohekreis           | 187 | 1.82 (1.19-2.67) | 99.72 % | 28.7 %  | 0.61 %  |
| LK Schwäbisch Hall          | 188 | 1.41 (0.96-2.01) | 95.81 % | 2.65 %  | 0 %     |
| LK Main-Tauber-Kreis        | 189 | 1.74 (1.2-2.44)  | 99.85 % | 19.62 % | 0.1 %   |
| LK Heidenheim               | 190 | 2.11 (1.43-3.01) | 99.99 % | 57.59 % | 2.59 %  |
| LK Ostalbkreis              | 191 | 2.24 (1.54-3.15) | 100 %   | 69.66 % | 4.5 %   |
| SK Baden-Baden              | 192 | 1.97 (1.15-3.15) | 99.36 % | 42.4 %  | 3.88 %  |
| SK Karlsruhe                | 193 | 0.6 (0.38-0.89)  | 0.67 %  | 0 %     | 0 %     |
| LK Karlsruhe                | 194 | 0.78 (0.55-1.07) | 6.02 %  | 0 %     | 0 %     |
| LK Rastatt                  | 195 | 0.82 (0.55-1.17) | 12.97 % | 0 %     | 0 %     |
| SK Heidelberg               | 196 | 1.07 (0.66-1.64) | 56.77 % | 0.24 %  | 0 %     |
| SK Mannheim                 | 197 | 1.73 (1.19-2.44) | 99.8 %  | 19.21 % | 0.11 %  |
| LK Neckar-Odenwald-Kreis    | 198 | 1.24 (0.83-1.77) | 84.29 % | 0.51 %  | 0 %     |
| LK Rhein-Neckar-Kreis       | 199 | 0.69 (0.49-0.95) | 1.29 %  | 0 %     | 0 %     |
| SK Pforzheim                | 200 | 4.59 (2.88-6.94) | 100 %   | 99.98 % | 96.17 % |
| LK Calw                     | 201 | 1.59 (1.09-2.24) | 99.22 % | 9.12 %  | 0.02 %  |
| LK Enzkreis                 | 202 | 2.18 (1.51-3.05) | 100 %   | 64.85 % | 3.09 %  |
| LK Freudenstadt             | 203 | 1.26 (0.84-1.81) | 86.09 % | 0.67 %  | 0 %     |
| SK Freiburg i. Breisgau     | 204 | 0.97 (0.61-1.48) | 40.46 % | 0.05 %  | 0 %     |
| LK Breisgau-Hochschwarzwald | 205 | 0.99 (0.66-1.42) | 43.24 % | 0.01 %  | 0 %     |
| LK Emmendingen              | 206 | 1.12 (0.73-1.65) | 66.73 % | 0.19 %  | 0 %     |
| LK Ortenaukreis             | 207 | 0.73 (0.49-1.05) | 4.25 %  | 0 %     | 0 %     |
| LK Rottweil                 | 208 | 1.22 (0.81-1.77) | 81.23 % | 0.5 %   | 0 %     |
| LK Schwarzwald-Baar-Kreis   | 209 | 0.84 (0.58-1.2)  | 15.92 % | 0 %     | 0 %     |
| LK Tuttlingen               | 210 | 1.08 (0.72-1.57) | 61.42 % | 0.08 %  | 0 %     |
| LK Konstanz                 | 211 | 0.64 (0.42-0.94) | 1.26 %  | 0 %     | 0 %     |
| LK Lörrach                  | 212 | 0.89 (0.56-1.36) | 26.98 % | 0.01 %  | 0 %     |
| LK Waldshut                 | 213 | 0.78 (0.49-1.17) | 10.51 % | 0 %     | 0 %     |
| LK Reutlingen               | 214 | 1.72 (1.21-2.38) | 99.89 % | 17.1 %  | 0.05 %  |
| LK Tübingen                 | 215 | 1.23 (0.82-1.76) | 82.78 % | 0.48 %  | 0 %     |
| LK Zollernalbkreis          | 216 | 1.7 (1.15-2.42)  | 99.64 % | 16.95 % | 0.1 %   |
| SK Ulm                      | 217 | 2.77 (1.73-4.21) | 100 %   | 90.42 % | 31.99 % |
| LK Alb-Donau-Kreis          | 218 | 1.78 (1.23-2.51) | 99.89 % | 23.55 % | 0.16 %  |
| LK Biberach                 | 219 | 1.15 (0.78-1.62) | 73.68 % | 0.1 %   | 0 %     |
| LK Bodenseekreis            | 220 | 0.64 (0.41-0.94) | 1.24 %  | 0 %     | 0 %     |
| LK Ravensburg               | 221 | 0.78 (0.53-1.1)  | 7.4 %   | 0 %     | 0 %     |

|                                |     |                   |         |         |         |
|--------------------------------|-----|-------------------|---------|---------|---------|
| LK Sigmaringen                 | 222 | 1.11 (0.76-1.57)  | 67.67 % | 0.06 %  | 0 %     |
| SK Ingolstadt                  | 223 | 2.58 (1.65-3.85)  | 100 %   | 85.75 % | 21.14 % |
| SK München                     | 224 | 1.29 (0.85-1.89)  | 87.48 % | 1.3 %   | 0 %     |
| SK Rosenheim                   | 225 | 8.2 (4.91-12.87)  | 100 %   | 100 %   | 100 %   |
| LK Altötting                   | 226 | 2.19 (1.39-3.27)  | 99.97 % | 61.64 % | 5.94 %  |
| LK Berchtesgadener Land        | 227 | 2.71 (1.62-4.25)  | 100 %   | 86.41 % | 29.44 % |
| LK Bad Tölz-<br>Wolfratshausen | 228 | 2.36 (1.56-3.42)  | 100 %   | 76.22 % | 9.57 %  |
| LK Dachau                      | 229 | 2.44 (1.66-3.47)  | 100 %   | 83.02 % | 11.79 % |
| LK Ebersberg                   | 230 | 2.4 (1.57-3.52)   | 100 %   | 78.28 % | 11.97 % |
| LK Eichstätt                   | 231 | 1.32 (0.91-1.86)  | 92.08 % | 0.92 %  | 0 %     |
| LK Erding                      | 232 | 3.63 (2.44-5.2)   | 100 %   | 99.85 % | 81.07 % |
| LK Freising                    | 233 | 3.22 (2.2-4.55)   | 100 %   | 99.31 % | 61.38 % |
| LK Fürstenfeldbruck            | 234 | 2.28 (1.56-3.23)  | 100 %   | 73.04 % | 5.99 %  |
| LK Garmisch-<br>Partenkirchen  | 235 | 2.29 (1.45-3.44)  | 99.99 % | 69 %    | 9.05 %  |
| LK Landsberg a.Lech            | 236 | 1.98 (1.34-2.82)  | 99.97 % | 43.82 % | 1.17 %  |
| LK Miesbach                    | 237 | 2.95 (1.88-4.42)  | 100 %   | 95.32 % | 42.75 % |
| LK Mühldorf a.Inn              | 238 | 2.22 (1.51-3.14)  | 100 %   | 67.79 % | 4.34 %  |
| LK München                     | 239 | 2.97 (2.13-4.04)  | 100 %   | 99.02 % | 44.41 % |
| LK Neuburg-<br>Schrobenhausen  | 240 | 2.36 (1.56-3.42)  | 100 %   | 76.24 % | 9.59 %  |
| LK Pfaffenhofen a.d.Ilm        | 241 | 1.62 (1.1-2.3)    | 99.31 % | 11.19 % | 0.04 %  |
| LK Rosenheim                   | 242 | 2.37 (1.61-3.35)  | 100 %   | 78.73 % | 8.62 %  |
| LK Starnberg                   | 243 | 3.22 (2.15-4.64)  | 100 %   | 98.97 % | 60.25 % |
| LK Traunstein                  | 244 | 2.48 (1.63-3.62)  | 100 %   | 82.82 % | 15.11 % |
| LK Weilheim-Schongau           | 245 | 1.44 (0.95-2.09)  | 95.59 % | 4.04 %  | 0.01 %  |
| SK Landshut                    | 246 | 3.1 (1.84-4.9)    | 100 %   | 94.78 % | 50.24 % |
| SK Passau                      | 247 | 3.82 (2.26-6.05)  | 100 %   | 99.25 % | 79.63 % |
| SK Straubing                   | 248 | 5.66 (3.34-8.99)  | 100 %   | 100 %   | 99.12 % |
| LK Deggendorf                  | 249 | 1.9 (1.27-2.73)   | 99.92 % | 35.75 % | 0.76 %  |
| LK Freyung-Grafenau            | 250 | 1.78 (1.12-2.69)  | 99.33 % | 26.49 % | 0.73 %  |
| LK Kelheim                     | 251 | 2.19 (1.48-3.13)  | 100 %   | 64.79 % | 4.13 %  |
| LK Landshut                    | 252 | 1.82 (1.27-2.52)  | 99.95 % | 26.07 % | 0.16 %  |
| LK Passau                      | 253 | 1.86 (1.22-2.72)  | 99.82 % | 32.47 % | 0.77 %  |
| LK Regen                       | 254 | 2.76 (1.79-4.06)  | 100 %   | 92.23 % | 30.36 % |
| LK Rottal-Inn                  | 255 | 2.38 (1.61-3.39)  | 100 %   | 79 %    | 9.37 %  |
| LK Straubing-Bogen             | 256 | 2.36 (1.6-3.35)   | 100 %   | 78.07 % | 8.52 %  |
| LK Dingolfing-Landau           | 257 | 9.49 (6.21-13.89) | 100 %   | 100 %   | 100 %   |
| SK Amberg                      | 258 | 1.88 (1.08-3.04)  | 98.7 %  | 35.38 % | 2.88 %  |
| SK Regensburg                  | 259 | 2.82 (1.7-4.4)    | 100 %   | 89.89 % | 35.07 % |
| SK Weiden i.d.OPf.             | 260 | 8.85 (5.24-14.01) | 100 %   | 100 %   | 100 %   |
| LK Amberg-Sulzbach             | 261 | 1.63 (1.09-2.34)  | 99.14 % | 12.47 % | 0.06 %  |
| LK Cham                        | 262 | 1.53 (1-2.25)     | 97.34 % | 8.33 %  | 0.04 %  |
| LK Neumarkt i.d.OPf.           | 263 | 2.16 (1.48-3.03)  | 100 %   | 62.56 % | 2.91 %  |
| LK Neustadt<br>a.d.Waldnaab    | 264 | 4.92 (3.29-7.09)  | 100 %   | 100 %   | 99.2 %  |
| LK Regensburg                  | 265 | 1.41 (0.96-1.99)  | 95.93 % | 2.31 %  | 0 %     |
| LK Schwandorf                  | 266 | 1.35 (0.89-1.96)  | 91.82 % | 1.97 %  | 0 %     |

|                                         |     |                  |         |         |         |
|-----------------------------------------|-----|------------------|---------|---------|---------|
| LK Tirschenreuth                        | 267 | 4.2 (2.68-6.27)  | 100 %   | 99.95 % | 92.52 % |
| SK Bamberg                              | 268 | 1.6 (0.94-2.54)  | 95.71 % | 15.5 %  | 0.45 %  |
| SK Bayreuth                             | 269 | 1.57 (0.92-2.5)  | 94.9 %  | 13.91 % | 0.38 %  |
| SK Coburg                               | 270 | 2.66 (1.53-4.3)  | 99.98 % | 82.56 % | 27.7 %  |
| SK Hof                                  | 271 | 3.3 (1.94-5.26)  | 100 %   | 96.6 %  | 59.52 % |
| LK Bamberg                              | 272 | 1.23 (0.86-1.7)  | 86.54 % | 0.19 %  | 0 %     |
| LK Bayreuth                             | 273 | 1.49 (1.05-2.05) | 98.68 % | 3.56 %  | 0 %     |
| LK Coburg                               | 274 | 3.28 (2.23-4.66) | 100 %   | 99.41 % | 64.66 % |
| LK Forchheim                            | 275 | 0.91 (0.59-1.35) | 29.23 % | 0.01 %  | 0 %     |
| LK Hof                                  | 276 | 2.32 (1.58-3.29) | 100 %   | 75.47 % | 7.09 %  |
| LK Kronach                              | 277 | 1.54 (1.03-2.22) | 98.32 % | 7.65 %  | 0.02 %  |
| LK Kulmbach                             | 278 | 1.81 (1.16-2.69) | 99.59 % | 28.1 %  | 0.69 %  |
| LK Lichtenfels                          | 279 | 3.03 (1.99-4.42) | 100 %   | 97.28 % | 47.65 % |
| LK Wunsiedel<br>i.Fichtelgebirge        | 280 | 3.24 (2.06-4.86) | 100 %   | 98.13 % | 59.51 % |
| SK Ansbach                              | 281 | 3.03 (1.76-4.86) | 100 %   | 92.81 % | 46.14 % |
| SK Erlangen                             | 282 | 1.71 (1.11-2.52) | 99.24 % | 19.69 % | 0.28 %  |
| SK Fürth                                | 283 | 2.75 (1.76-4.1)  | 100 %   | 91.39 % | 30.52 % |
| SK Nürnberg                             | 284 | 1.83 (1.27-2.54) | 99.96 % | 27.49 % | 0.19 %  |
| SK Schwabach                            | 285 | 2.53 (1.53-3.94) | 99.99 % | 79.88 % | 20.25 % |
| LK Ansbach                              | 286 | 1.53 (1.08-2.11) | 99.14 % | 5.04 %  | 0 %     |
| LK Erlangen-Höchstadt                   | 287 | 1.34 (0.91-1.9)  | 92.97 % | 1.34 %  | 0 %     |
| LK Fürth                                | 288 | 2.25 (1.54-3.18) | 100 %   | 70.88 % | 4.99 %  |
| LK Nürnberger Land                      | 289 | 1.24 (0.85-1.74) | 85.3 %  | 0.35 %  | 0 %     |
| LK Neustadt a.d.Aisch-<br>Bad Windsheim | 290 | 1.43 (0.97-2.03) | 96.44 % | 3.08 %  | 0 %     |
| LK Roth                                 | 291 | 1.18 (0.81-1.66) | 79.35 % | 0.15 %  | 0 %     |
| LK Weißenburg-<br>Gunzenhausen          | 292 | 2.06 (1.34-3.04) | 99.96 % | 51.64 % | 2.88 %  |
| SK Aschaffenburg                        | 293 | 1.32 (0.8-2.05)  | 84.51 % | 3.13 %  | 0.02 %  |
| SK Schweinfurt                          | 294 | 4.13 (2.45-6.53) | 100 %   | 99.71 % | 87.42 % |
| SK Würzburg                             | 295 | 3.34 (2.02-5.22) | 100 %   | 97.67 % | 62.62 % |
| LK Aschaffenburg                        | 296 | 1.09 (0.74-1.56) | 64.32 % | 0.06 %  | 0 %     |
| LK Bad Kissingen                        | 297 | 1.14 (0.75-1.66) | 70.05 % | 0.2 %   | 0 %     |
| LK Rhön-Grabfeld                        | 298 | 1.71 (1.14-2.45) | 99.56 % | 18.16 % | 0.15 %  |
| LK Haßberge                             | 299 | 1.37 (0.89-2)    | 92.03 % | 2.49 %  | 0 %     |
| LK Kitzingen                            | 300 | 1.65 (1.06-2.45) | 98.75 % | 15.64 % | 0.18 %  |
| LK Miltenberg                           | 301 | 1.26 (0.86-1.79) | 87.51 % | 0.58 %  | 0 %     |
| LK Main-Spessart                        | 302 | 0.96 (0.65-1.36) | 37.5 %  | 0 %     | 0 %     |
| LK Schweinfurt                          | 303 | 2.81 (1.95-3.92) | 100 %   | 96.6 %  | 32.44 % |
| LK Würzburg                             | 304 | 1.81 (1.23-2.57) | 99.87 % | 26.6 %  | 0.29 %  |
| SK Augsburg                             | 305 | 1.66 (1.05-2.5)  | 98.44 % | 17.16 % | 0.29 %  |
| SK Kaufbeuren                           | 306 | 3.38 (1.98-5.39) | 100 %   | 97.19 % | 62.85 % |
| SK Kempten                              | 307 | 2.07 (1.22-3.29) | 99.69 % | 50.4 %  | 5.62 %  |
| SK Memmingen                            | 308 | 2.25 (1.4-3.44)  | 99.97 % | 65.26 % | 8.63 %  |
| LK Aichach-Friedberg                    | 309 | 2.05 (1.42-2.87) | 99.99 % | 51.73 % | 1.38 %  |
| LK Augsburg                             | 310 | 1.12 (0.78-1.55) | 70.22 % | 0.04 %  | 0 %     |
| LK Dillingen a.d.Donau                  | 311 | 1.59 (1.03-2.36) | 98.17 % | 11.93 % | 0.1 %   |

|                                |     |                  |         |         |        |
|--------------------------------|-----|------------------|---------|---------|--------|
| LK Günzburg                    | 312 | 1.48 (1-2.12)    | 97.42 % | 4.91 %  | 0.01 % |
| LK Neu-Ulm                     | 313 | 1.73 (1.15-2.49) | 99.61 % | 20.02 % | 0.19 % |
| LK Lindau                      | 314 | 1.56 (0.98-2.35) | 96.94 % | 10.82 % | 0.11 % |
| LK Ostallgäu                   | 315 | 1.59 (1.08-2.25) | 99.13 % | 9.17 %  | 0.02 % |
| LK Unterallgäu                 | 316 | 1.92 (1.33-2.67) | 99.98 % | 36.86 % | 0.45 % |
| LK Donau-Ries                  | 317 | 1.47 (1.02-2.03) | 98.11 % | 3.15 %  | 0 %    |
| LK Oberallgäu                  | 318 | 1.28 (0.85-1.85) | 87.12 % | 0.93 %  | 0 %    |
| LK Stadtverband Saarbrücken    | 319 | 1.38 (0.89-2.03) | 92.26 % | 3.04 %  | 0.01 % |
| LK Merzig-Wadern               | 320 | 1.47 (0.93-2.22) | 94.97 % | 6.8 %   | 0.04 % |
| LK Neunkirchen                 | 321 | 1.63 (1.09-2.36) | 99.09 % | 13.18 % | 0.08 % |
| LK Saarlouis                   | 322 | 1.06 (0.69-1.56) | 56.91 % | 0.08 %  | 0 %    |
| LK Saar-Pfalz-Kreis            | 323 | 1.14 (0.76-1.63) | 71.46 % | 0.13 %  | 0 %    |
| LK Sankt Wendel                | 324 | 1.27 (0.85-1.84) | 86.92 % | 0.88 %  | 0 %    |
| SK Berlin                      | 325 | 2.16 (1.55-2.92) | 100 %   | 64.98 % | 1.7 %  |
| SK Brandenburg a.d.Havel       | 326 | 0.38 (0.23-0.6)  | 0 %     | 0 %     | 0 %    |
| SK Cottbus                     | 327 | 0.37 (0.22-0.6)  | 0 %     | 0 %     | 0 %    |
| SK Frankfurt (Oder)            | 328 | 0.62 (0.37-0.99) | 2.21 %  | 0 %     | 0 %    |
| SK Potsdam                     | 329 | 0.57 (0.36-0.86) | 0.42 %  | 0 %     | 0 %    |
| LK Barnim                      | 330 | 0.55 (0.36-0.81) | 0.16 %  | 0 %     | 0 %    |
| LK Dahme-Spreewald             | 331 | 0.49 (0.33-0.71) | 0.01 %  | 0 %     | 0 %    |
| LK Elbe-Elster                 | 332 | 0.46 (0.31-0.67) | 0 %     | 0 %     | 0 %    |
| LK Havelland                   | 333 | 0.41 (0.28-0.58) | 0 %     | 0 %     | 0 %    |
| LK Märkisch-Oderland           | 334 | 0.39 (0.25-0.59) | 0 %     | 0 %     | 0 %    |
| LK Oberhavel                   | 335 | 0.35 (0.23-0.5)  | 0 %     | 0 %     | 0 %    |
| LK Oberspreewald-Lausitz       | 336 | 0.53 (0.34-0.77) | 0.06 %  | 0 %     | 0 %    |
| LK Oder-Spree                  | 337 | 0.41 (0.27-0.59) | 0 %     | 0 %     | 0 %    |
| LK Ostprignitz-Ruppin          | 338 | 0.3 (0.2-0.44)   | 0 %     | 0 %     | 0 %    |
| LK Potsdam-Mittelmark          | 339 | 0.61 (0.42-0.85) | 0.22 %  | 0 %     | 0 %    |
| LK Prignitz                    | 340 | 0.26 (0.16-0.4)  | 0 %     | 0 %     | 0 %    |
| LK Spree-Neiße                 | 341 | 0.53 (0.35-0.77) | 0.05 %  | 0 %     | 0 %    |
| LK Teltow-Fläming              | 342 | 0.52 (0.34-0.76) | 0.04 %  | 0 %     | 0 %    |
| LK Uckermark                   | 343 | 0.17 (0.11-0.26) | 0 %     | 0 %     | 0 %    |
| SK Rostock                     | 344 | 0.14 (0.08-0.23) | 0 %     | 0 %     | 0 %    |
| SK Schwerin                    | 345 | 0.26 (0.16-0.42) | 0 %     | 0 %     | 0 %    |
| LK Mecklenburgische Seenplatte | 346 | 0.15 (0.1-0.21)  | 0 %     | 0 %     | 0 %    |
| LK Rostock                     | 347 | 0.1 (0.06-0.14)  | 0 %     | 0 %     | 0 %    |
| LK Vorpommern-Rügen            | 348 | 0.09 (0.06-0.14) | 0 %     | 0 %     | 0 %    |
| LK Nordwestmecklenburg         | 349 | 0.18 (0.11-0.26) | 0 %     | 0 %     | 0 %    |
| LK Vorpommern-Greifswald       | 350 | 0.19 (0.12-0.29) | 0 %     | 0 %     | 0 %    |
| LK Ludwigslust-Parchim         | 351 | 0.18 (0.13-0.26) | 0 %     | 0 %     | 0 %    |
| SK Chemnitz                    | 352 | 0.62 (0.39-0.92) | 0.91 %  | 0 %     | 0 %    |
| LK Erzgebirgskreis             | 353 | 0.73 (0.48-1.06) | 4.73 %  | 0 %     | 0 %    |
| LK Mittelsachsen               | 354 | 0.73 (0.51-1.02) | 3.11 %  | 0 %     | 0 %    |
| LK Vogtlandkreis               | 355 | 0.94 (0.63-1.36) | 34.08 % | 0 %     | 0 %    |
| LK Zwickau                     | 356 | 1.1 (0.75-1.55)  | 66.54 % | 0.05 %  | 0 %    |

|                                     |     |                  |         |         |         |
|-------------------------------------|-----|------------------|---------|---------|---------|
| SK Dresden                          | 357 | 0.31 (0.2-0.46)  | 0 %     | 0 %     | 0 %     |
| LK Bautzen                          | 358 | 0.67 (0.45-0.95) | 1.23 %  | 0 %     | 0 %     |
| LK Görlitz                          | 359 | 1.11 (0.7-1.66)  | 63.19 % | 0.27 %  | 0 %     |
| LK Meißen                           | 360 | 0.34 (0.23-0.48) | 0 %     | 0 %     | 0 %     |
| LK Sächsische Schweiz-Osterzgebirge | 361 | 0.56 (0.37-0.82) | 0.17 %  | 0 %     | 0 %     |
| SK Leipzig                          | 362 | 0.19 (0.12-0.29) | 0 %     | 0 %     | 0 %     |
| LK Leipzig                          | 363 | 0.29 (0.19-0.41) | 0 %     | 0 %     | 0 %     |
| LK Nordsachsen                      | 364 | 0.58 (0.4-0.81)  | 0.08 %  | 0 %     | 0 %     |
| SK Dessau-Roßlau                    | 365 | 0.38 (0.22-0.6)  | 0 %     | 0 %     | 0 %     |
| SK Halle                            | 366 | 0.41 (0.24-0.64) | 0.01 %  | 0 %     | 0 %     |
| SK Magdeburg                        | 367 | 0.52 (0.33-0.77) | 0.09 %  | 0 %     | 0 %     |
| LK Altmarkkreis Salzwedel           | 368 | 0.24 (0.15-0.36) | 0 %     | 0 %     | 0 %     |
| LK Anhalt-Bitterfeld                | 369 | 0.21 (0.14-0.31) | 0 %     | 0 %     | 0 %     |
| LK Börde                            | 370 | 0.26 (0.18-0.37) | 0 %     | 0 %     | 0 %     |
| LK Burgenlandkreis                  | 371 | 0.66 (0.46-0.92) | 0.72 %  | 0 %     | 0 %     |
| LK Harz                             | 372 | 0.32 (0.21-0.45) | 0 %     | 0 %     | 0 %     |
| LK Jerichower Land                  | 373 | 0.39 (0.26-0.56) | 0 %     | 0 %     | 0 %     |
| LK Mansfeld-Südharz                 | 374 | 0.24 (0.15-0.35) | 0 %     | 0 %     | 0 %     |
| LK Saalekreis                       | 375 | 0.31 (0.21-0.43) | 0 %     | 0 %     | 0 %     |
| LK Salzlandkreis                    | 376 | 0.23 (0.15-0.32) | 0 %     | 0 %     | 0 %     |
| LK Stendal                          | 377 | 0.25 (0.17-0.36) | 0 %     | 0 %     | 0 %     |
| LK Wittenberg                       | 378 | 0.4 (0.27-0.58)  | 0 %     | 0 %     | 0 %     |
| SK Erfurt                           | 379 | 0.3 (0.2-0.45)   | 0 %     | 0 %     | 0 %     |
| SK Gera                             | 380 | 1.34 (0.84-2.03) | 88.49 % | 2.98 %  | 0.01 %  |
| SK Jena                             | 381 | 0.53 (0.33-0.83) | 0.32 %  | 0 %     | 0 %     |
| SK Suhl                             | 382 | 0.65 (0.39-1.03) | 3.4 %   | 0 %     | 0 %     |
| SK Weimar                           | 383 | 0.7 (0.4-1.14)   | 7.24 %  | 0 %     | 0 %     |
| SK Eisenach                         | 384 | 0.34 (0.19-0.56) | 0 %     | 0 %     | 0 %     |
| LK Eichsfeld                        | 385 | 0.71 (0.46-1.04) | 3.69 %  | 0 %     | 0 %     |
| LK Nordhausen                       | 386 | 0.34 (0.22-0.5)  | 0 %     | 0 %     | 0 %     |
| LK Wartburgkreis                    | 387 | 0.4 (0.26-0.58)  | 0 %     | 0 %     | 0 %     |
| LK Unstrut-Hainich-Kreis            | 388 | 0.55 (0.36-0.8)  | 0.1 %   | 0 %     | 0 %     |
| LK Kyffhäuserkreis                  | 389 | 0.44 (0.29-0.64) | 0 %     | 0 %     | 0 %     |
| LK Schmalkalden-Meiningen           | 390 | 0.69 (0.46-0.99) | 2.28 %  | 0 %     | 0 %     |
| LK Gotha                            | 391 | 0.66 (0.44-0.95) | 1.45 %  | 0 %     | 0 %     |
| LK Sömmerda                         | 392 | 0.55 (0.36-0.81) | 0.15 %  | 0 %     | 0 %     |
| LK Hildburghausen                   | 393 | 2.14 (1.47-3.02) | 100 %   | 61.09 % | 2.74 %  |
| LK Ilm-Kreis                        | 394 | 0.62 (0.42-0.9)  | 0.6 %   | 0 %     | 0 %     |
| LK Weimarer Land                    | 395 | 0.58 (0.39-0.83) | 0.17 %  | 0 %     | 0 %     |
| LK Sonneberg                        | 396 | 3.9 (2.51-5.78)  | 100 %   | 99.87 % | 86.66 % |
| LK Saalfeld-Rudolstadt              | 397 | 0.51 (0.34-0.74) | 0.02 %  | 0 %     | 0 %     |
| LK Saale-Holzland-Kreis             | 398 | 0.71 (0.47-1.03) | 3.4 %   | 0 %     | 0 %     |
| LK Saale-Orla-Kreis                 | 399 | 0.95 (0.63-1.38) | 36.06 % | 0.01 %  | 0 %     |
| LK Greiz                            | 400 | 2.13 (1.45-3.02) | 100 %   | 59.53 % | 2.79 %  |
| LK Altenburger Land                 | 401 | 0.98 (0.65-1.43) | 42.23 % | 0.02 %  | 0 %     |
